# Supplementary material for: Stereochemical investigations of the Tetrahymena cyclase, a model system for euphane/tirucallane biosynthesis
Source: Royal Society of Chemistry journal article supplement (doi:10.1039/c7ob00296c), 2017-01-01

**Stereochemical Investigations of the *Tetrahymena* Cyclase, a Model System for Euphane/Tirucallane Biosynthesis** José-Luis Giner\* and Ju Feng

**Supplementary information index**

**Substrates:**

|                                              |                                                                                                        |   |
|----------------------------------------------|--------------------------------------------------------------------------------------------------------|---|
| Tetranorsqualene ( <b>15</b> )               | <sup>1</sup> H-NMR spectrum (600 MHz, CDCl <sub>3</sub> )                                              | 2 |
| Pentanorsqualene (unlabeled <b>27</b> )      | <sup>1</sup> H-NMR spectrum (600 MHz, C <sub>6</sub> D <sub>6</sub> )                                  | 3 |
| Z- <i>d</i> 3-Pentanorsqualene ( <b>27</b> ) | <sup>1</sup> H-NMR spectrum (600 MHz, C <sub>6</sub> D <sub>6</sub> )                                  | 4 |
| Z- <i>d</i> 3-Pentanorsqualene ( <b>27</b> ) | <sup>2</sup> H-NMR spectrum (92 MHz, C <sub>6</sub> H <sub>6</sub> +1% C <sub>6</sub> D <sub>6</sub> ) | 5 |

**Products:**

|                                                              |                                                           |    |
|--------------------------------------------------------------|-----------------------------------------------------------|----|
| Product of <b>10</b> : 17 $\alpha$ -Pregnanone ( <b>10</b> ) | <sup>1</sup> H-NMR spectrum (600 MHz, CDCl <sub>3</sub> ) | 6  |
| Product of <b>15</b> : ( <b>16</b> + <b>17</b> )             | <sup>1</sup> H-NMR spectrum (800 MHz, CDCl <sub>3</sub> ) | 7  |
| Product of <b>15</b> : ( <b>16</b> + <b>17</b> )             | HSQC spectrum (800 MHz, CDCl <sub>3</sub> )               | 8  |
| Product of <b>27</b> : ( <b>28</b> )                         | <sup>1</sup> H-NMR spectrum (800 MHz, CDCl <sub>3</sub> ) | 9  |
| Product of <b>27</b> : ( <b>28</b> )                         | HSQC spectrum (800 MHz, CDCl <sub>3</sub> )               | 10 |

**Synthesis of potential products:**

|                                                      |                                                           |    |
|------------------------------------------------------|-----------------------------------------------------------|----|
| 17 $\beta$ -Pregnanone ( <b>11</b> )                 | <sup>1</sup> H-NMR spectrum (600 MHz, CDCl <sub>3</sub> ) | 11 |
| Diol from butyrospermol acetate                      | <sup>1</sup> H-NMR spectrum (600 MHz, CDCl <sub>3</sub> ) | 12 |
| Trisnoreuph-7-ene aldehyde ( <b>19</b> )             | <sup>1</sup> H-NMR spectrum (600 MHz, CDCl <sub>3</sub> ) | 13 |
| Tetranoreuph-7-enol ( <b>20</b> )                    | <sup>1</sup> H-NMR spectrum (600 MHz, CDCl <sub>3</sub> ) | 14 |
| Tetranoreuph-7-enone ( <b>21</b> )                   | <sup>1</sup> H-NMR spectrum (600 MHz, CDCl <sub>3</sub> ) | 15 |
| Tetranoreuph-7-ene ( <b>16</b> )                     | <sup>1</sup> H-NMR spectrum (800 MHz, CDCl <sub>3</sub> ) | 16 |
| Tetranoreuph-7-ene ( <b>16</b> )                     | HSQC spectrum (800 MHz, CDCl <sub>3</sub> )               | 17 |
| Trisnormastica-7-enoic acid ( <b>23</b> )            | <sup>1</sup> H-NMR spectrum (600 MHz, CDCl <sub>3</sub> ) | 18 |
| Trisnormastica-7-enal ( <b>24</b> )                  | <sup>1</sup> H-NMR spectrum (600 MHz, CDCl <sub>3</sub> ) | 19 |
| Tetranortirucall-7-ene ( <b>17</b> )                 | <sup>1</sup> H-NMR spectrum (800 MHz, CDCl <sub>3</sub> ) | 20 |
| Tetranortirucall-7-ene ( <b>17</b> )                 | HSQC spectrum (800 MHz, CDCl <sub>3</sub> )               | 21 |
| Tetranor-7,22-tirucalladien-3-one                    | <sup>1</sup> H-NMR spectrum (600 MHz, CDCl <sub>3</sub> ) | 22 |
| Tetranor-7,22-tirucalladiene ( <b>29</b> )           | <sup>1</sup> H-NMR spectrum (600 MHz, CDCl <sub>3</sub> ) | 23 |
| Tetranor-7,22-tirucalladien-23-ol ( <b>30</b> )      | <sup>1</sup> H-NMR spectrum (300 MHz, CDCl <sub>3</sub> ) | 24 |
| Tetranor-7,22-tirucalladien-23-al ( <b>31</b> )      | <sup>1</sup> H-NMR spectrum (300 MHz, CDCl <sub>3</sub> ) | 25 |
| Pentanortirucall-7-ene ( <b>33</b> )                 | <sup>1</sup> H-NMR spectrum (800 MHz, CDCl <sub>3</sub> ) | 26 |
| Pentanortirucall-7-ene ( <b>33</b> )                 | HSQC spectrum (800 MHz, CDCl <sub>3</sub> )               | 27 |
| 23-d-Tetranor-7,22-tirucalladien-23-ol               | <sup>1</sup> H-NMR spectrum (300 MHz, CDCl <sub>3</sub> ) | 28 |
| 23-d-Tetranor-7,22-tirucalladien-23-al ( <b>32</b> ) | <sup>1</sup> H-NMR spectrum (300 MHz, CDCl <sub>3</sub> ) | 29 |
| 22-d-Pentanortirucall-7-ene ( <b>34</b> )            | <sup>1</sup> H-NMR spectrum (600 MHz, CDCl <sub>3</sub> ) | 30 |

***Tetrahymena* triterpenes:**

|                                          |                                                           |    |
|------------------------------------------|-----------------------------------------------------------|----|
| Tetrahymanol ( <b>6</b> )                | <sup>1</sup> H-NMR spectrum (800 MHz, CDCl <sub>3</sub> ) | 31 |
| Diplopterol ( <b>35</b> )                | <sup>1</sup> H-NMR spectrum (800 MHz, CDCl <sub>3</sub> ) | 32 |
| Diploptene ( <b>36</b> )                 | <sup>1</sup> H-NMR spectrum (800 MHz, CDCl <sub>3</sub> ) | 33 |
| Moretene ( <b>37</b> )                   | <sup>1</sup> H-NMR spectrum (800 MHz, CDCl <sub>3</sub> ) | 34 |
| Motiene ( <b>38</b> )                    | <sup>1</sup> H-NMR spectrum (800 MHz, CDCl <sub>3</sub> ) | 35 |
| Eupha-7-24-diene ( <b>39</b> )           | <sup>1</sup> H-NMR spectrum (600 MHz, CDCl <sub>3</sub> ) | 36 |
| $\alpha$ -Polypodatetraene ( <b>40</b> ) | <sup>1</sup> H-NMR spectrum (600 MHz, CDCl <sub>3</sub> ) | 37 |
| $\gamma$ -Polypodatetraene ( <b>41</b> ) | <sup>1</sup> H-NMR spectrum (600 MHz, CDCl <sub>3</sub> ) | 38 |
| Tirucalla-7-24-diene ( <b>42</b> )       | <sup>1</sup> H-NMR spectrum (600 MHz, CDCl <sub>3</sub> ) | 39 |

$^1\text{H-NMR}$  spectrum (600 MHz,  $\text{CDCl}_3$ )

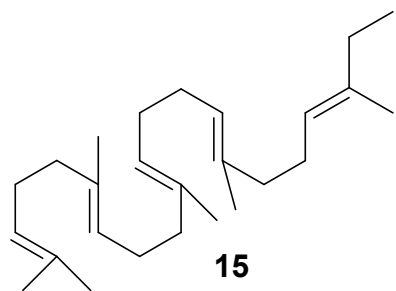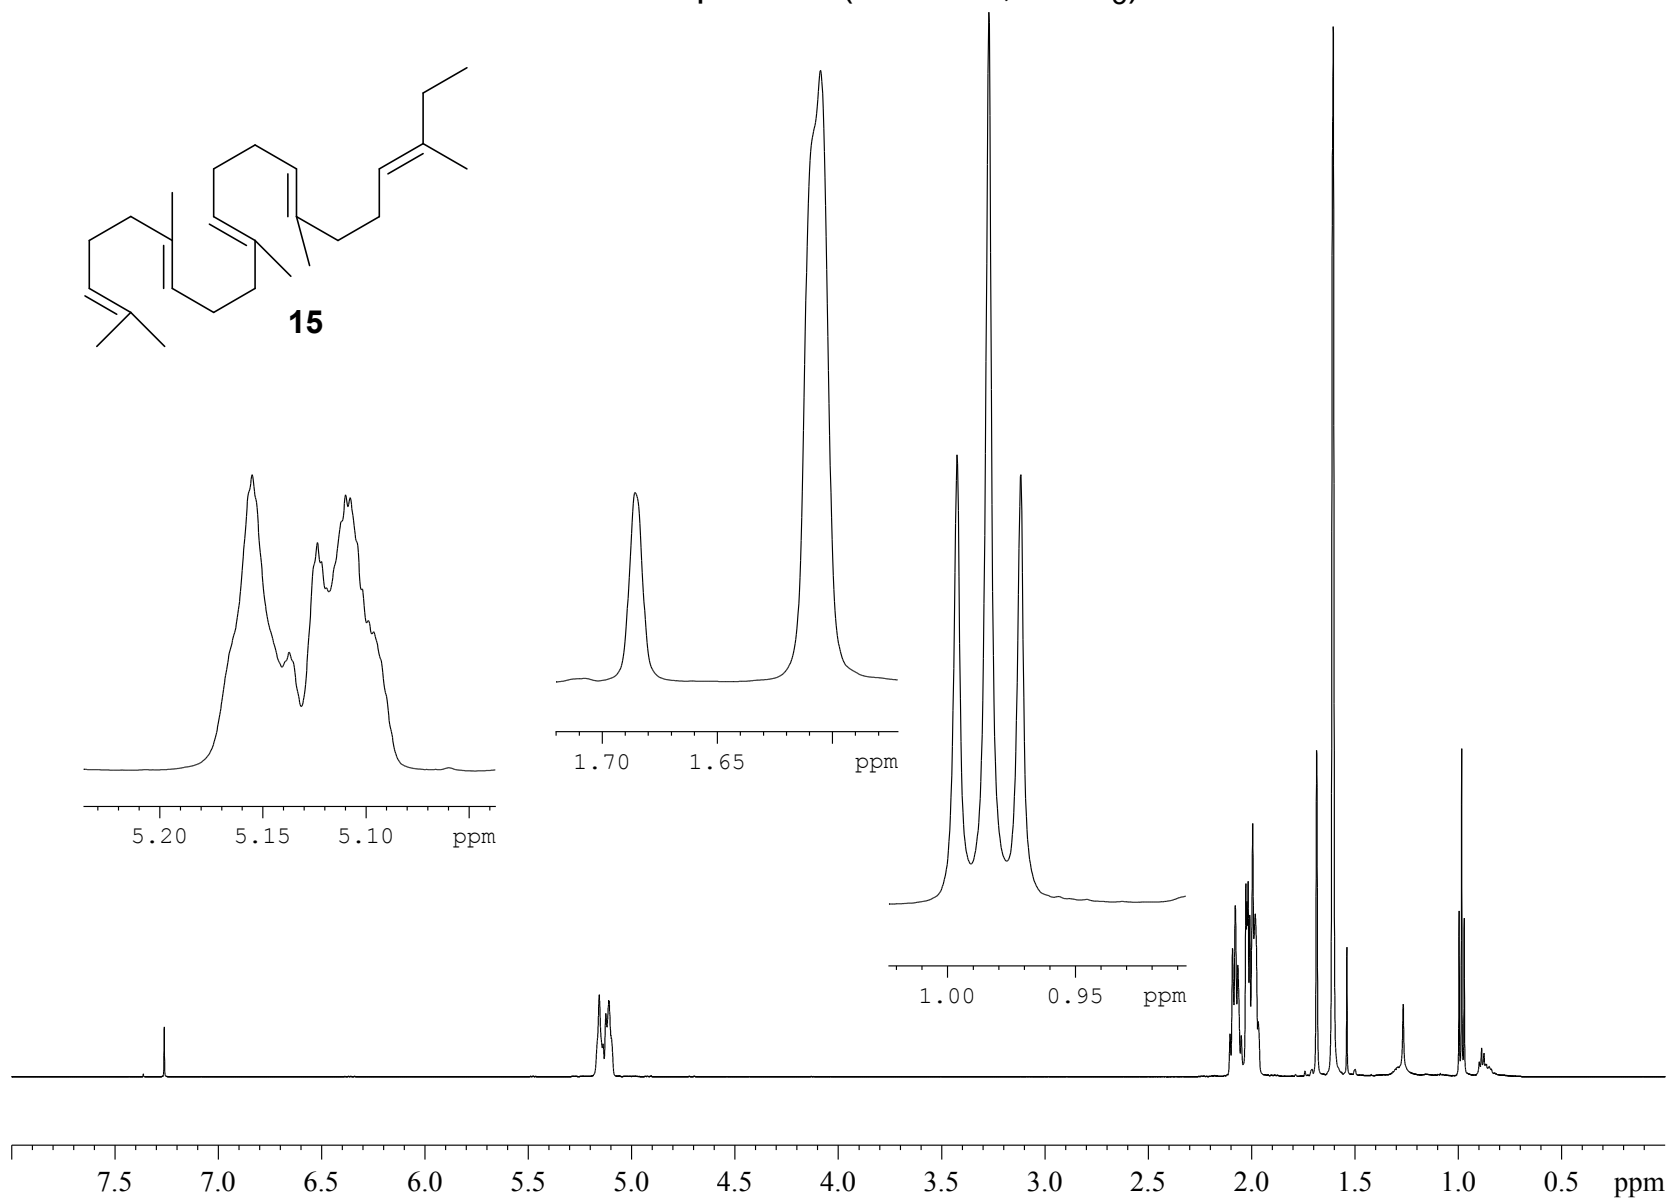

<sup>1</sup>H-NMR spectrum (600 MHz, C<sub>6</sub>D<sub>6</sub>)

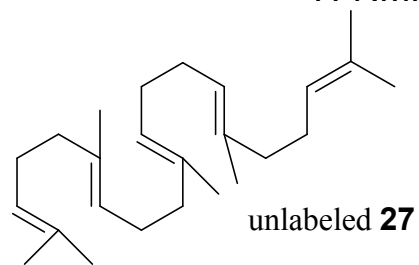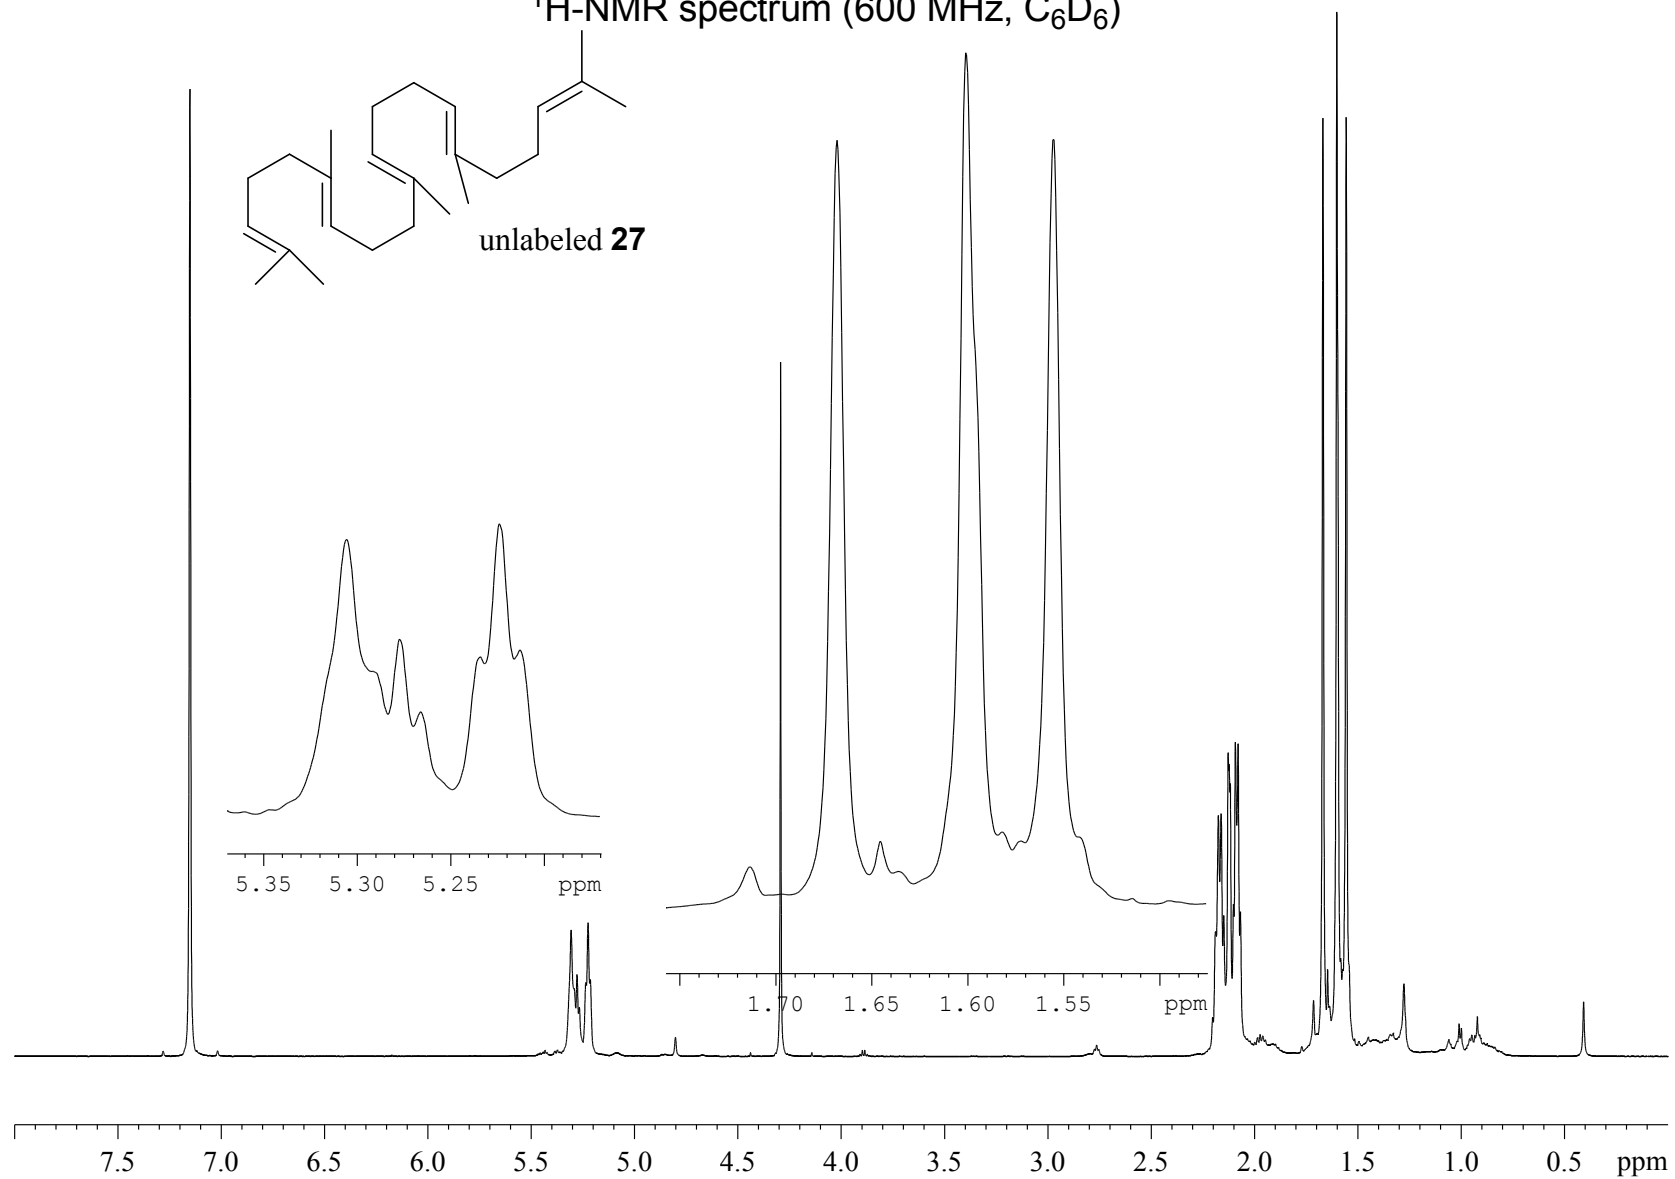

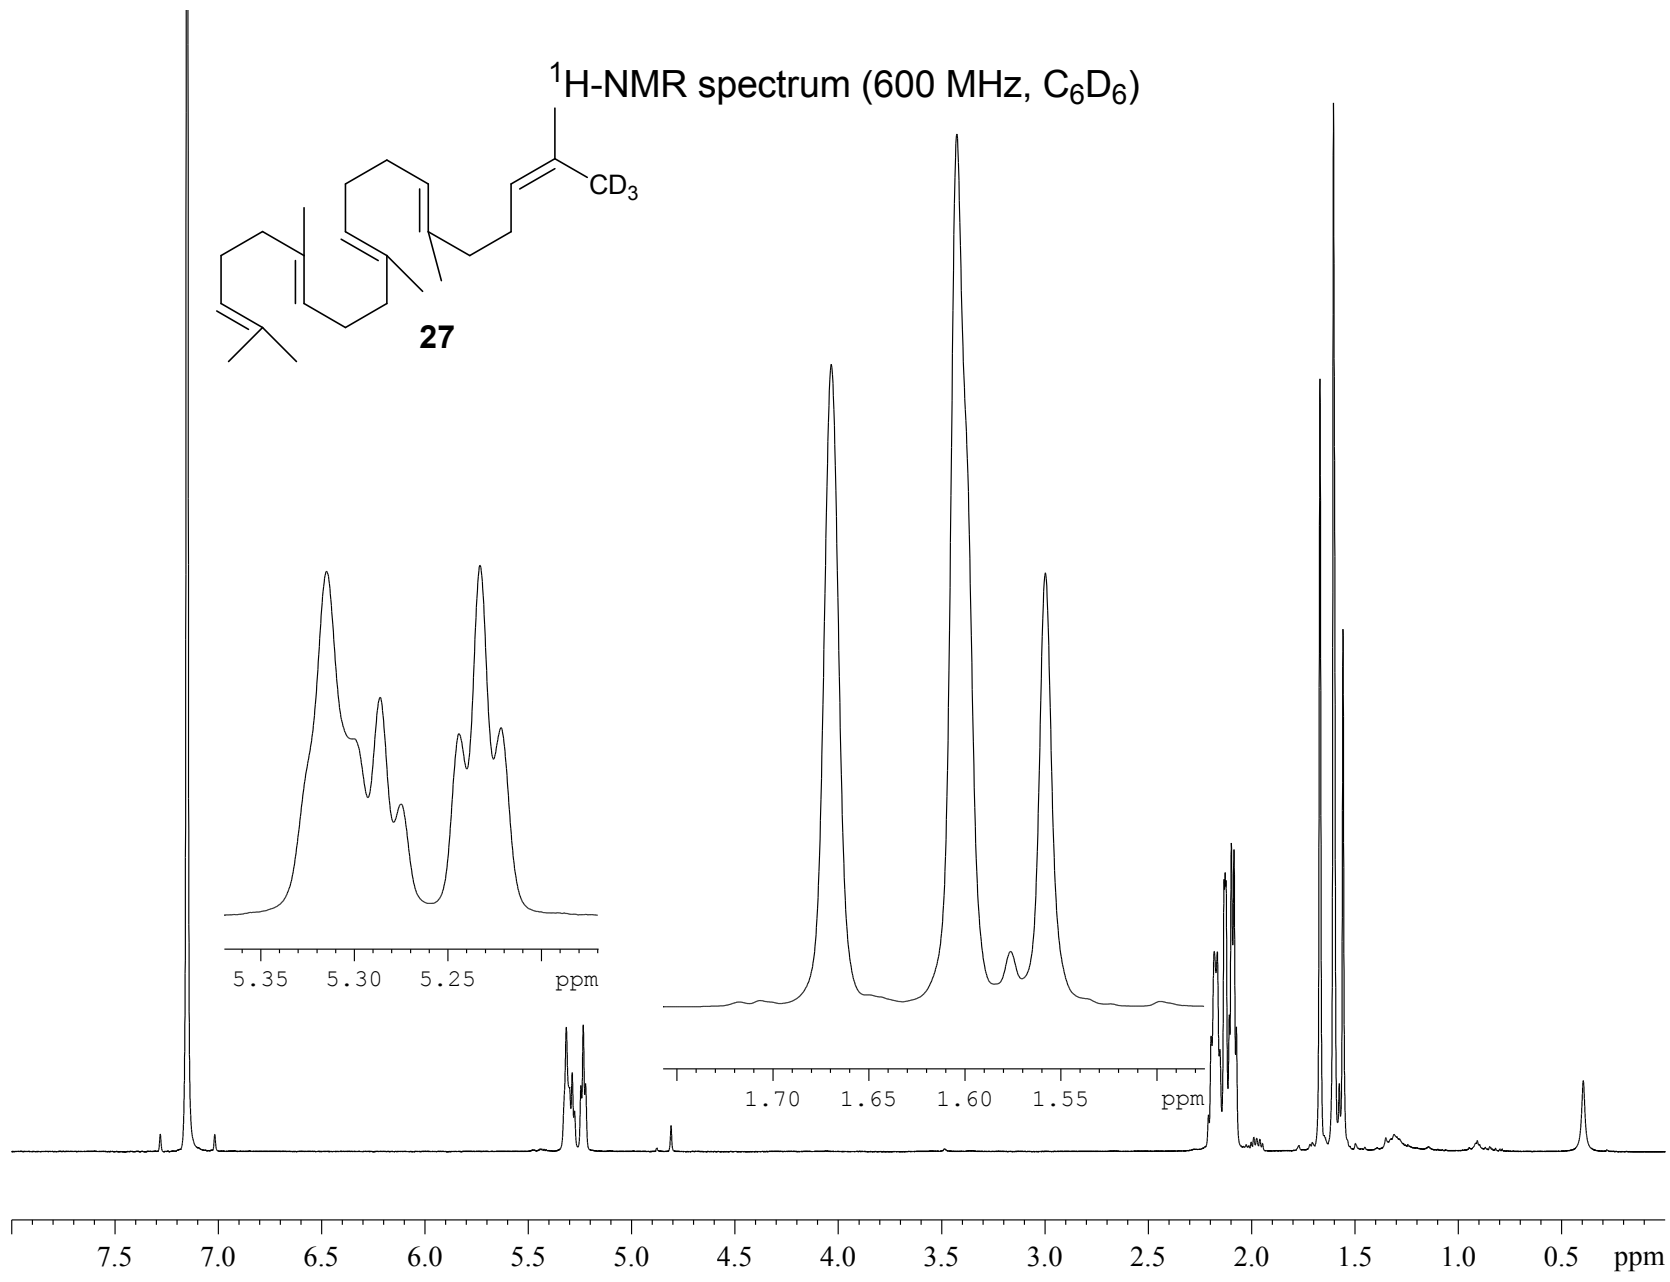

$^2\text{H}$ -NMR spectrum (92 MHz,  $\text{C}_6\text{H}_6 + 1\% \text{C}_6\text{D}_6$ )

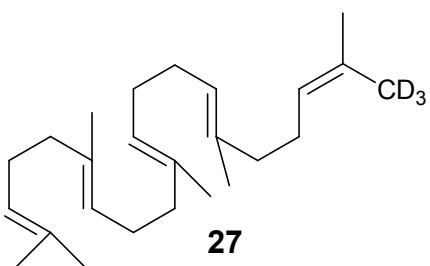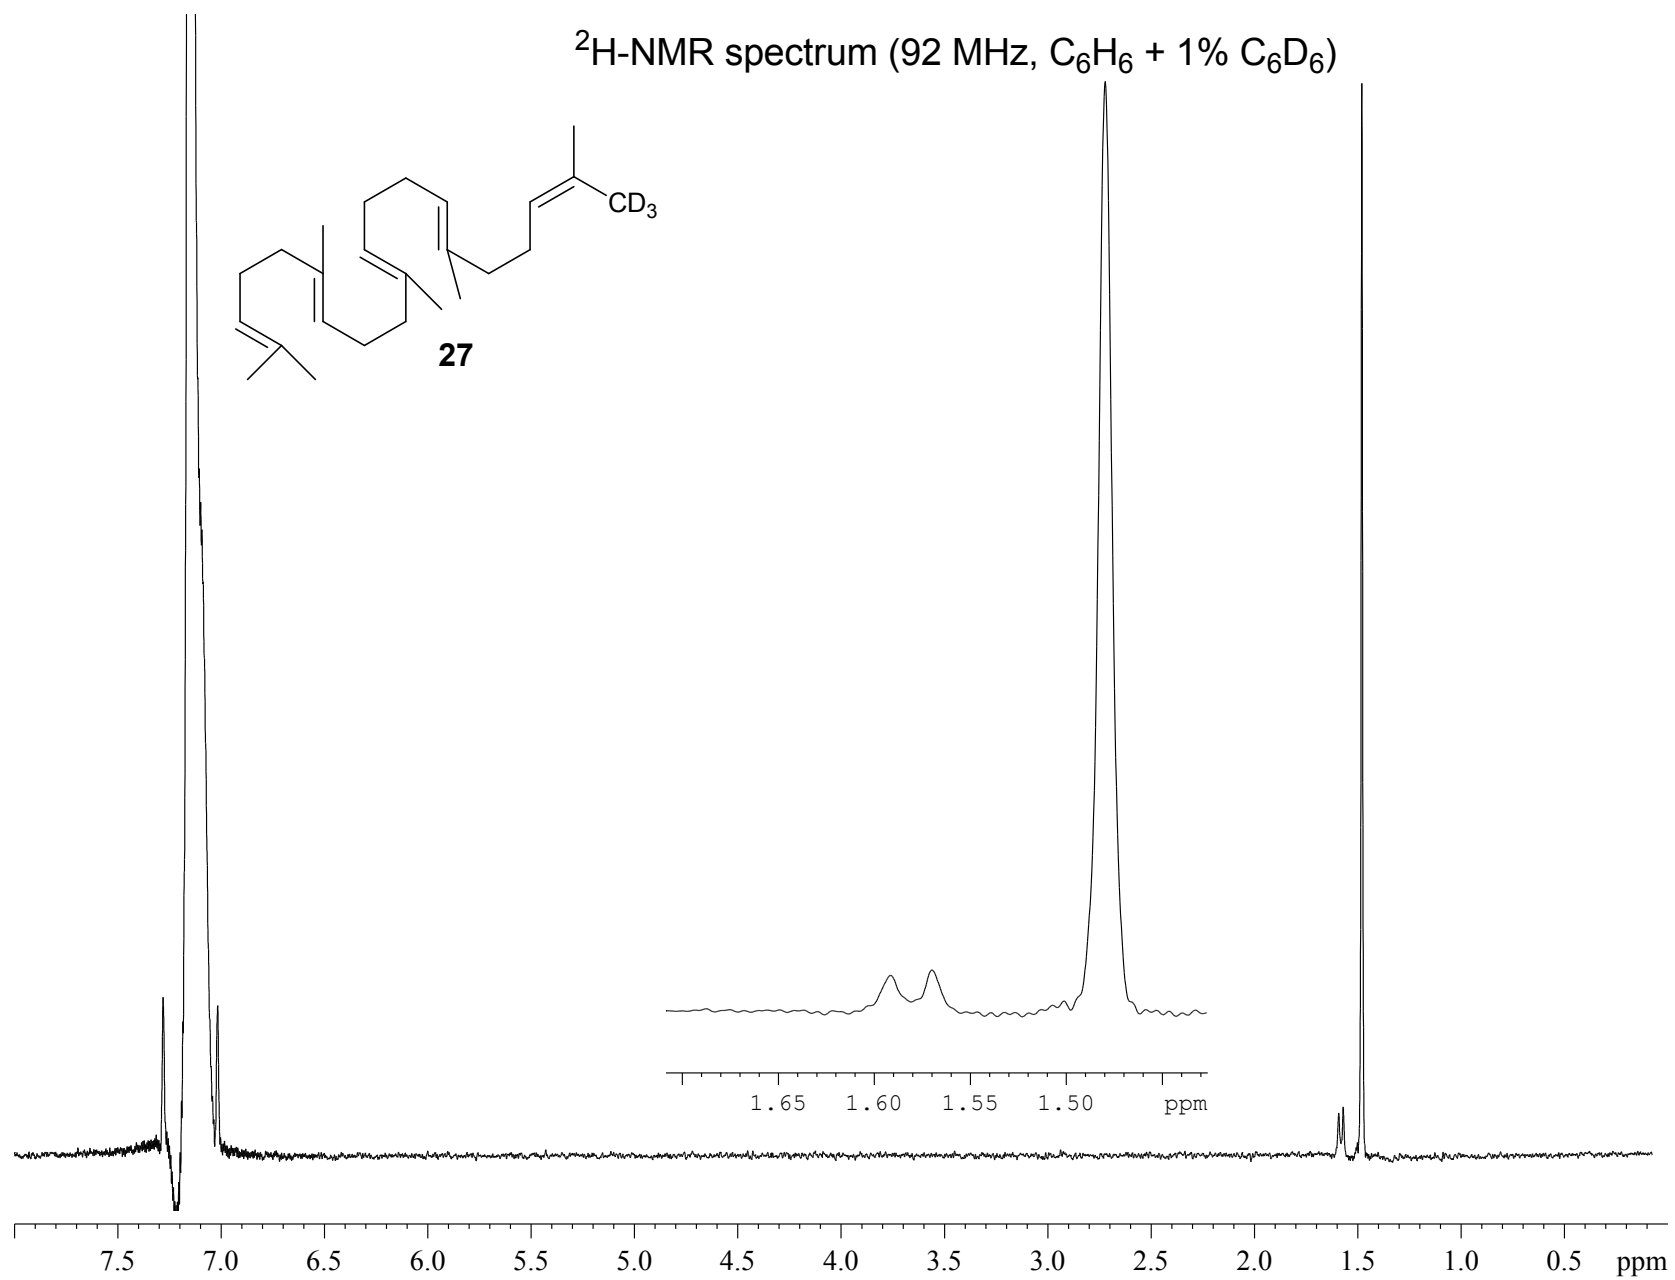

$^1\text{H-NMR}$  spectrum (600 MHz,  $\text{CDCl}_3$ )

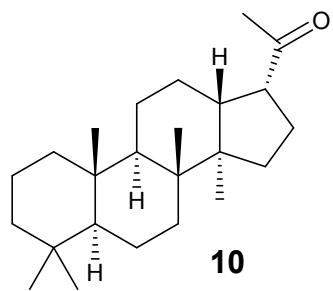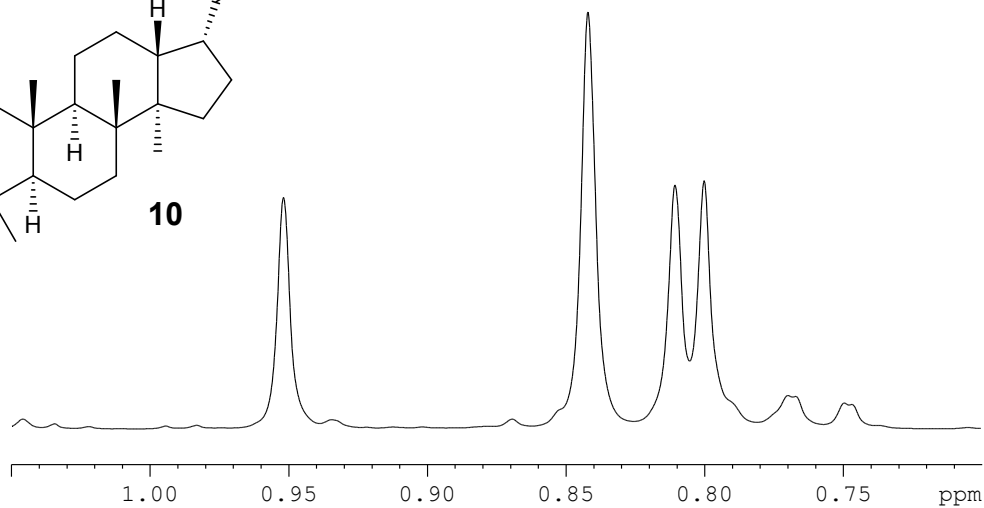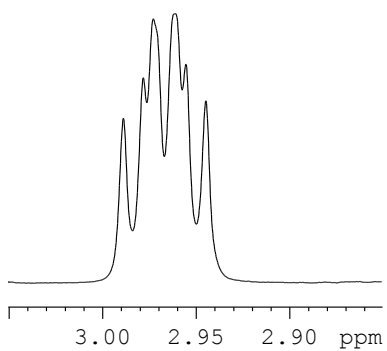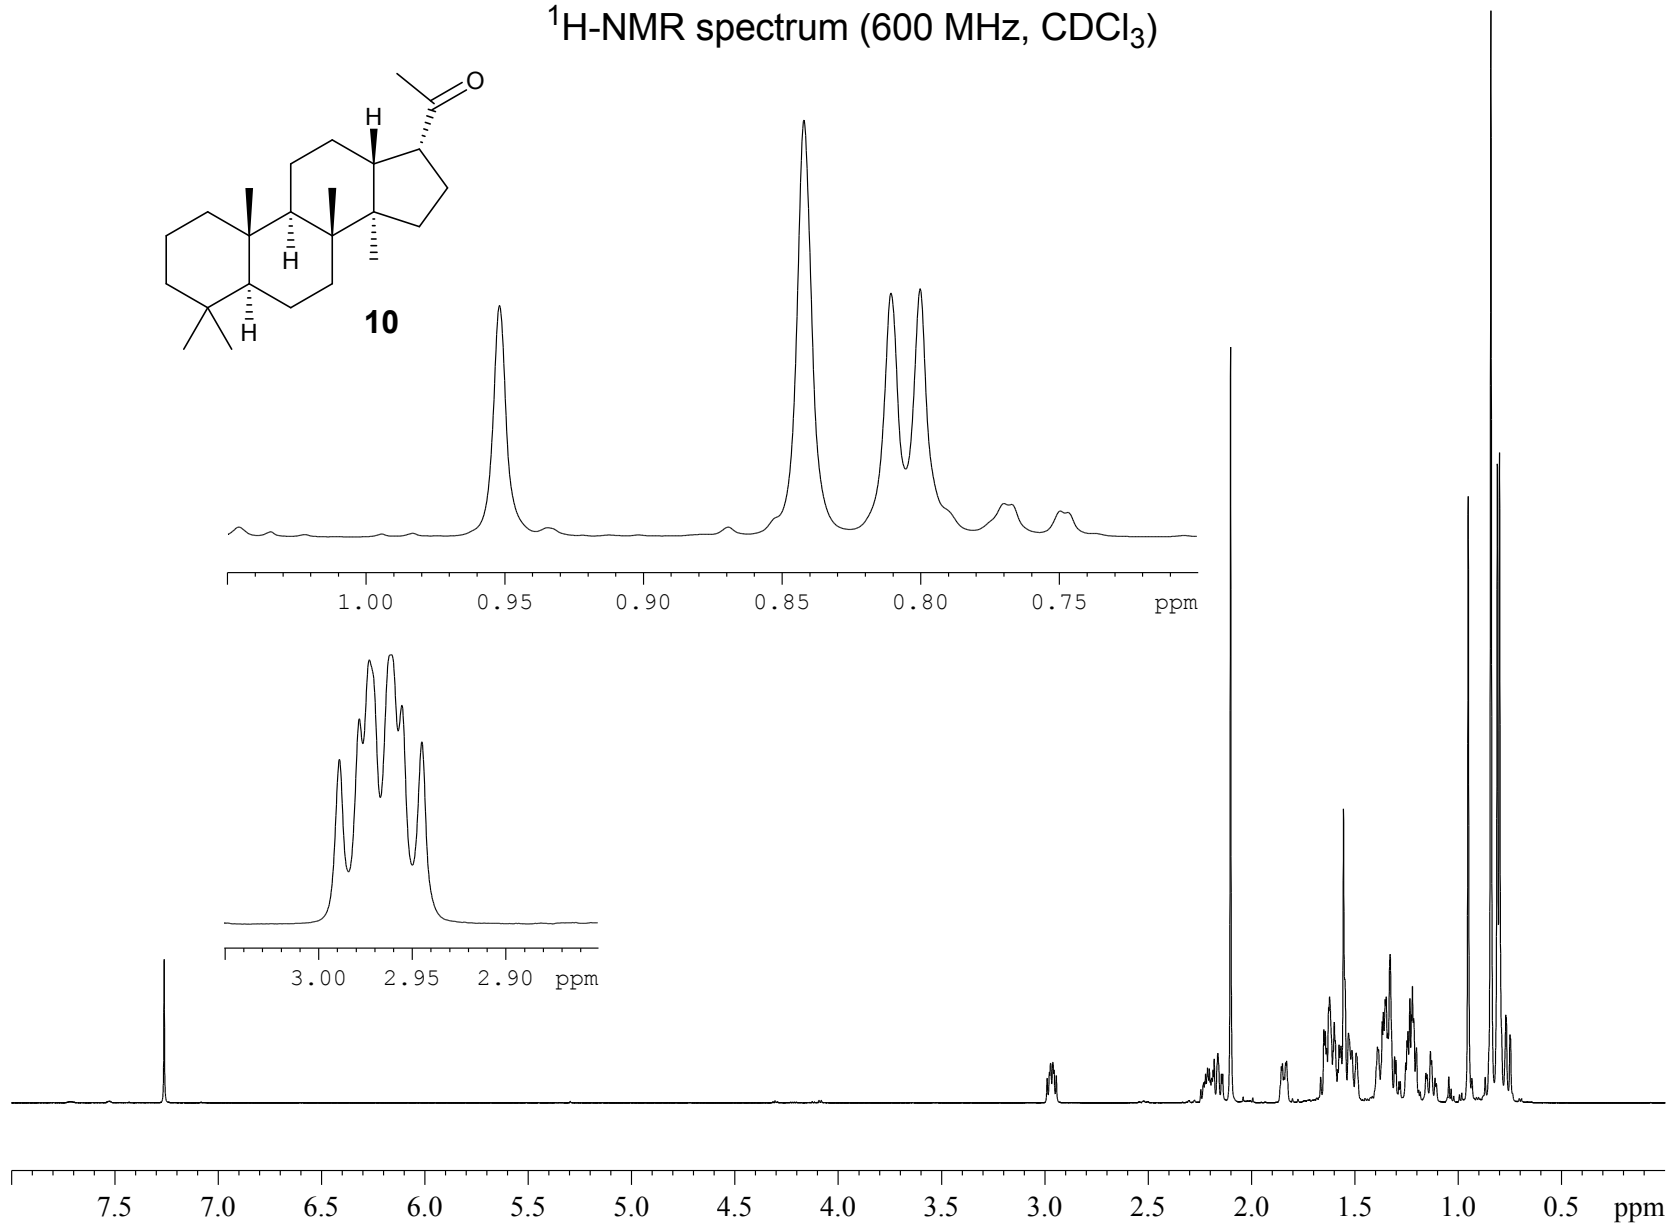

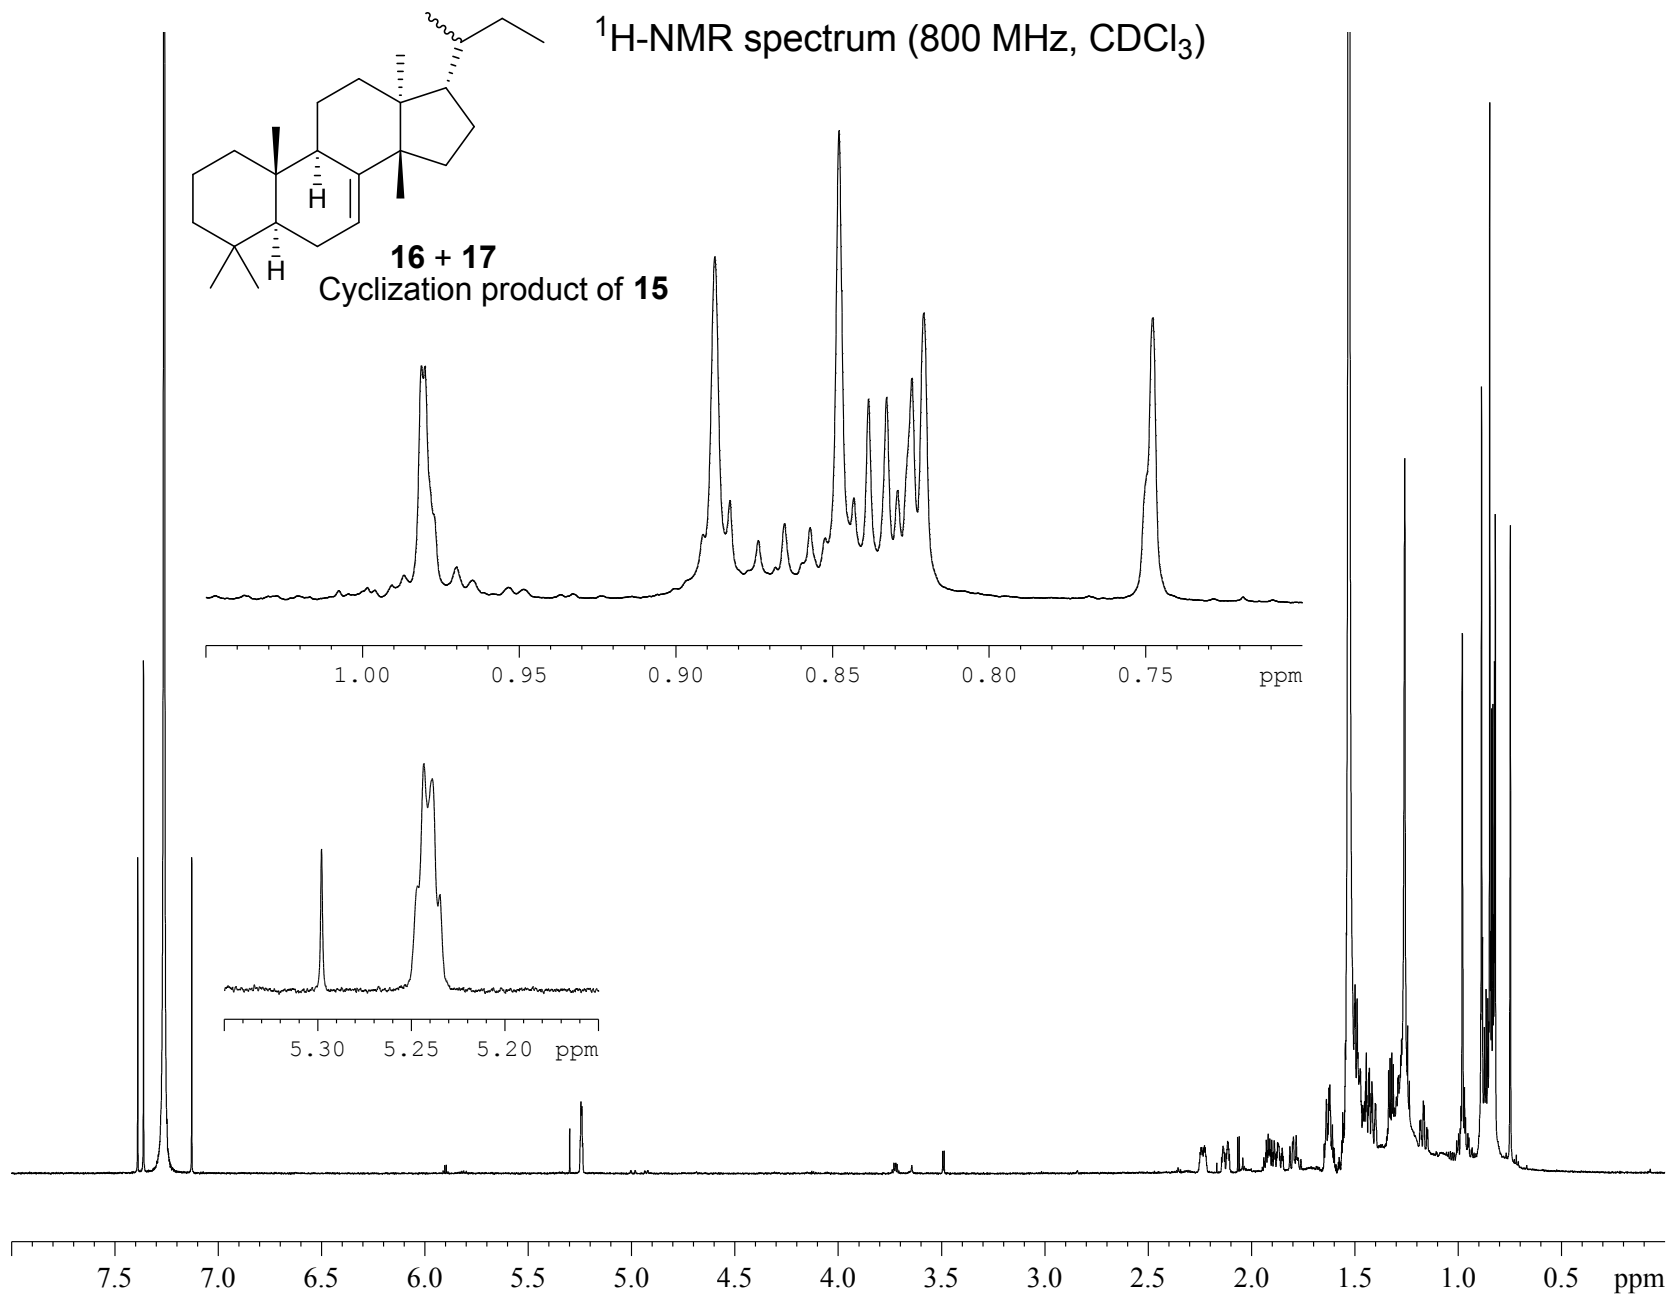

HSQC spectrum Methyl region (800 MHz, CDCl<sub>3</sub>)

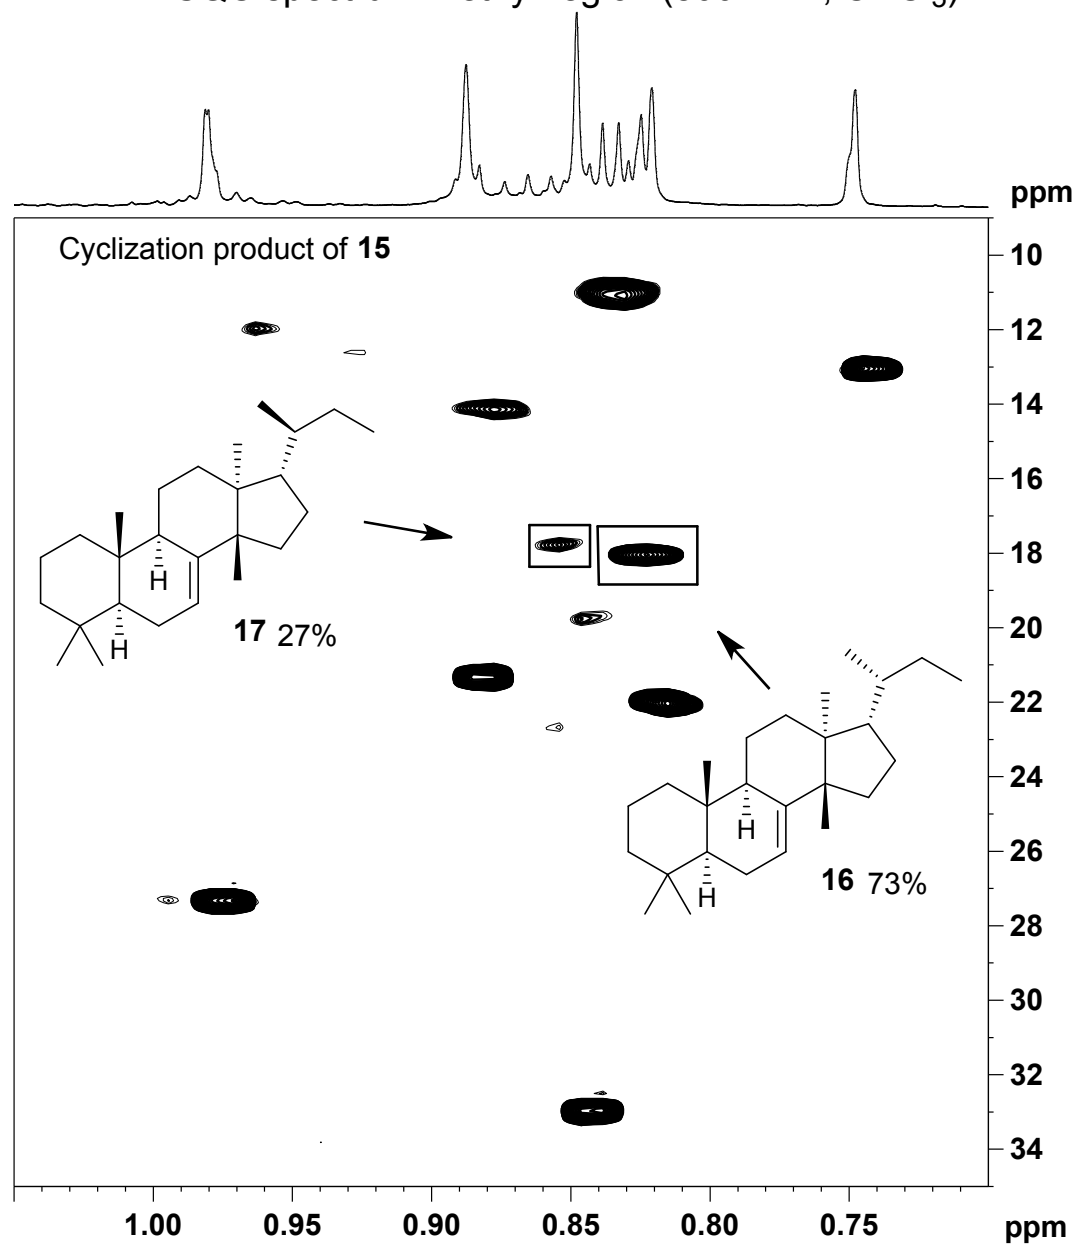



$^1\text{H-NMR}$  spectrum (800 MHz,  $\text{CDCl}_3$ )

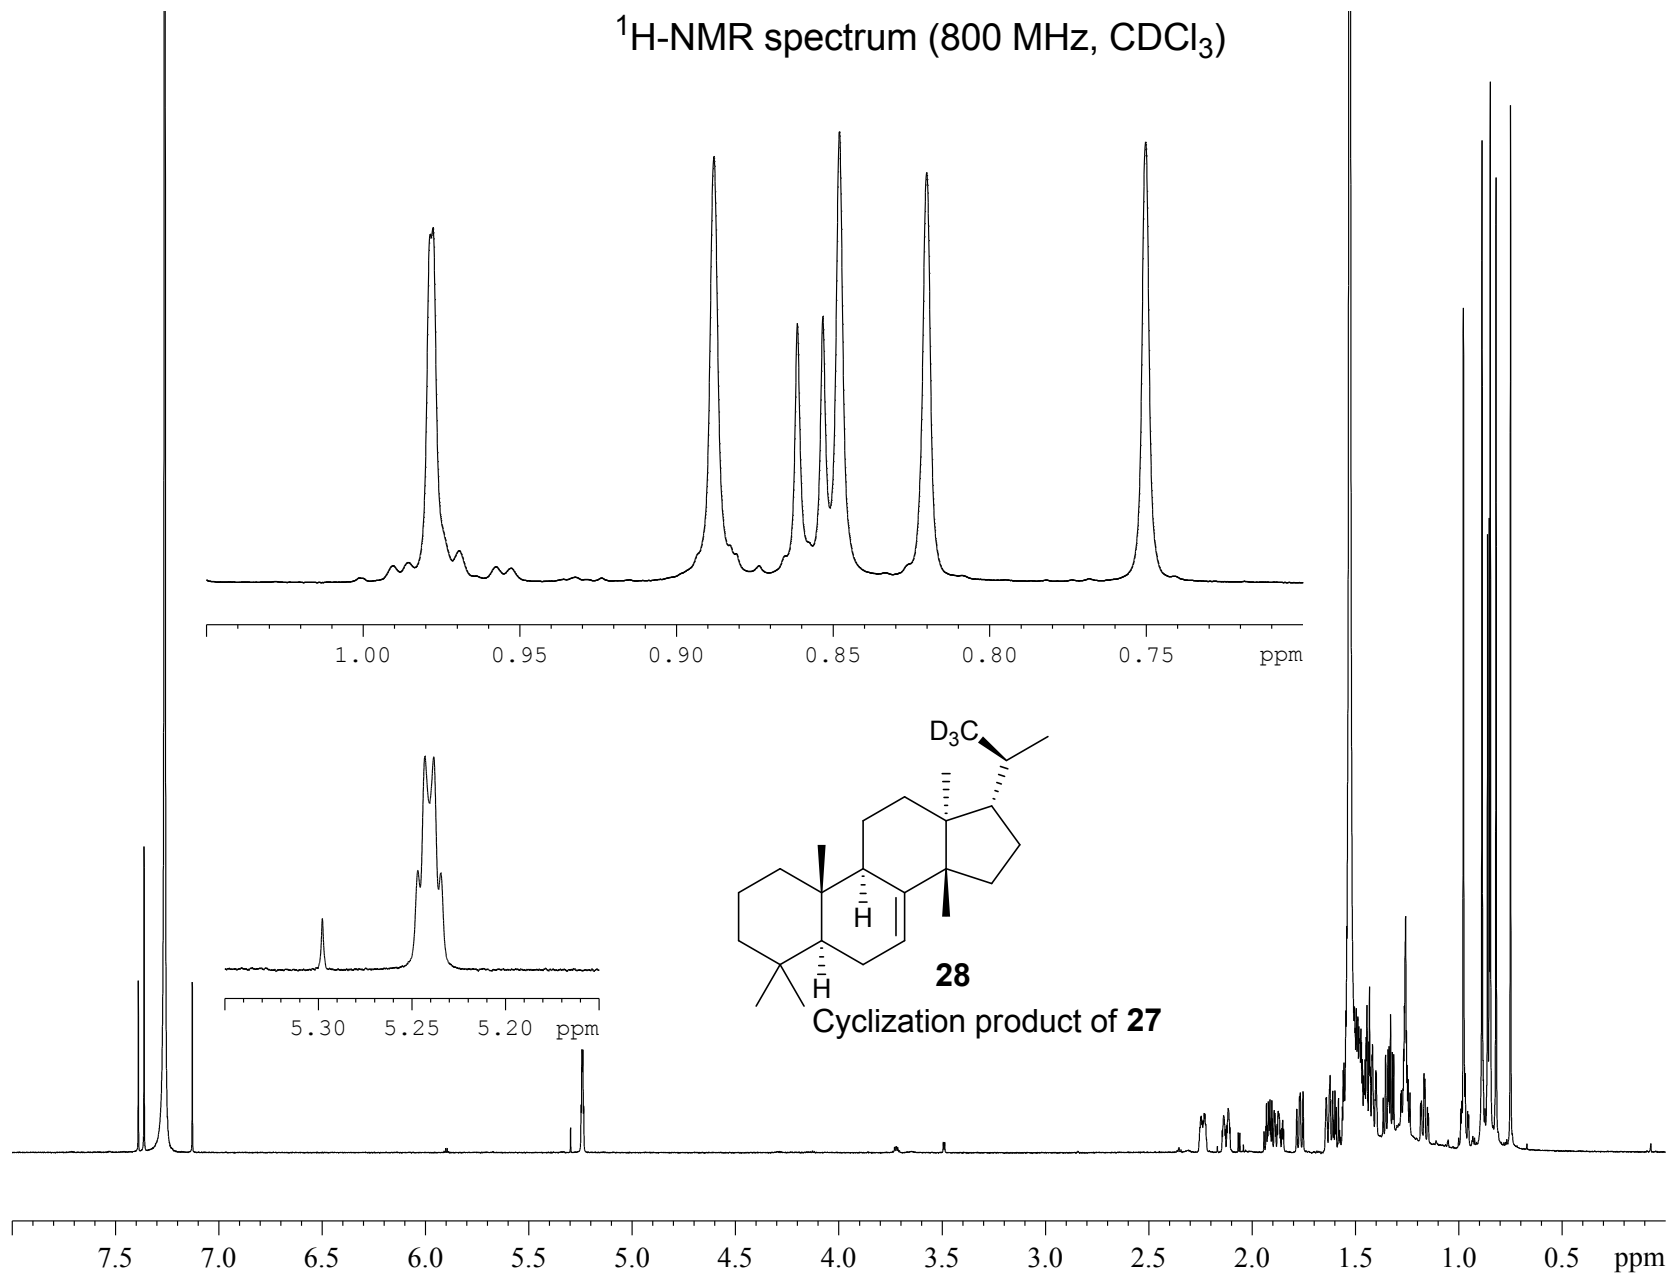

HSQC spectrum Methyl region (800 MHz, CDCl<sub>3</sub>)

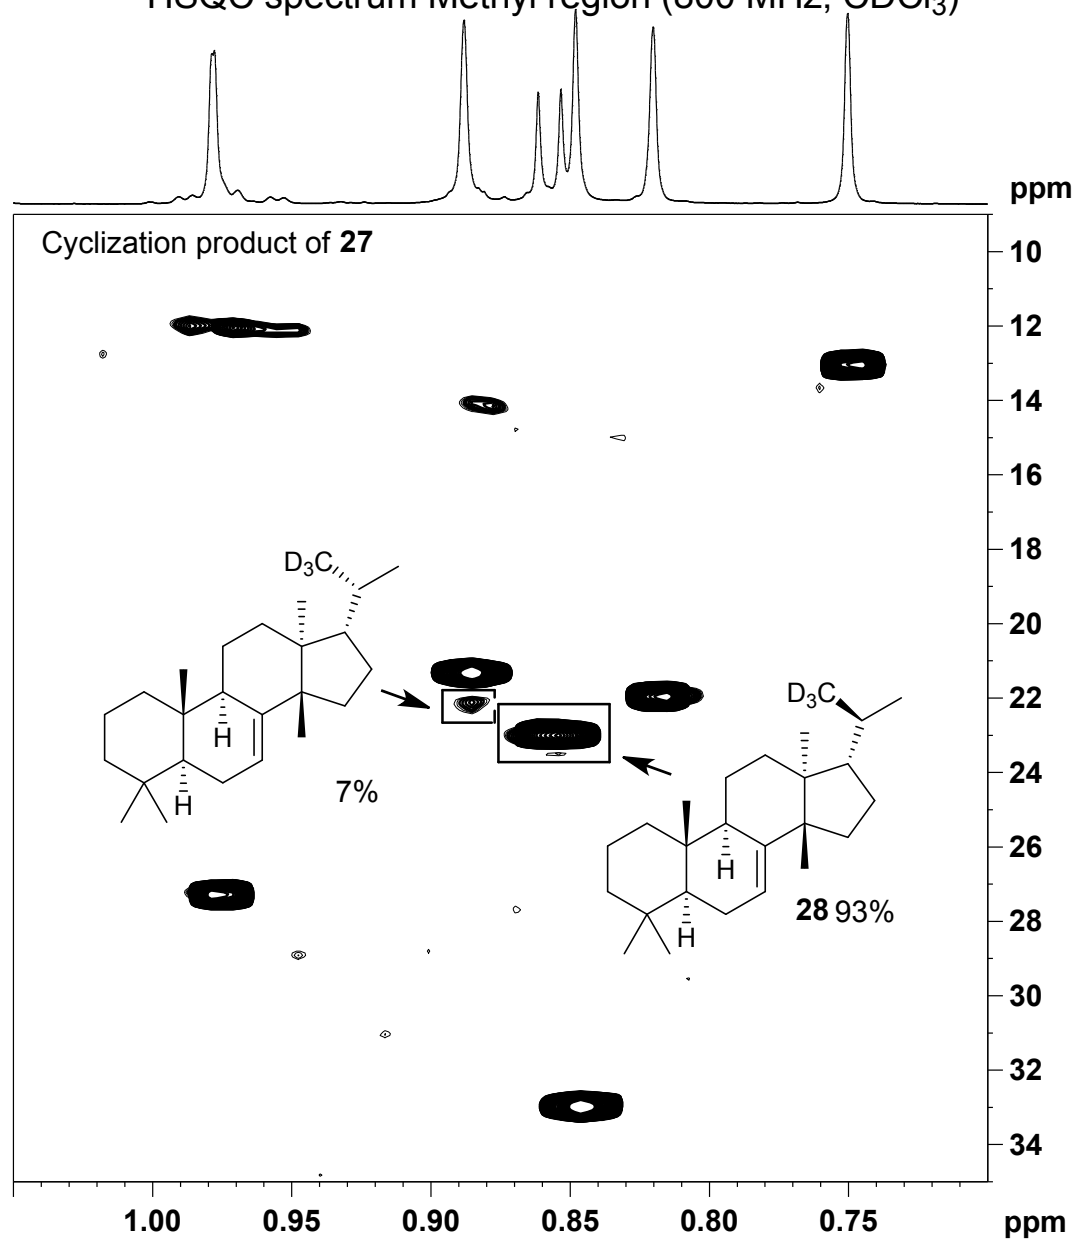

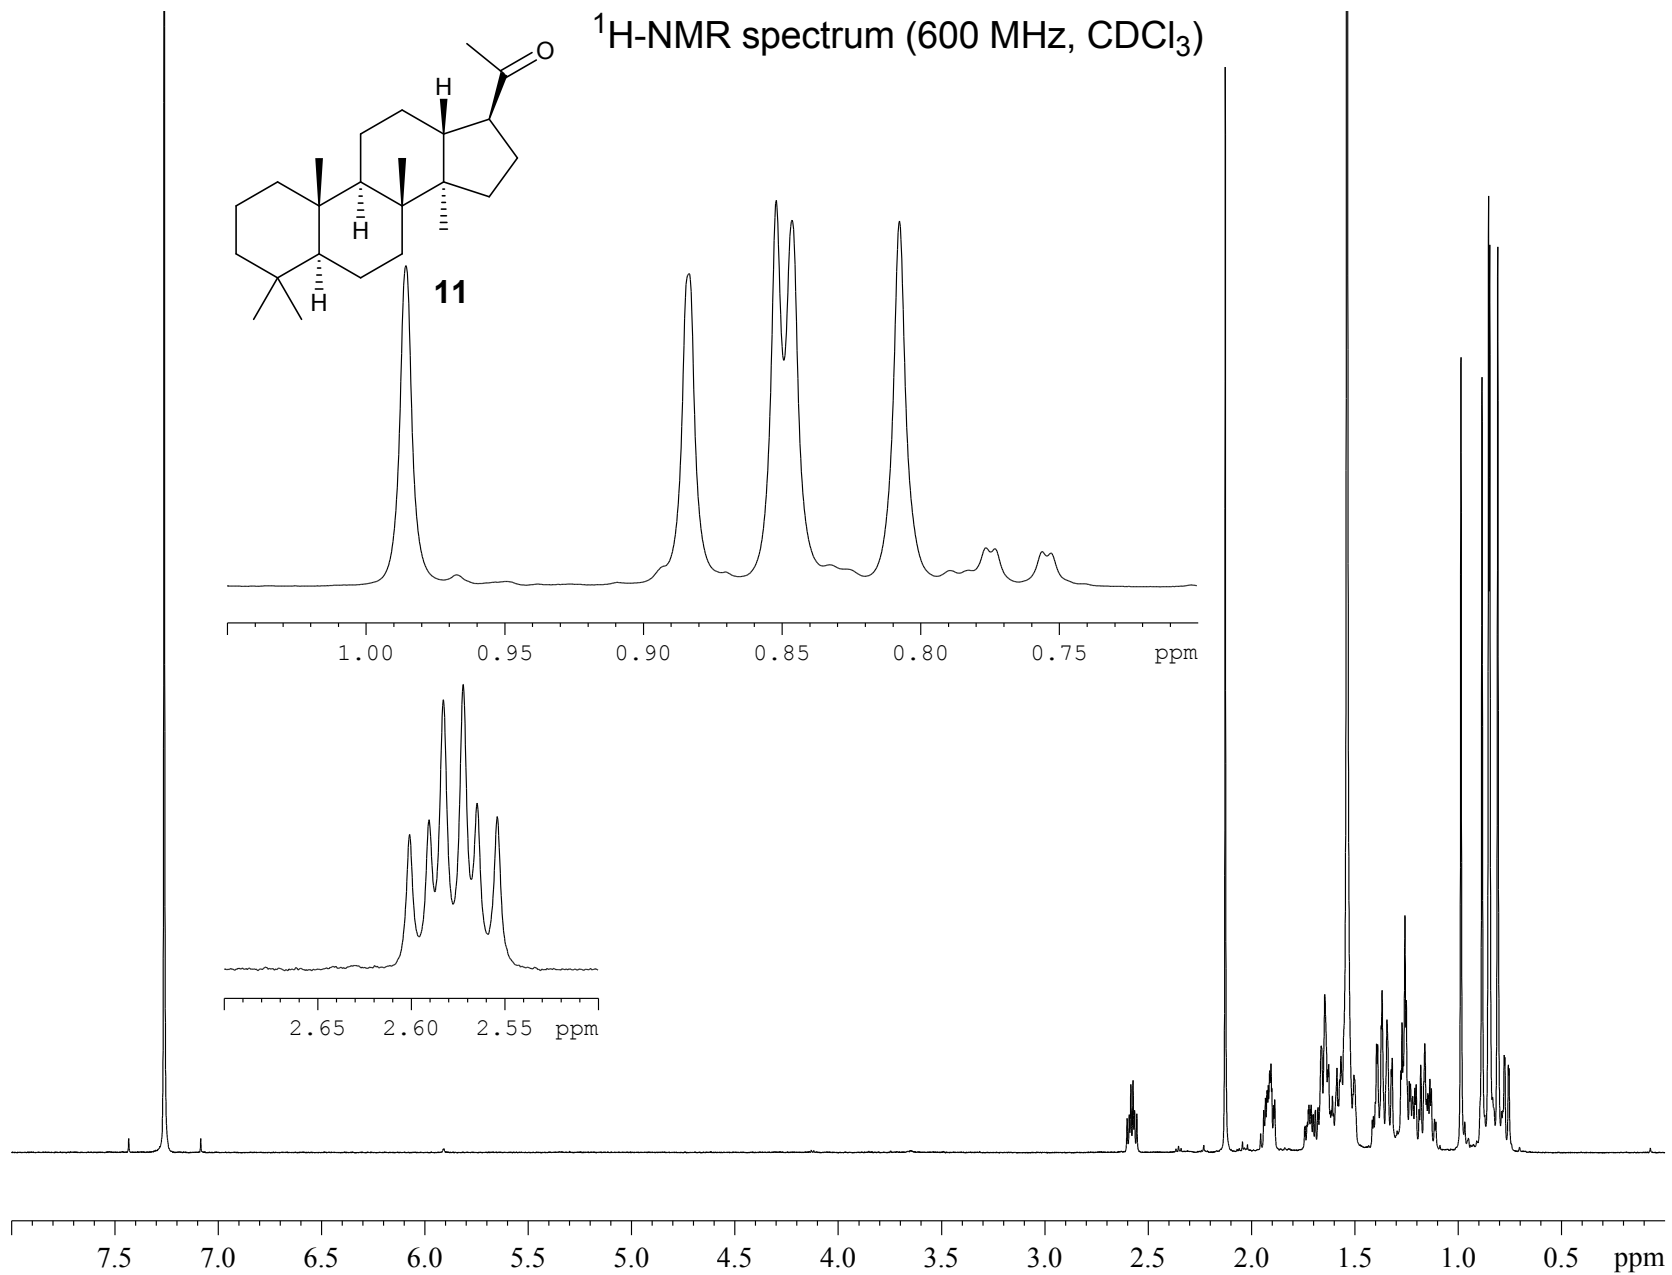

<sup>1</sup>H-NMR spectrum (600 MHz, CDCl<sub>3</sub>)

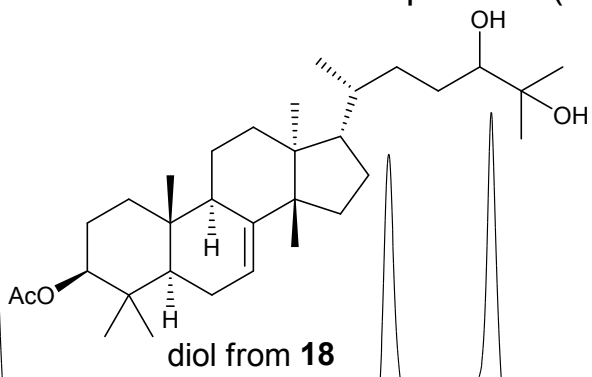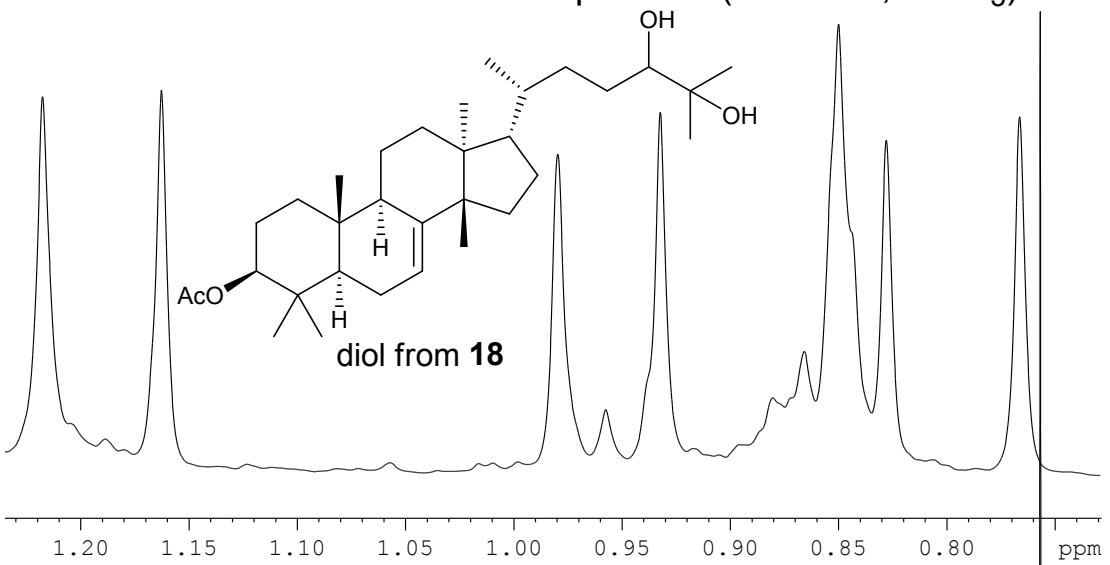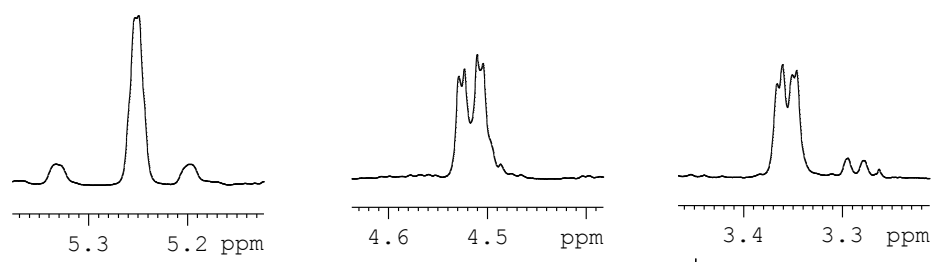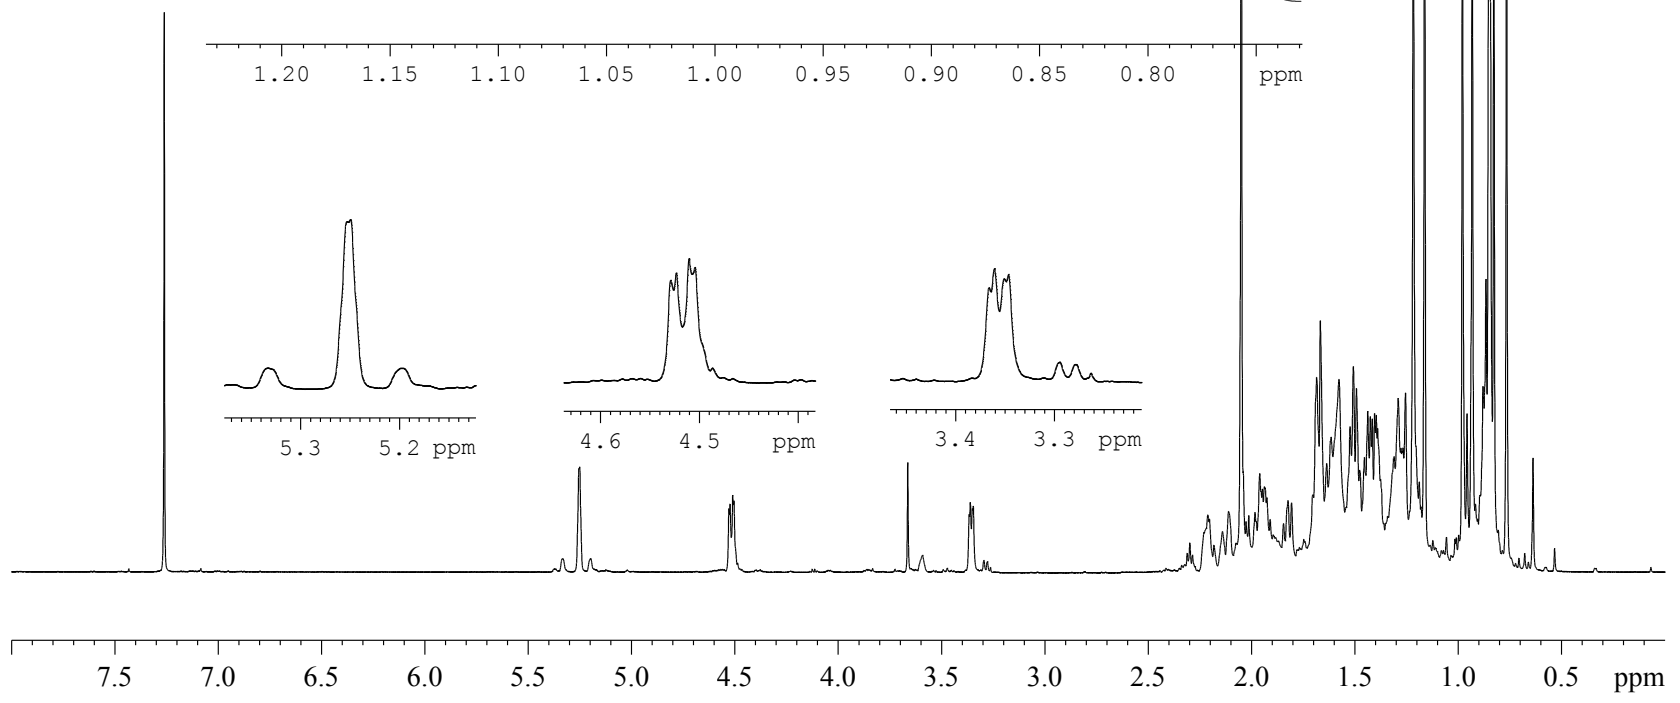

<sup>1</sup>H-NMR spectrum (600 MHz, CDCl<sub>3</sub>)

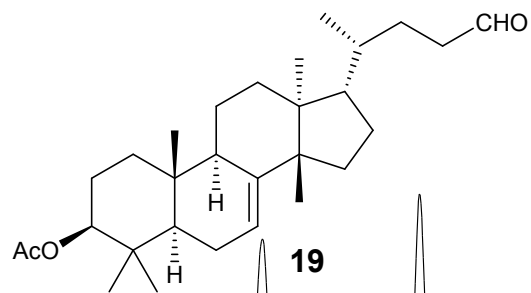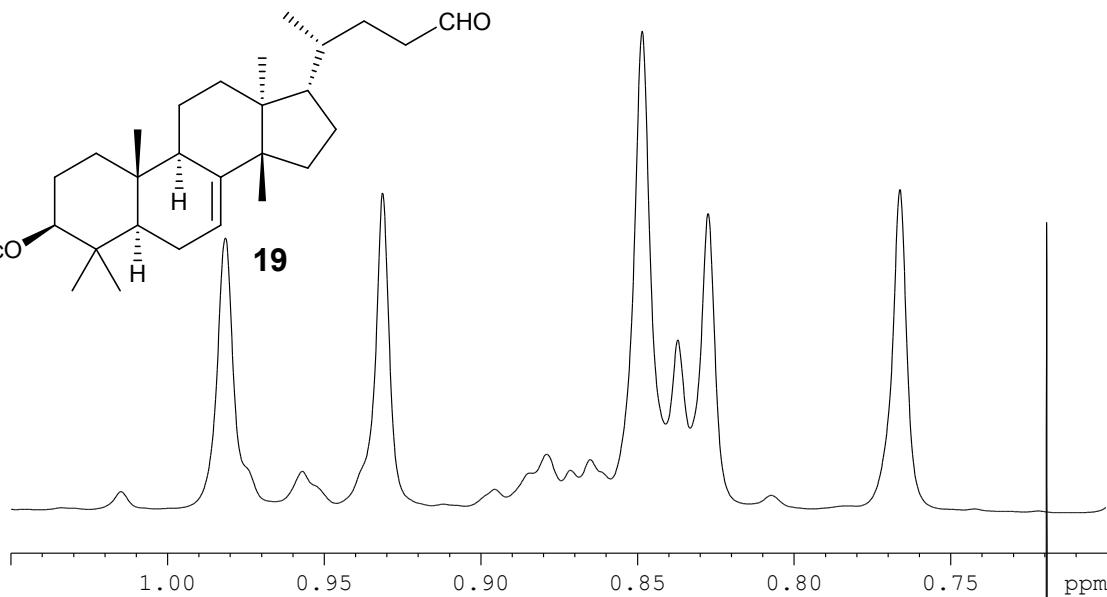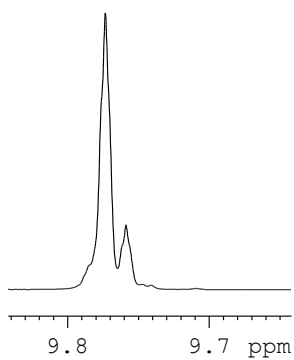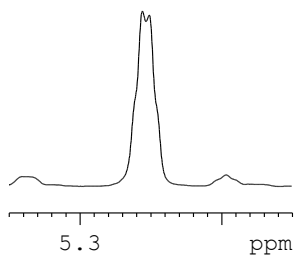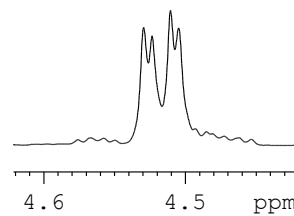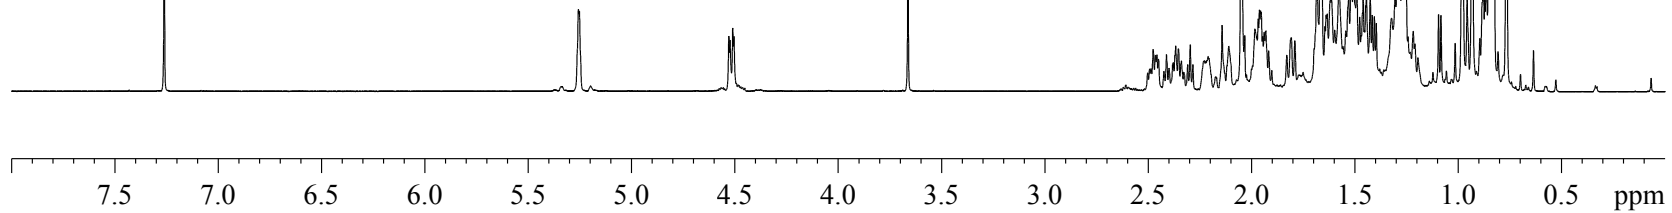

$^1\text{H-NMR}$  spectrum (600 MHz,  $\text{CDCl}_3$ )

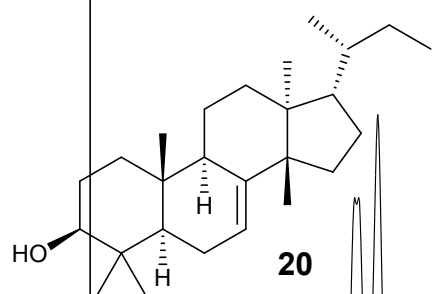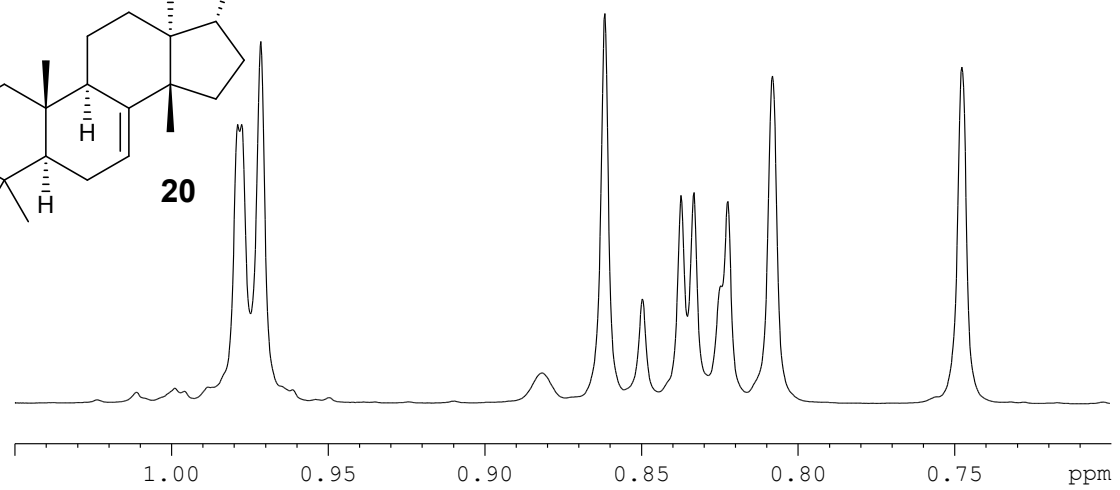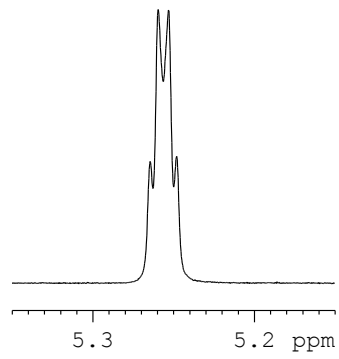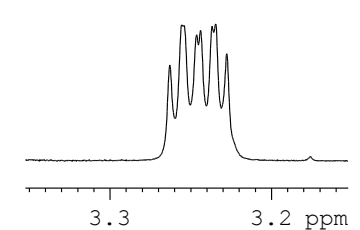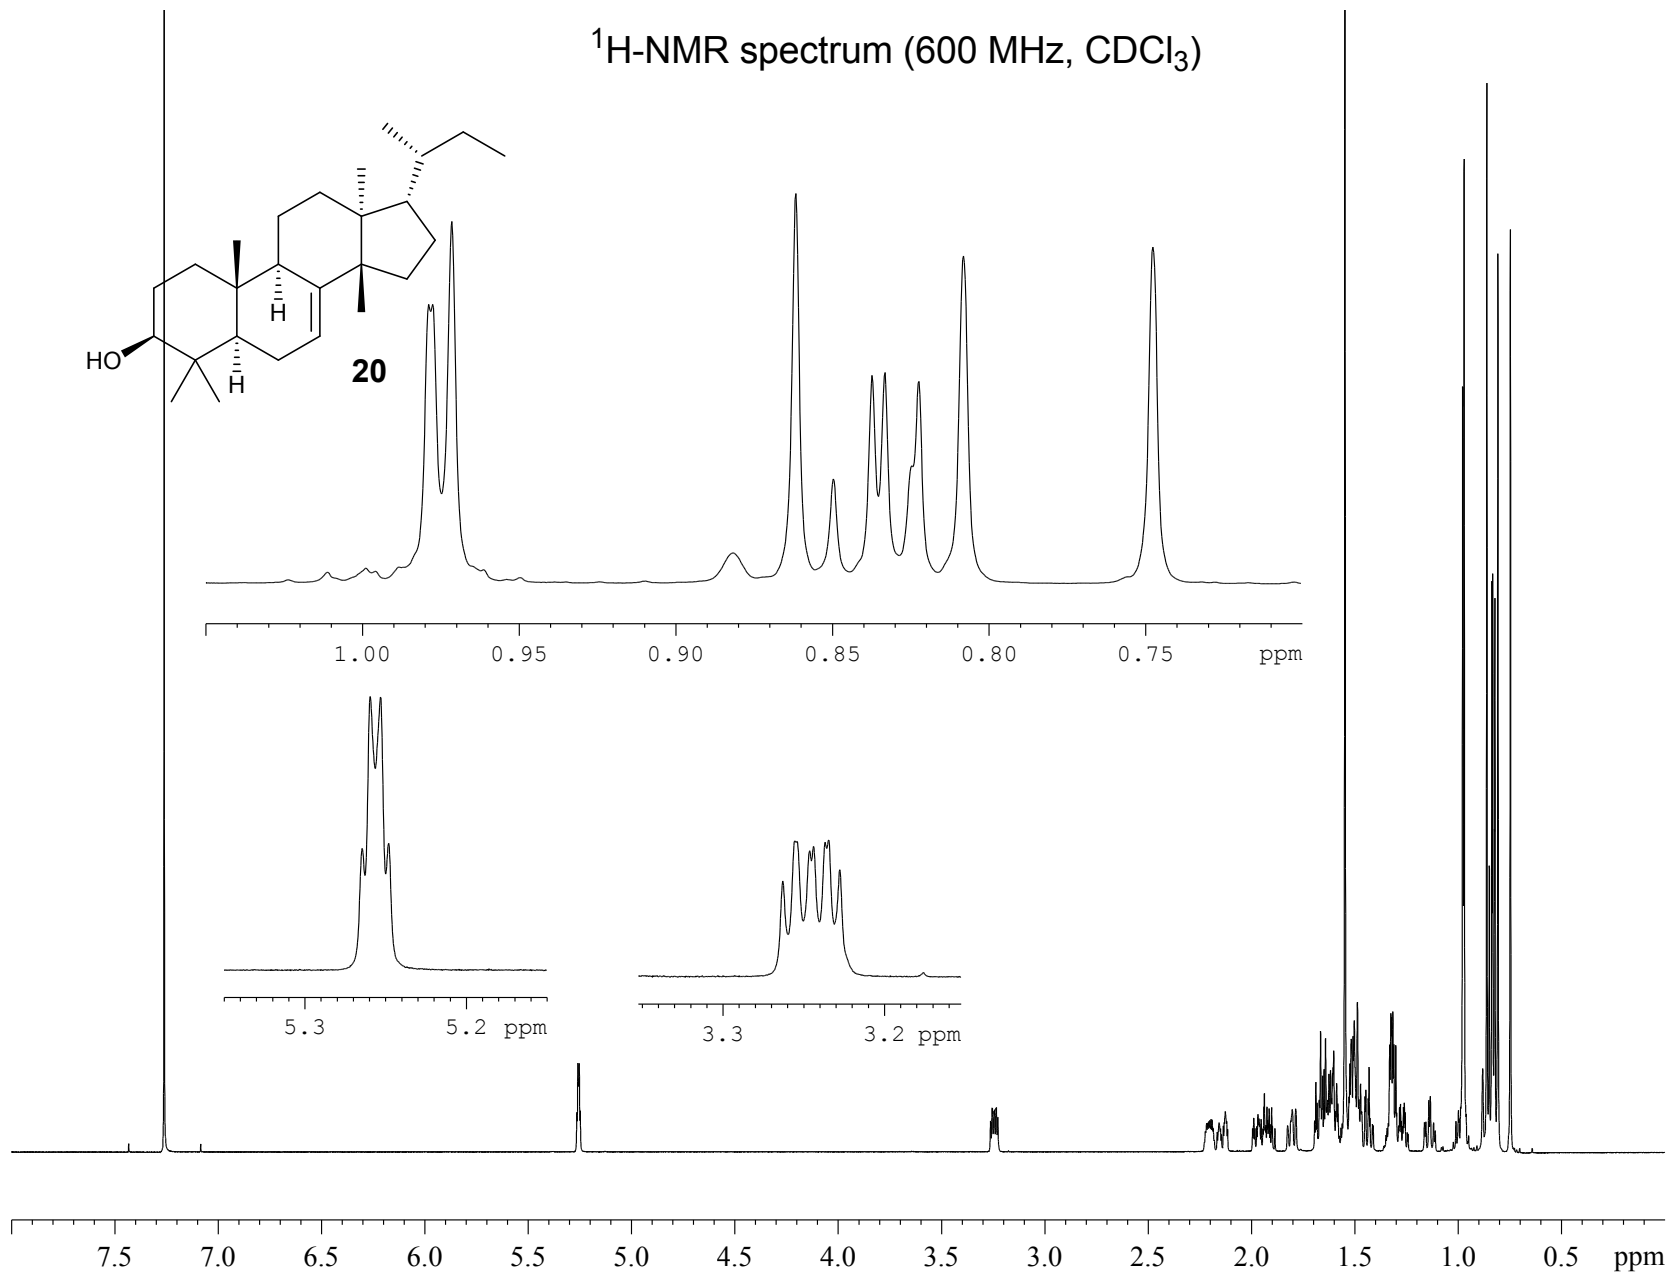

$^1\text{H-NMR}$  spectrum (600 MHz,  $\text{CDCl}_3$ )

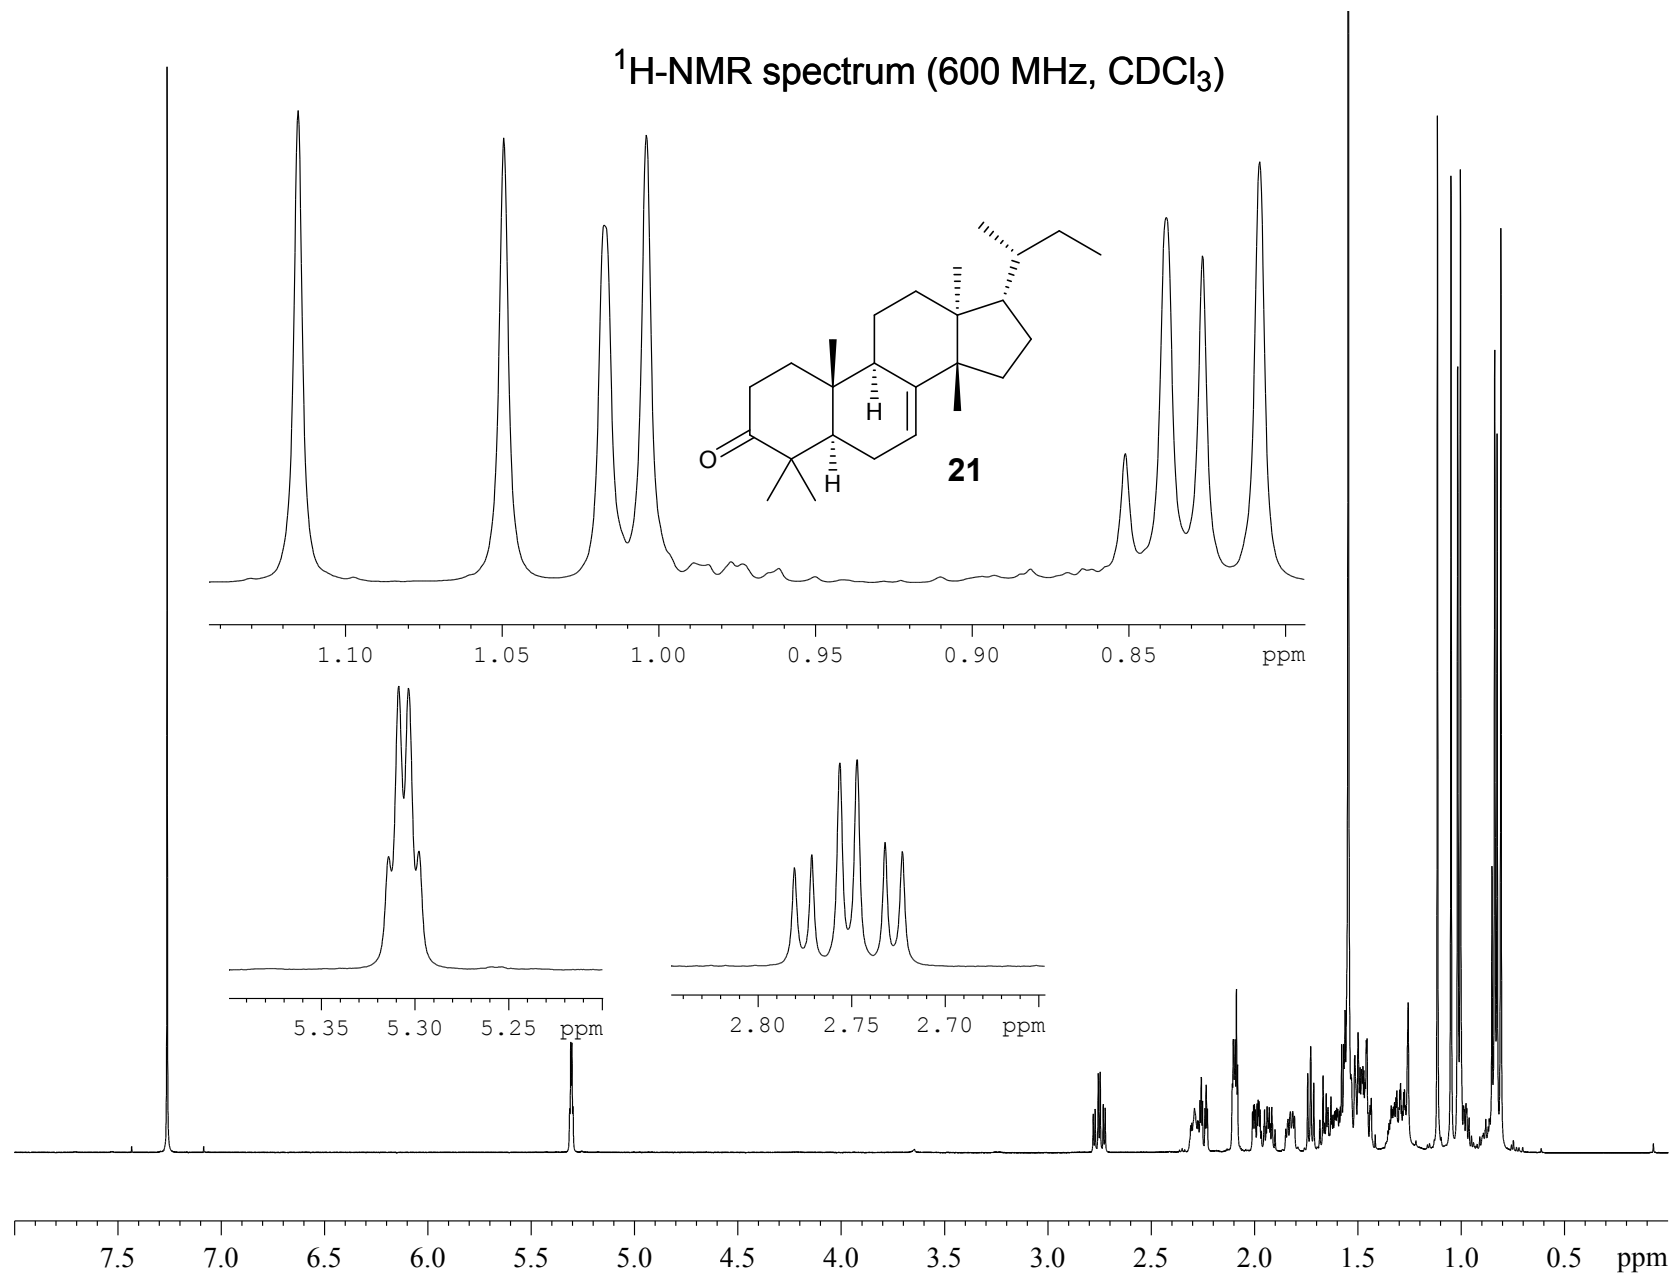

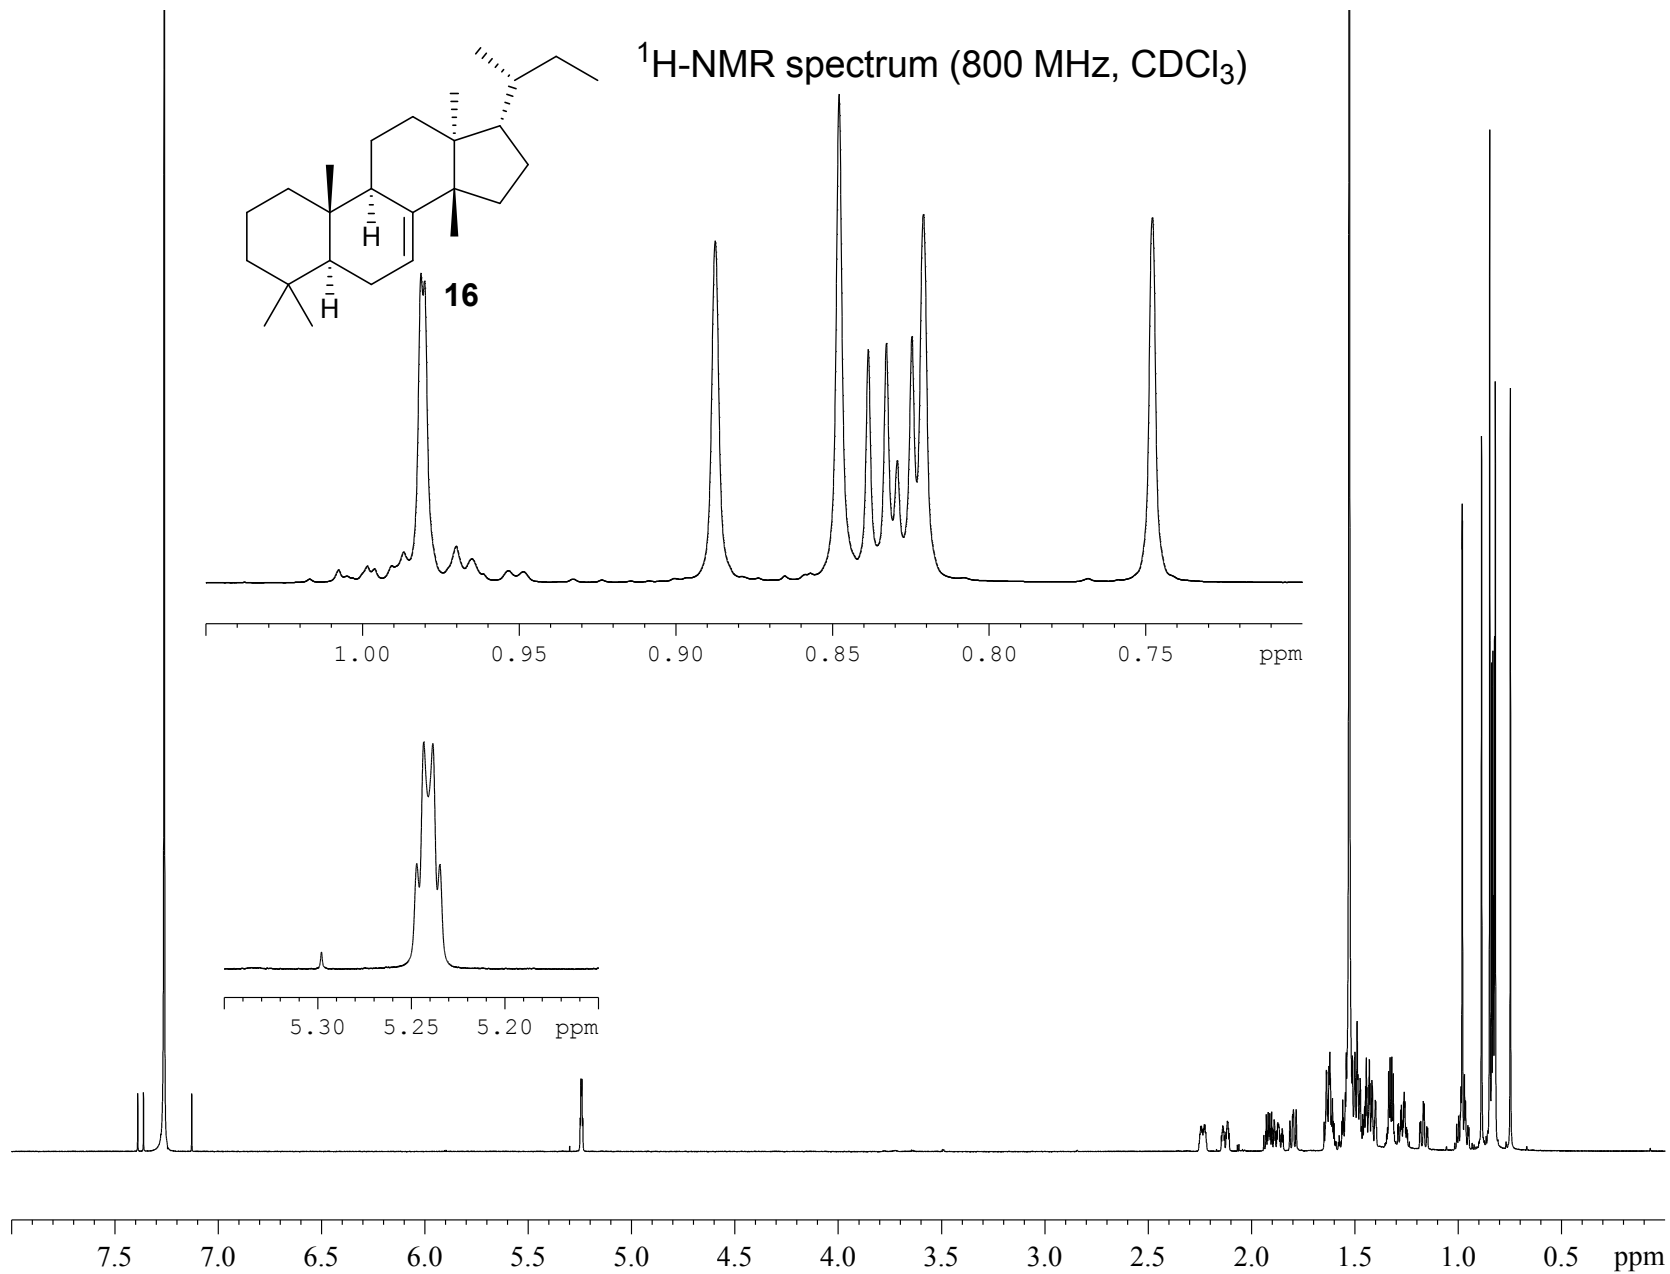



HSQC spectrum Methyl region (800 MHz, CDCl<sub>3</sub>)

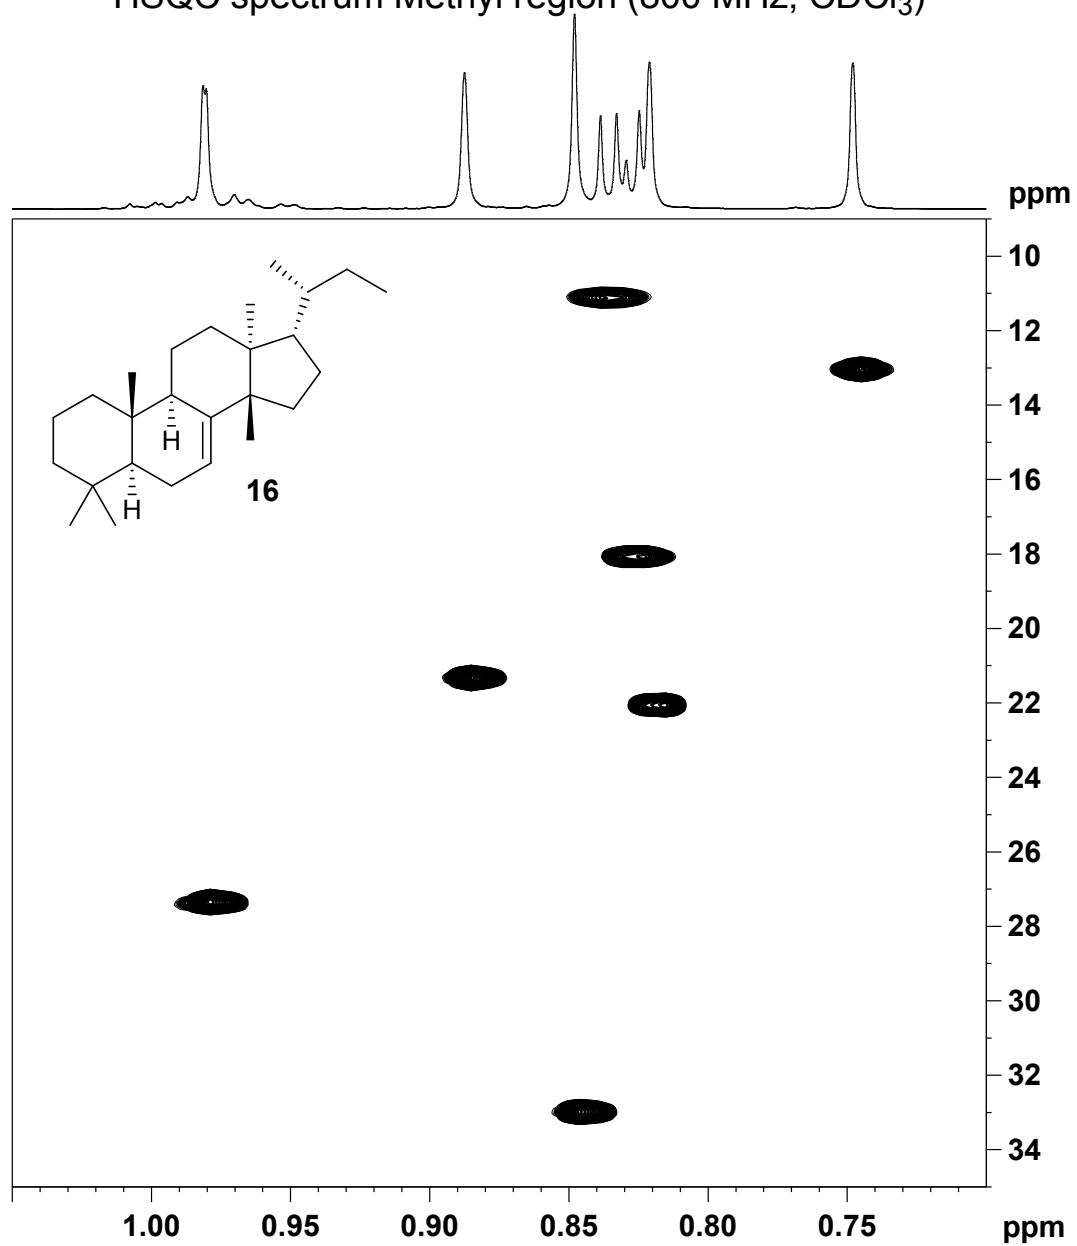

$^1\text{H-NMR}$  spectrum (600 MHz,  $\text{CDCl}_3$ )

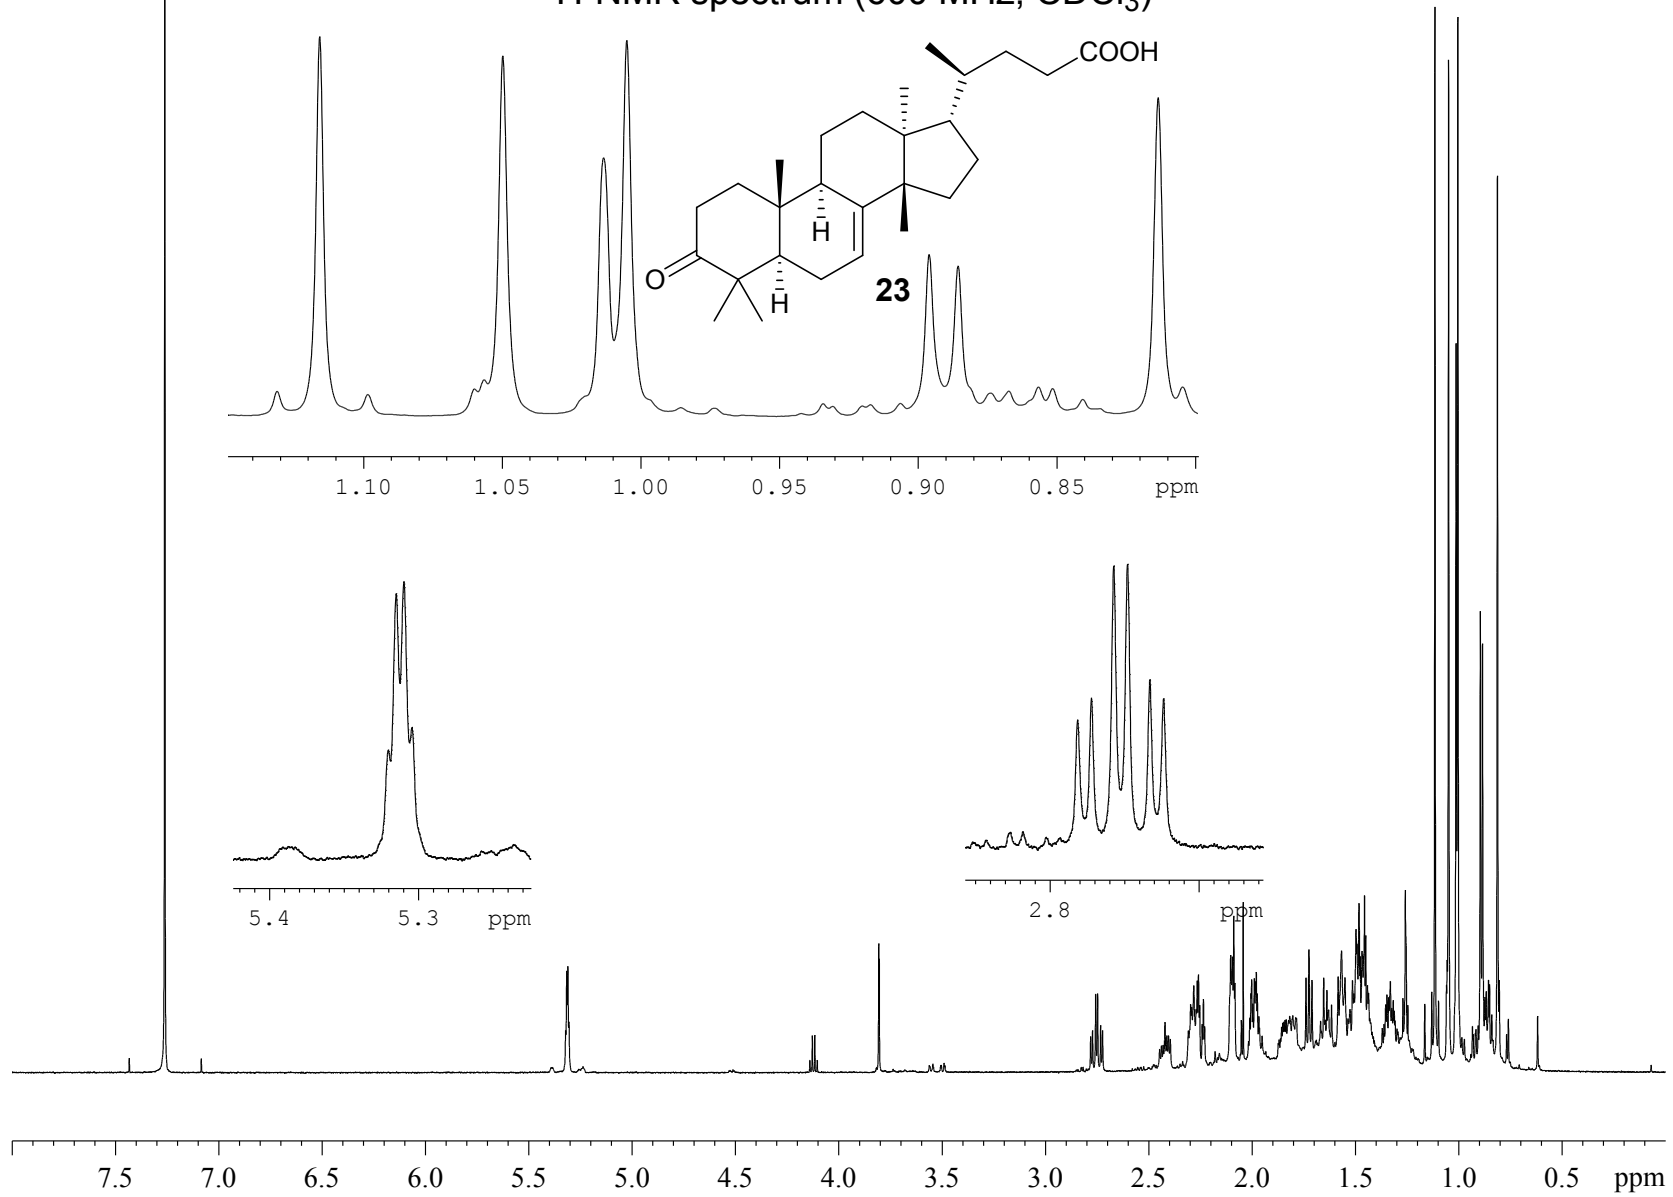

$^1\text{H-NMR}$  spectrum (600 MHz,  $\text{CDCl}_3$ )

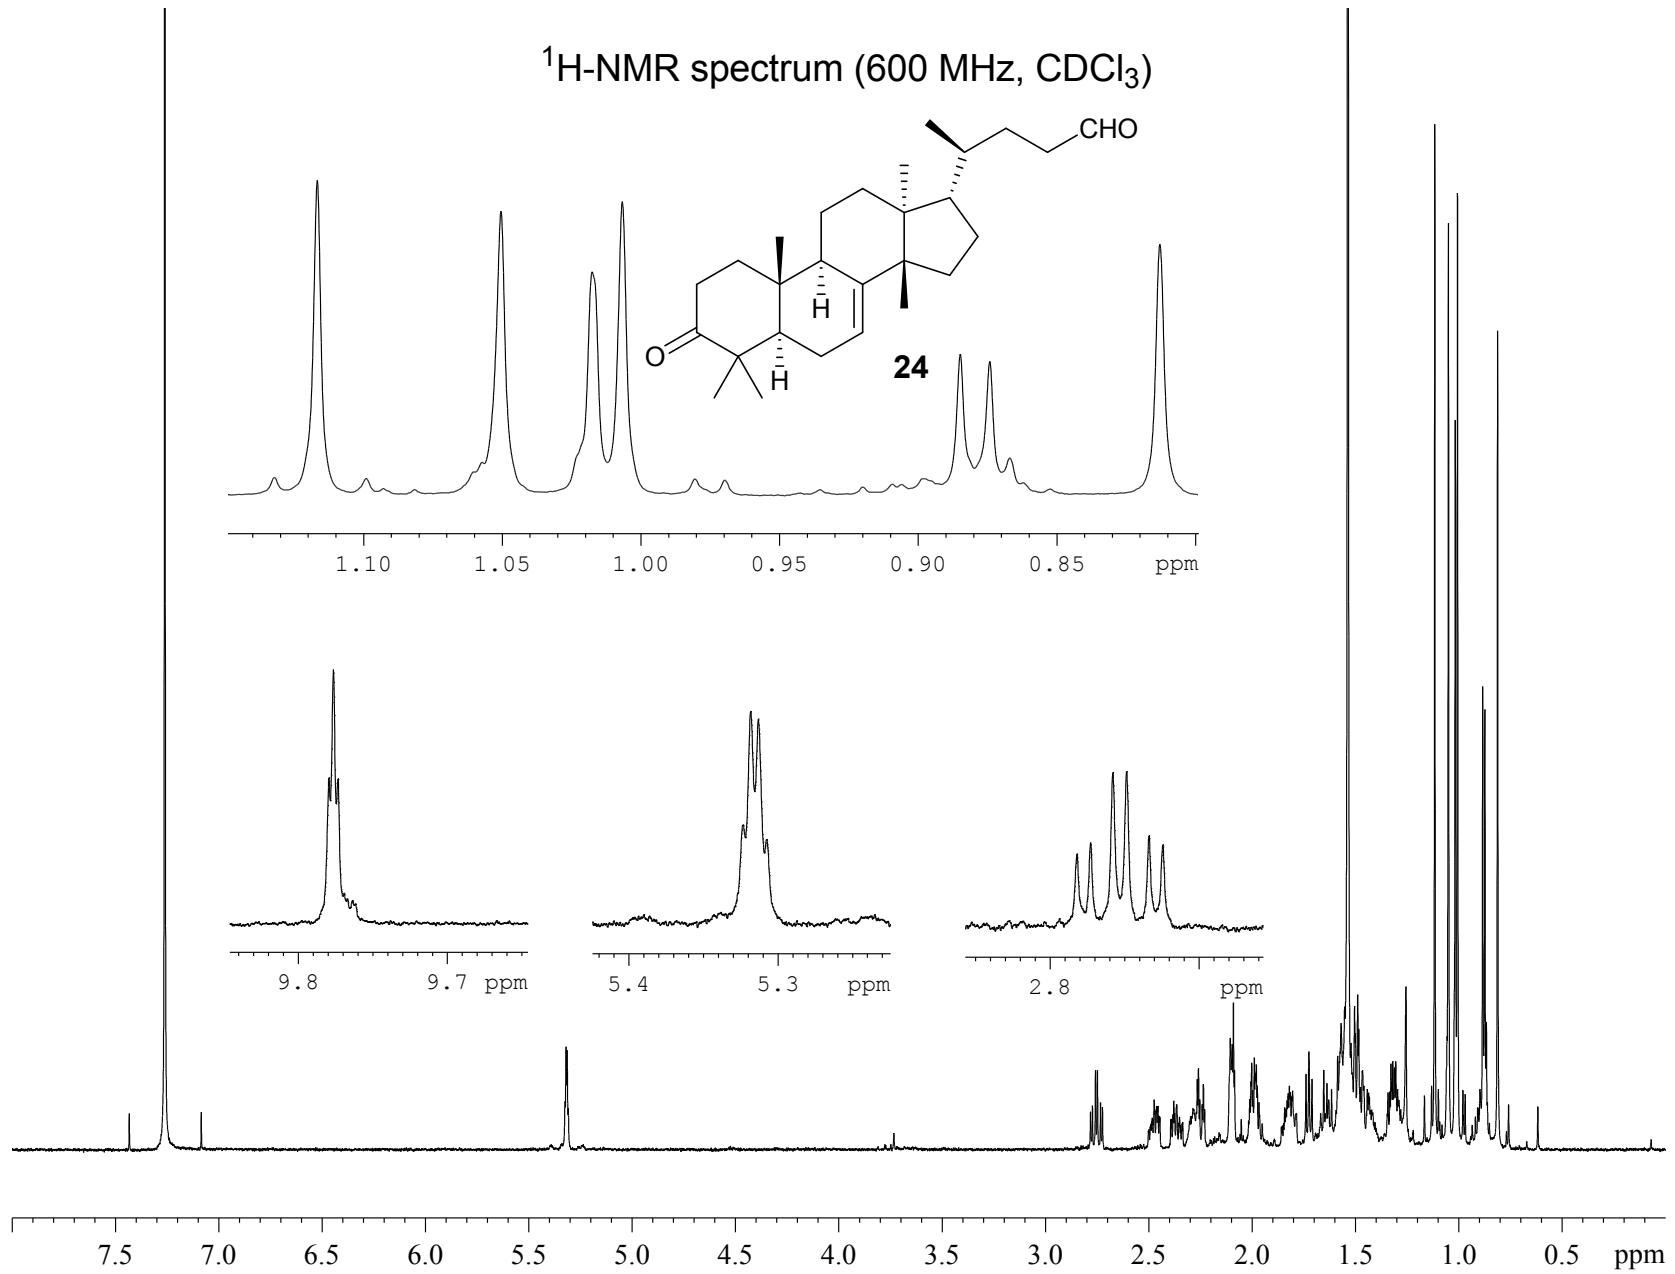

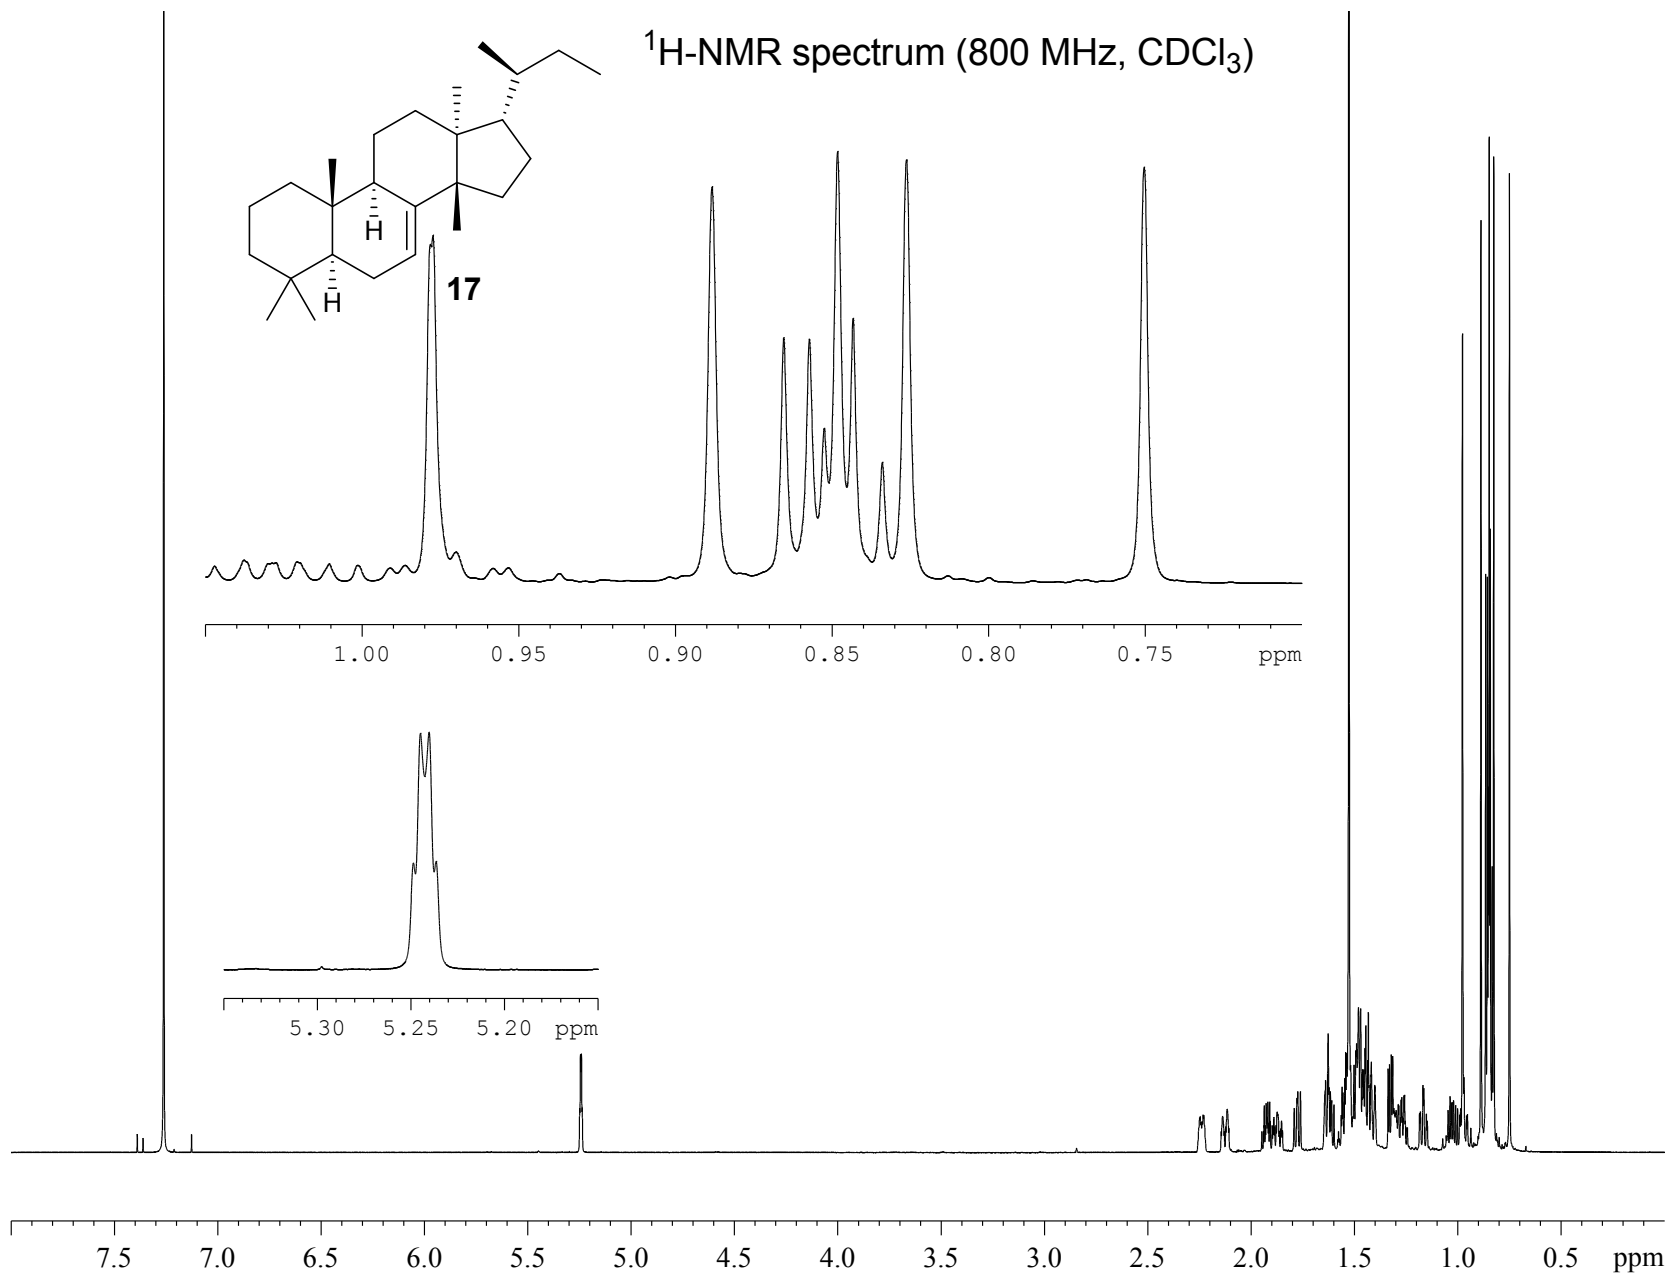

HSQC spectrum Methyl region (800 MHz, CDCl<sub>3</sub>)

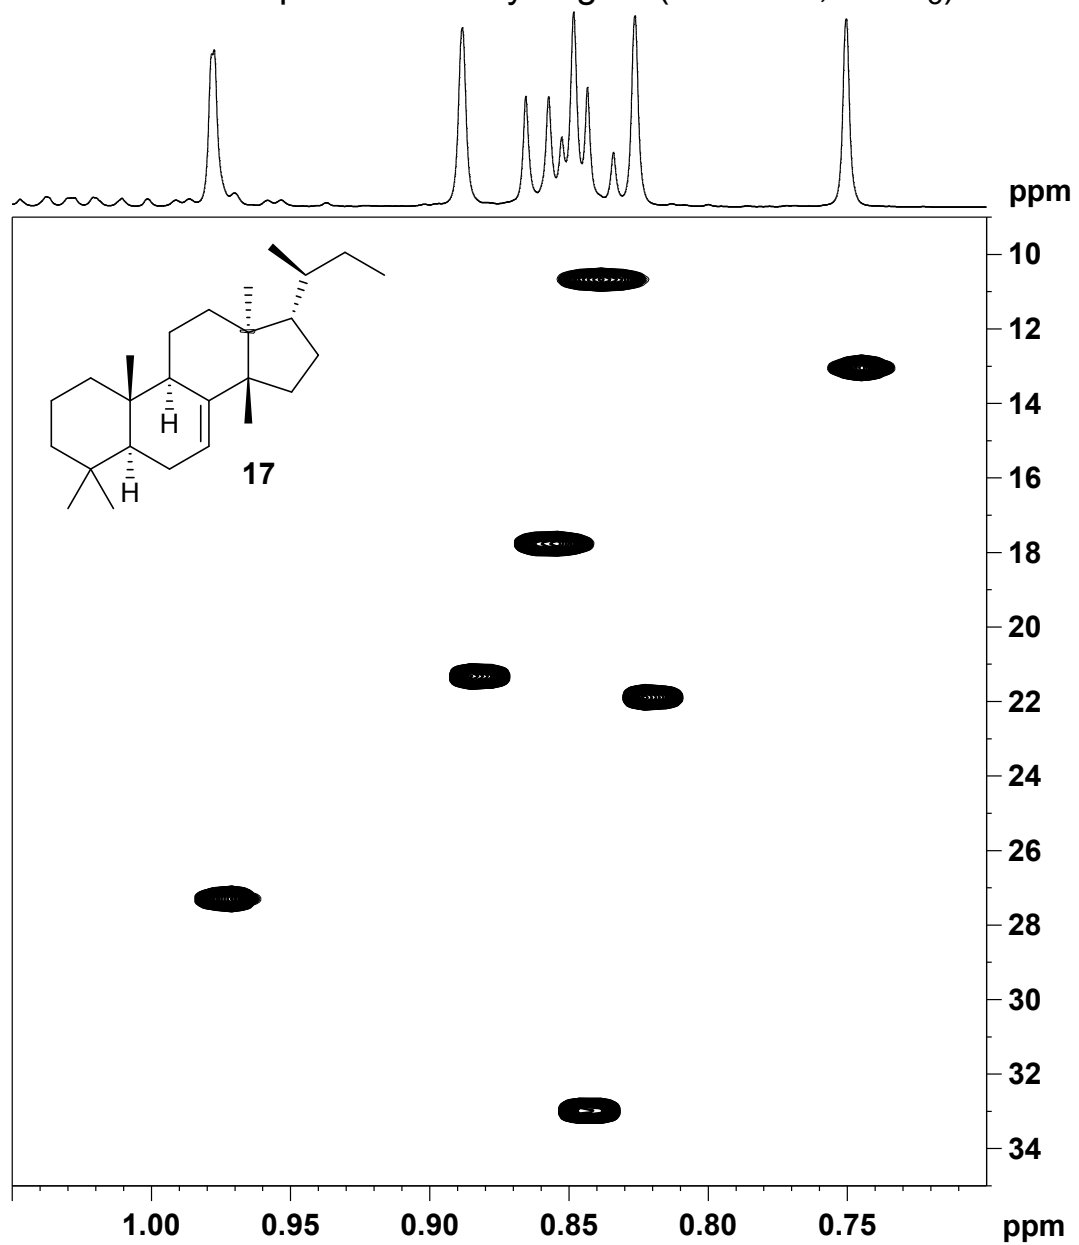

$^1\text{H-NMR}$  spectrum (600 MHz,  $\text{CDCl}_3$ )

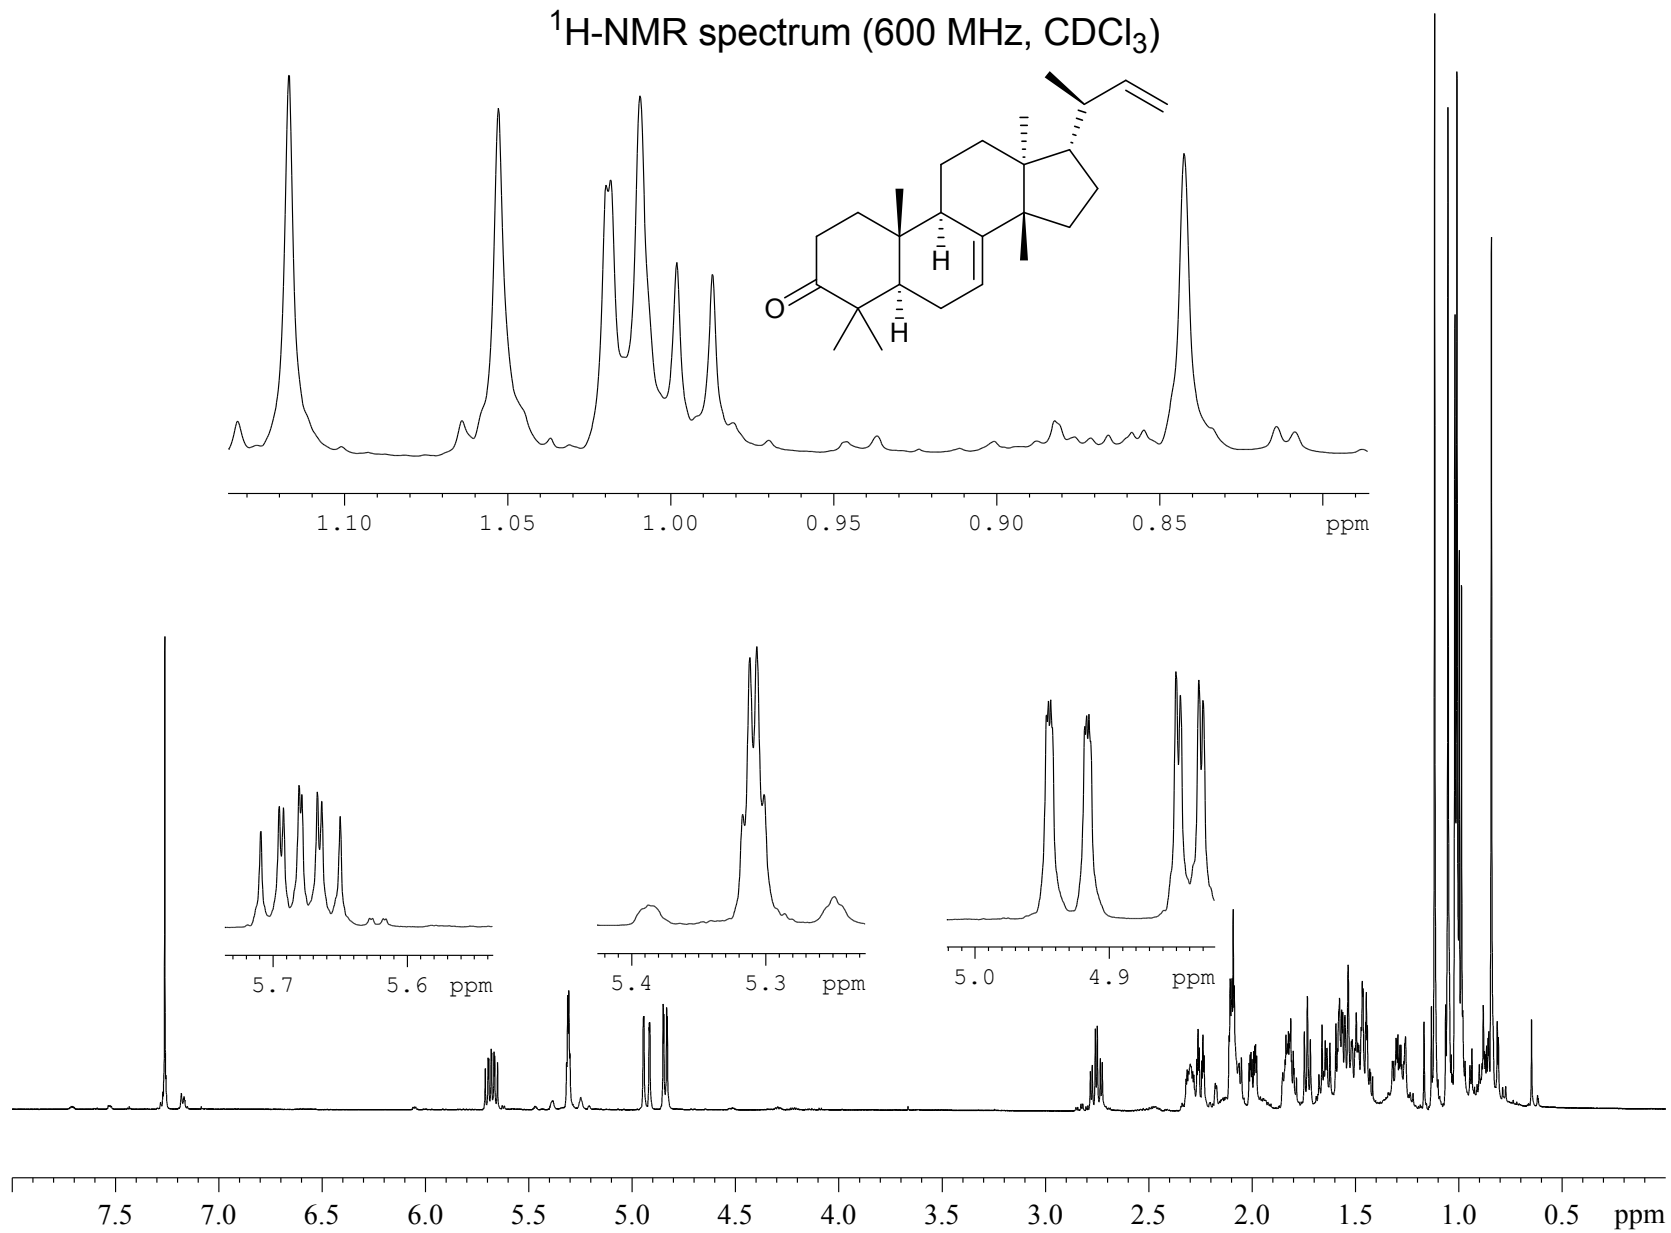

$^1\text{H-NMR}$  spectrum (600 MHz,  $\text{CDCl}_3$ )

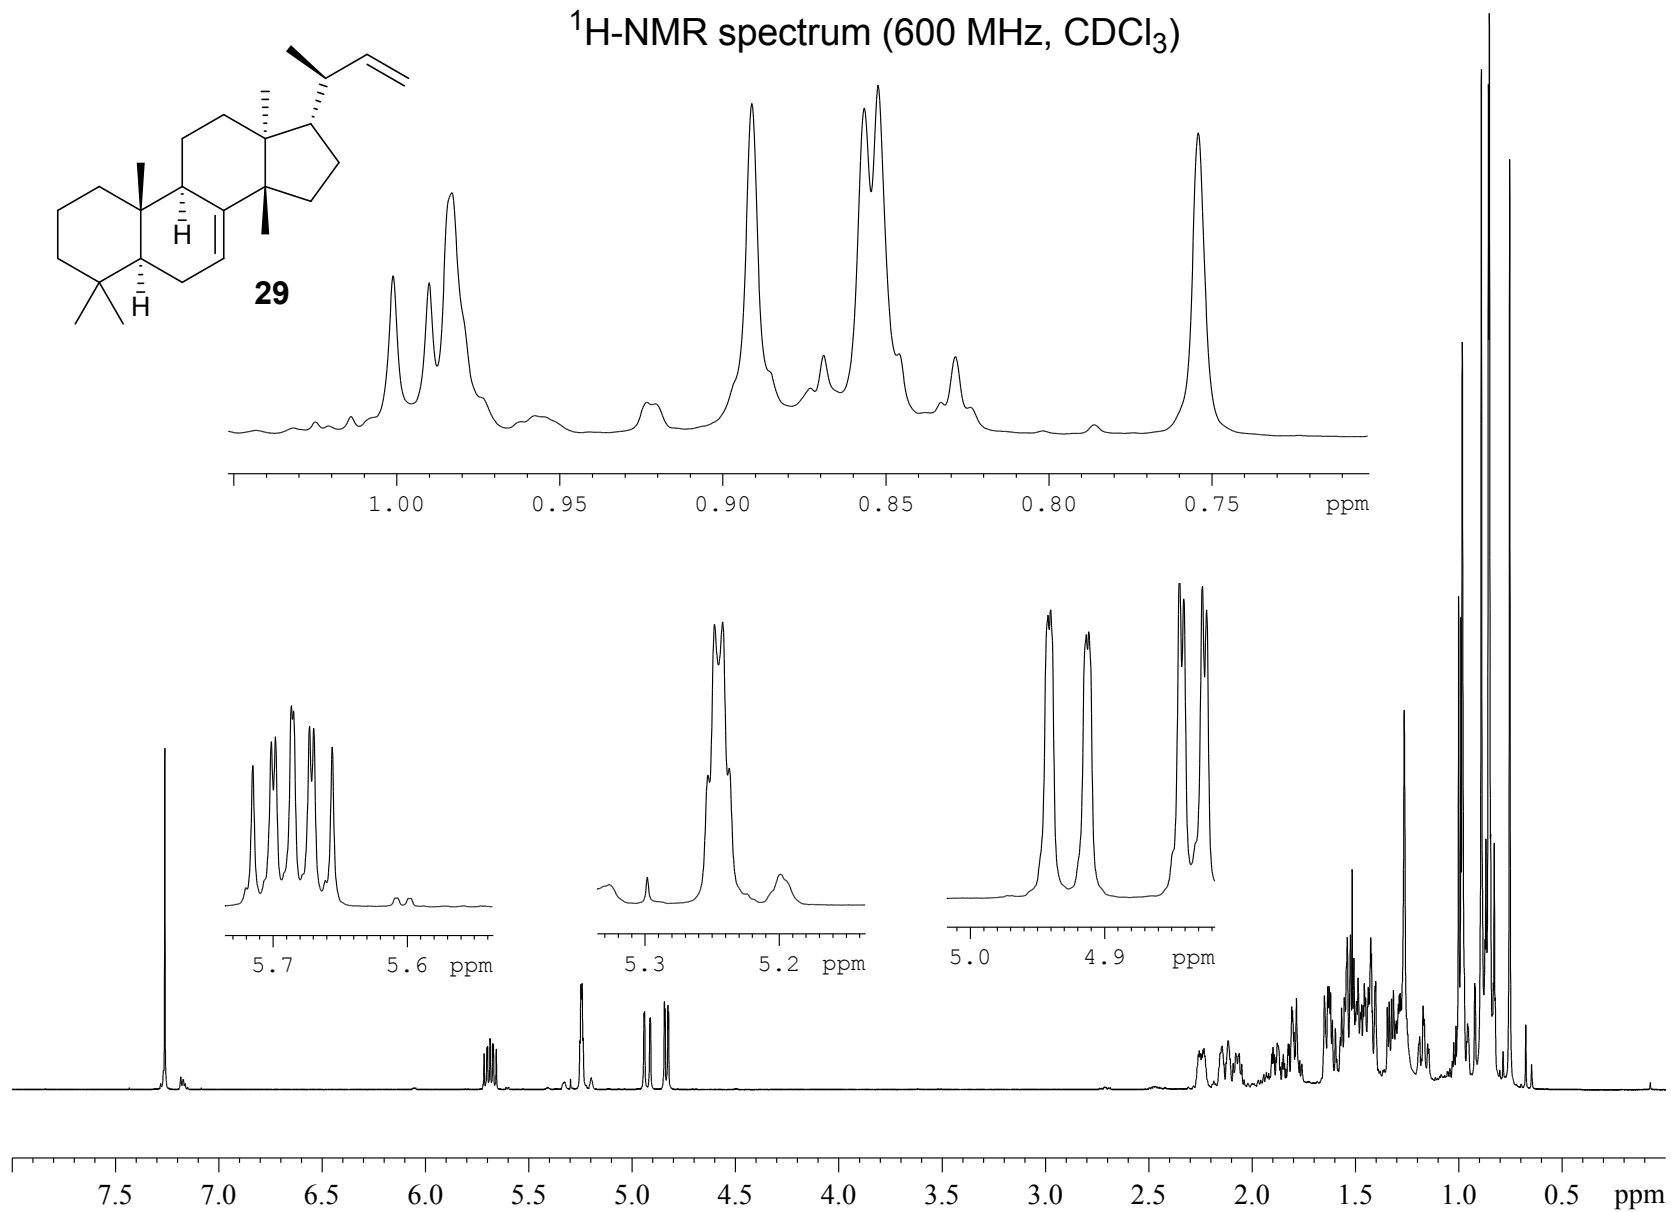

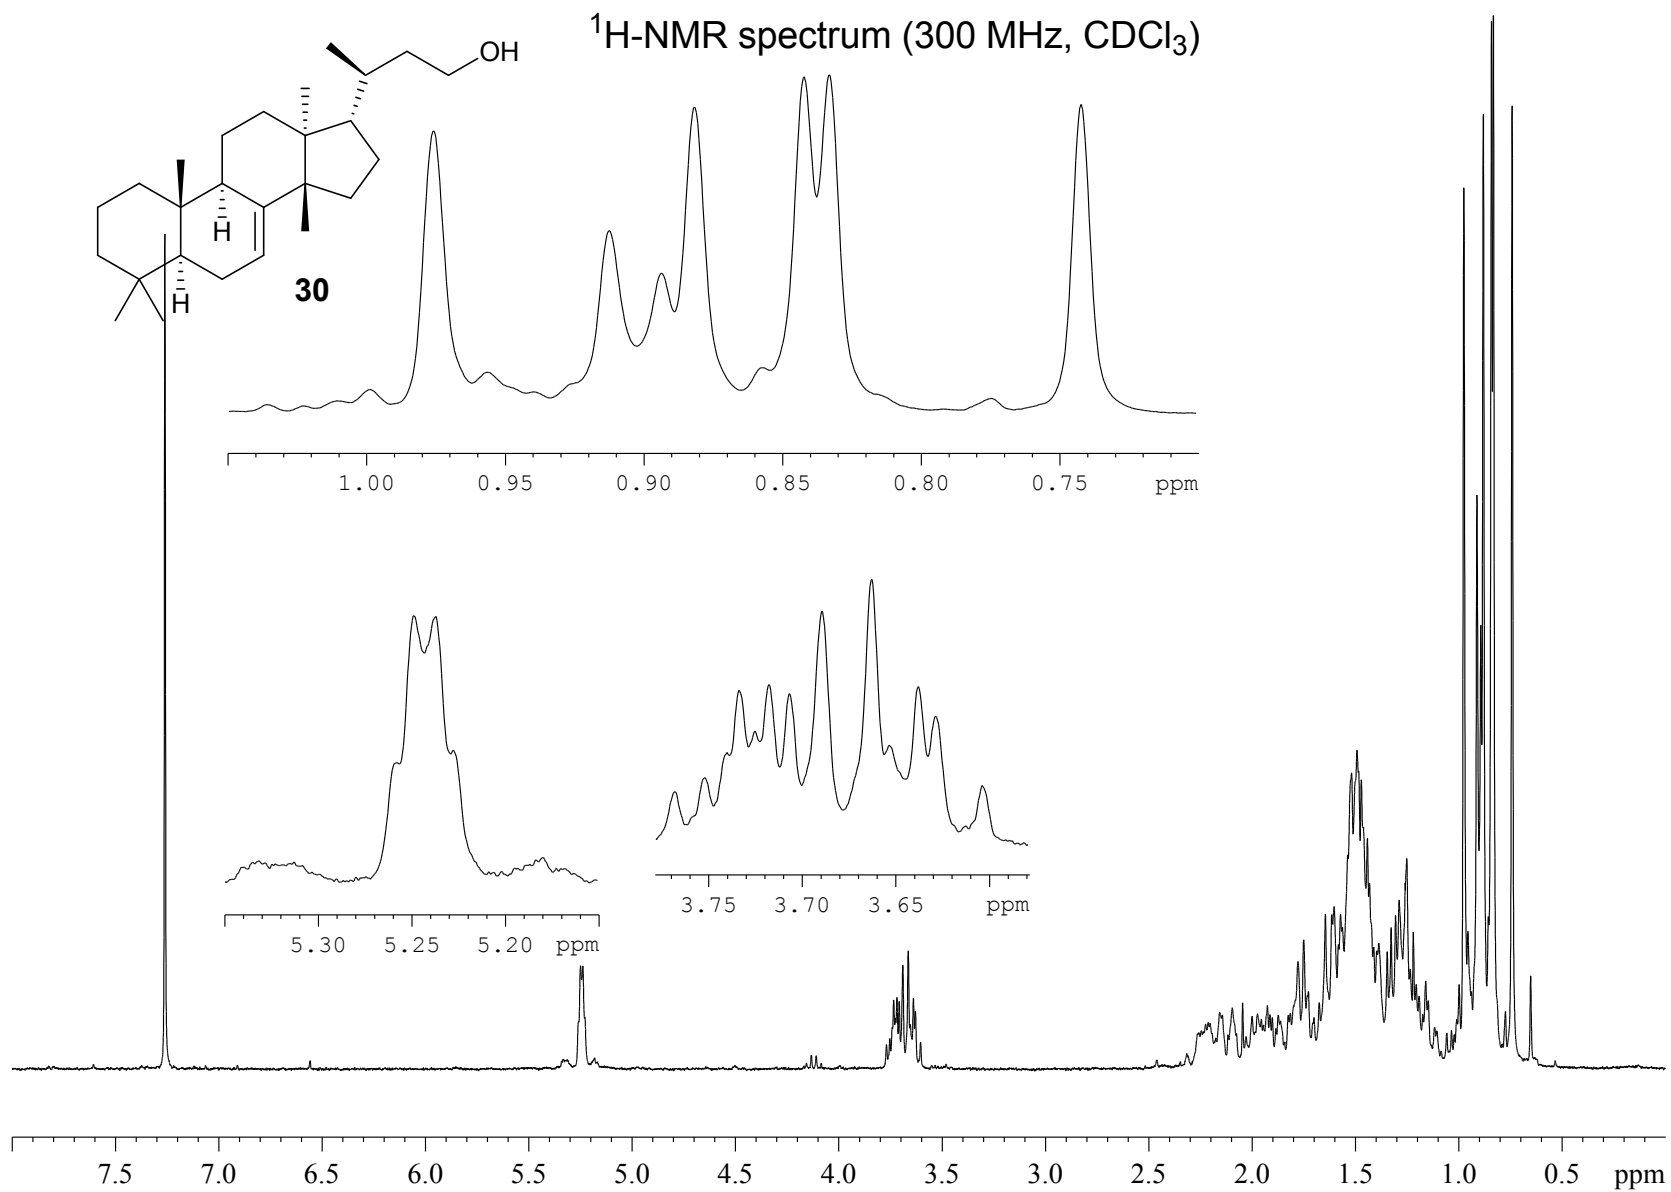



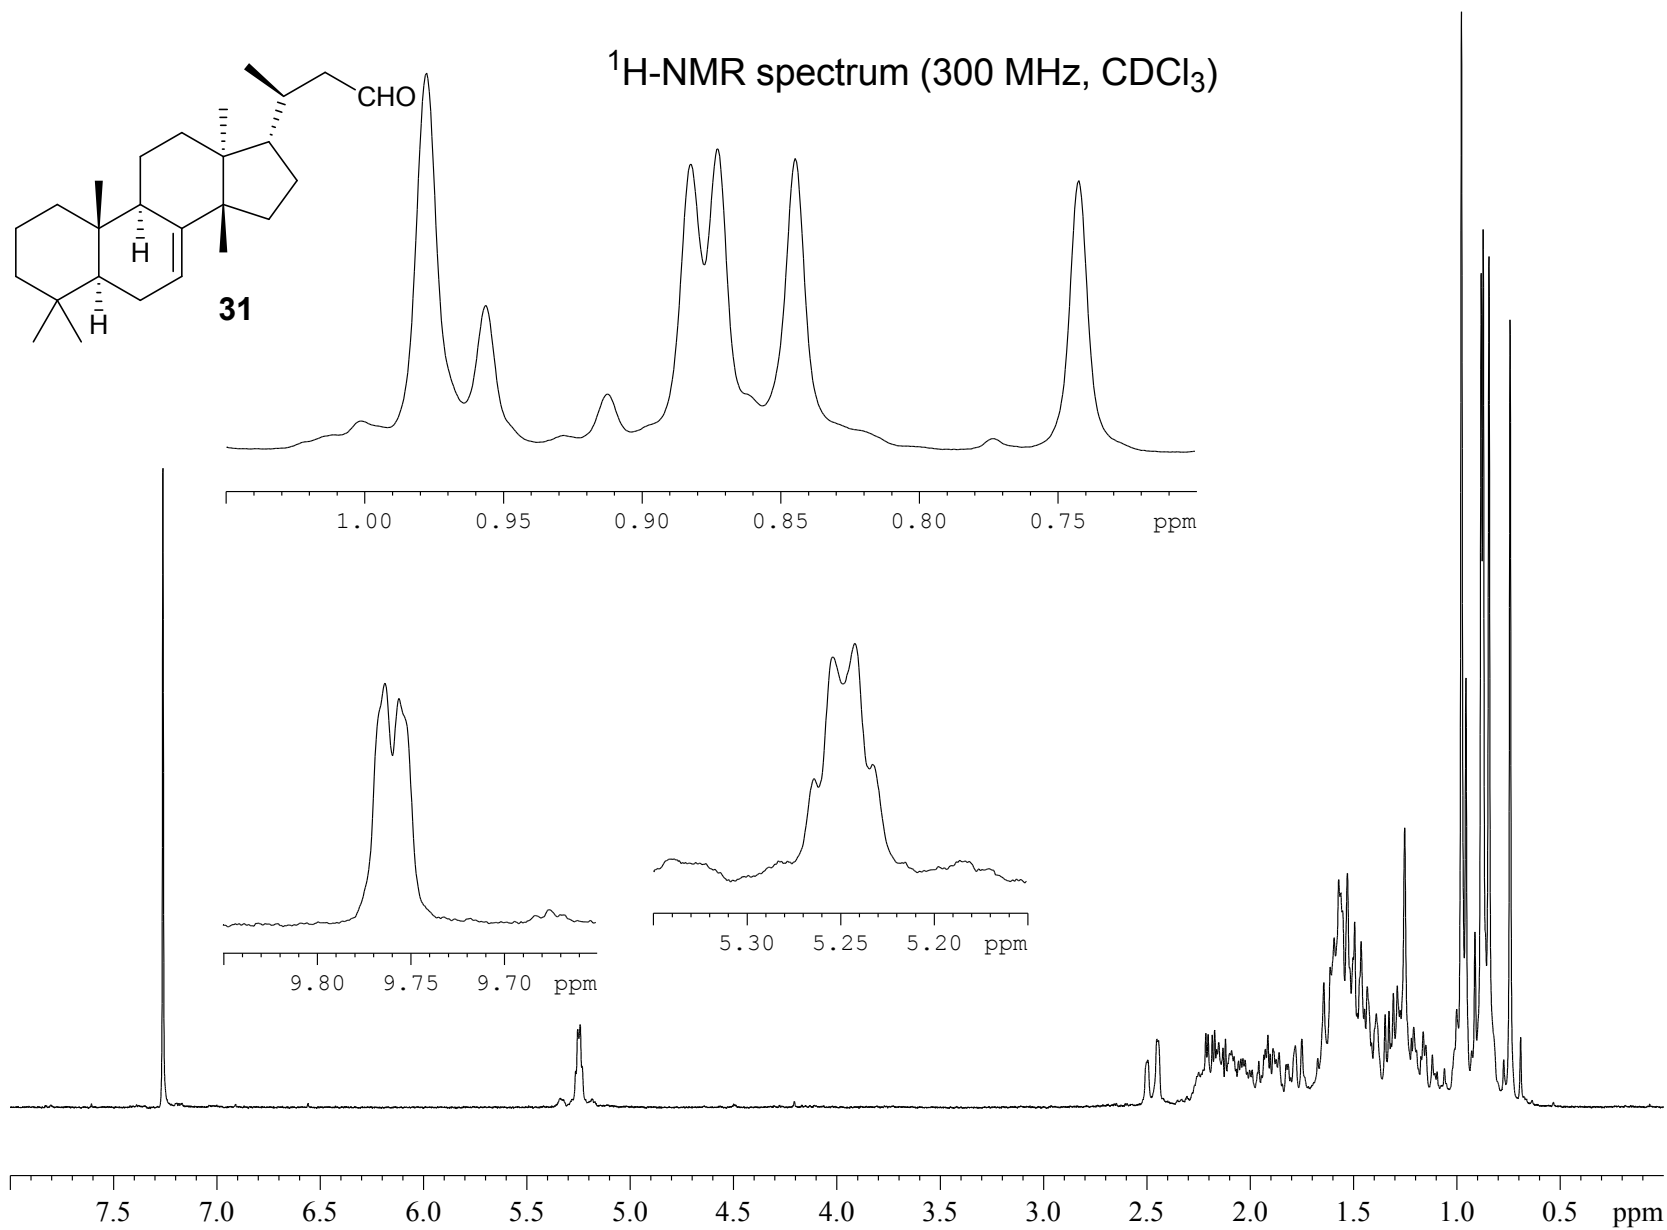

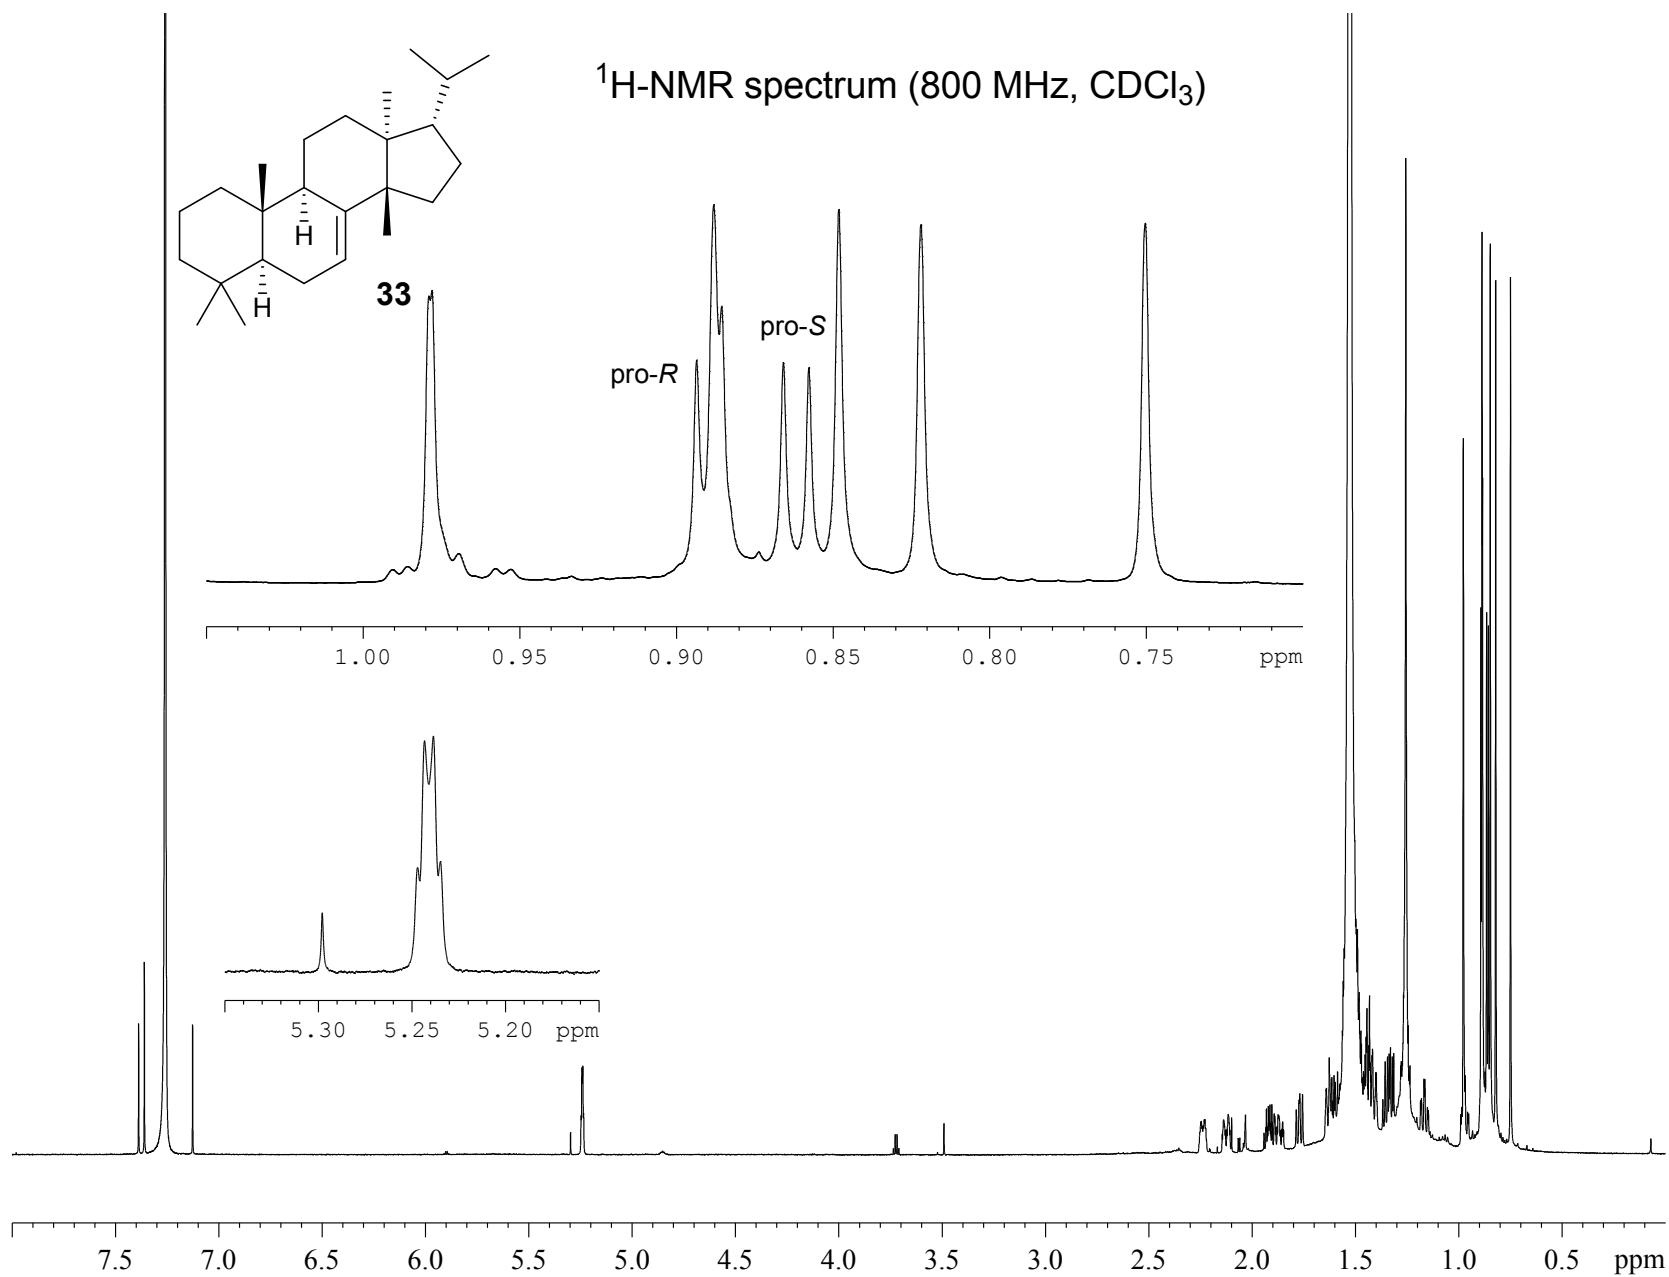

HSQC NMR spectrum Methyl region (800 MHz, CDCl<sub>3</sub>)

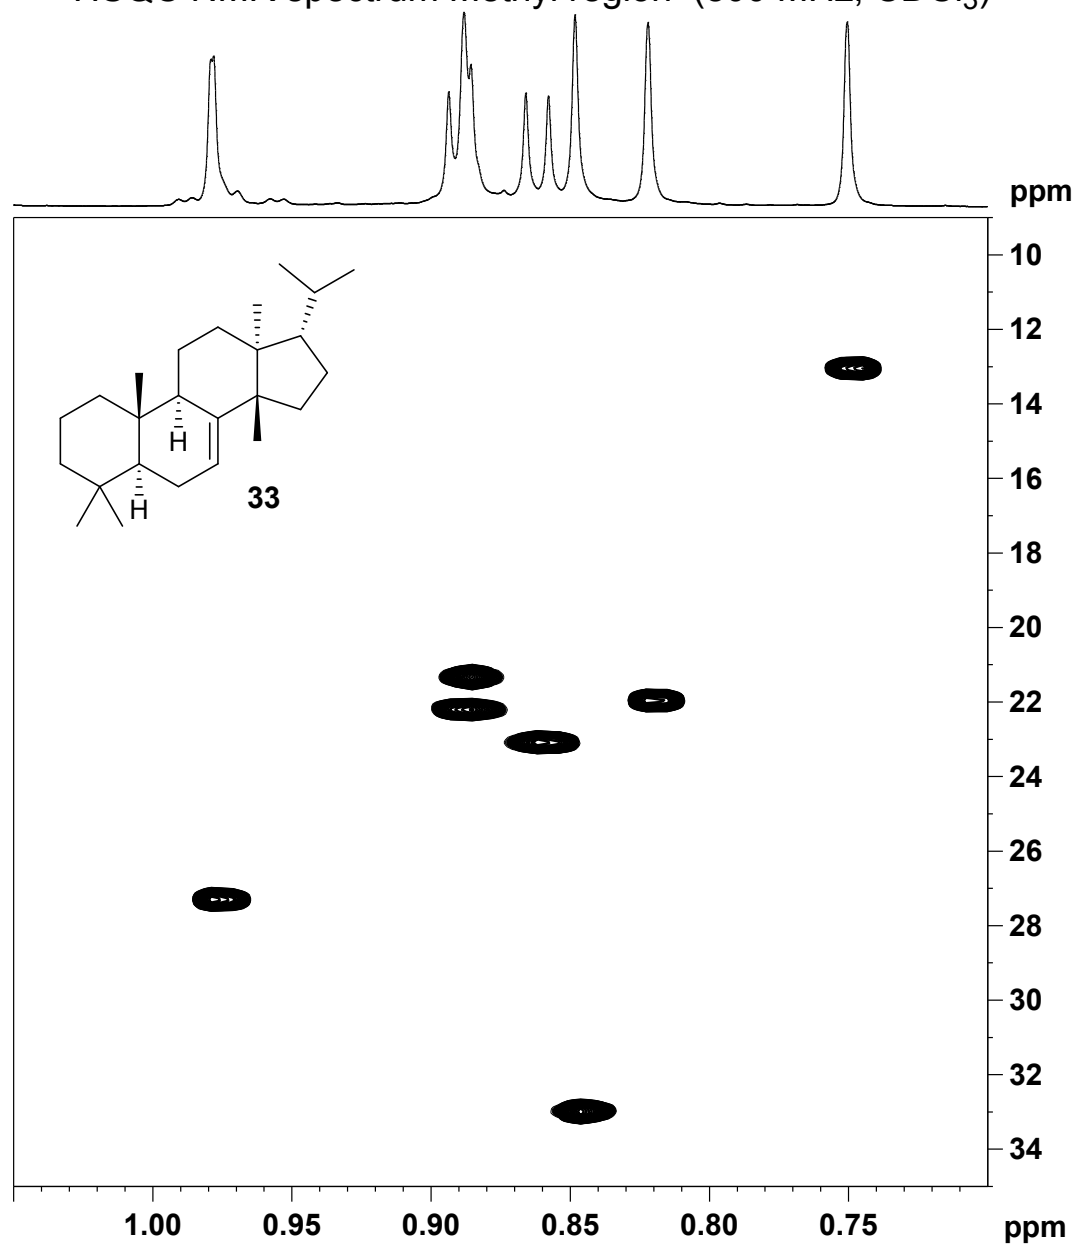

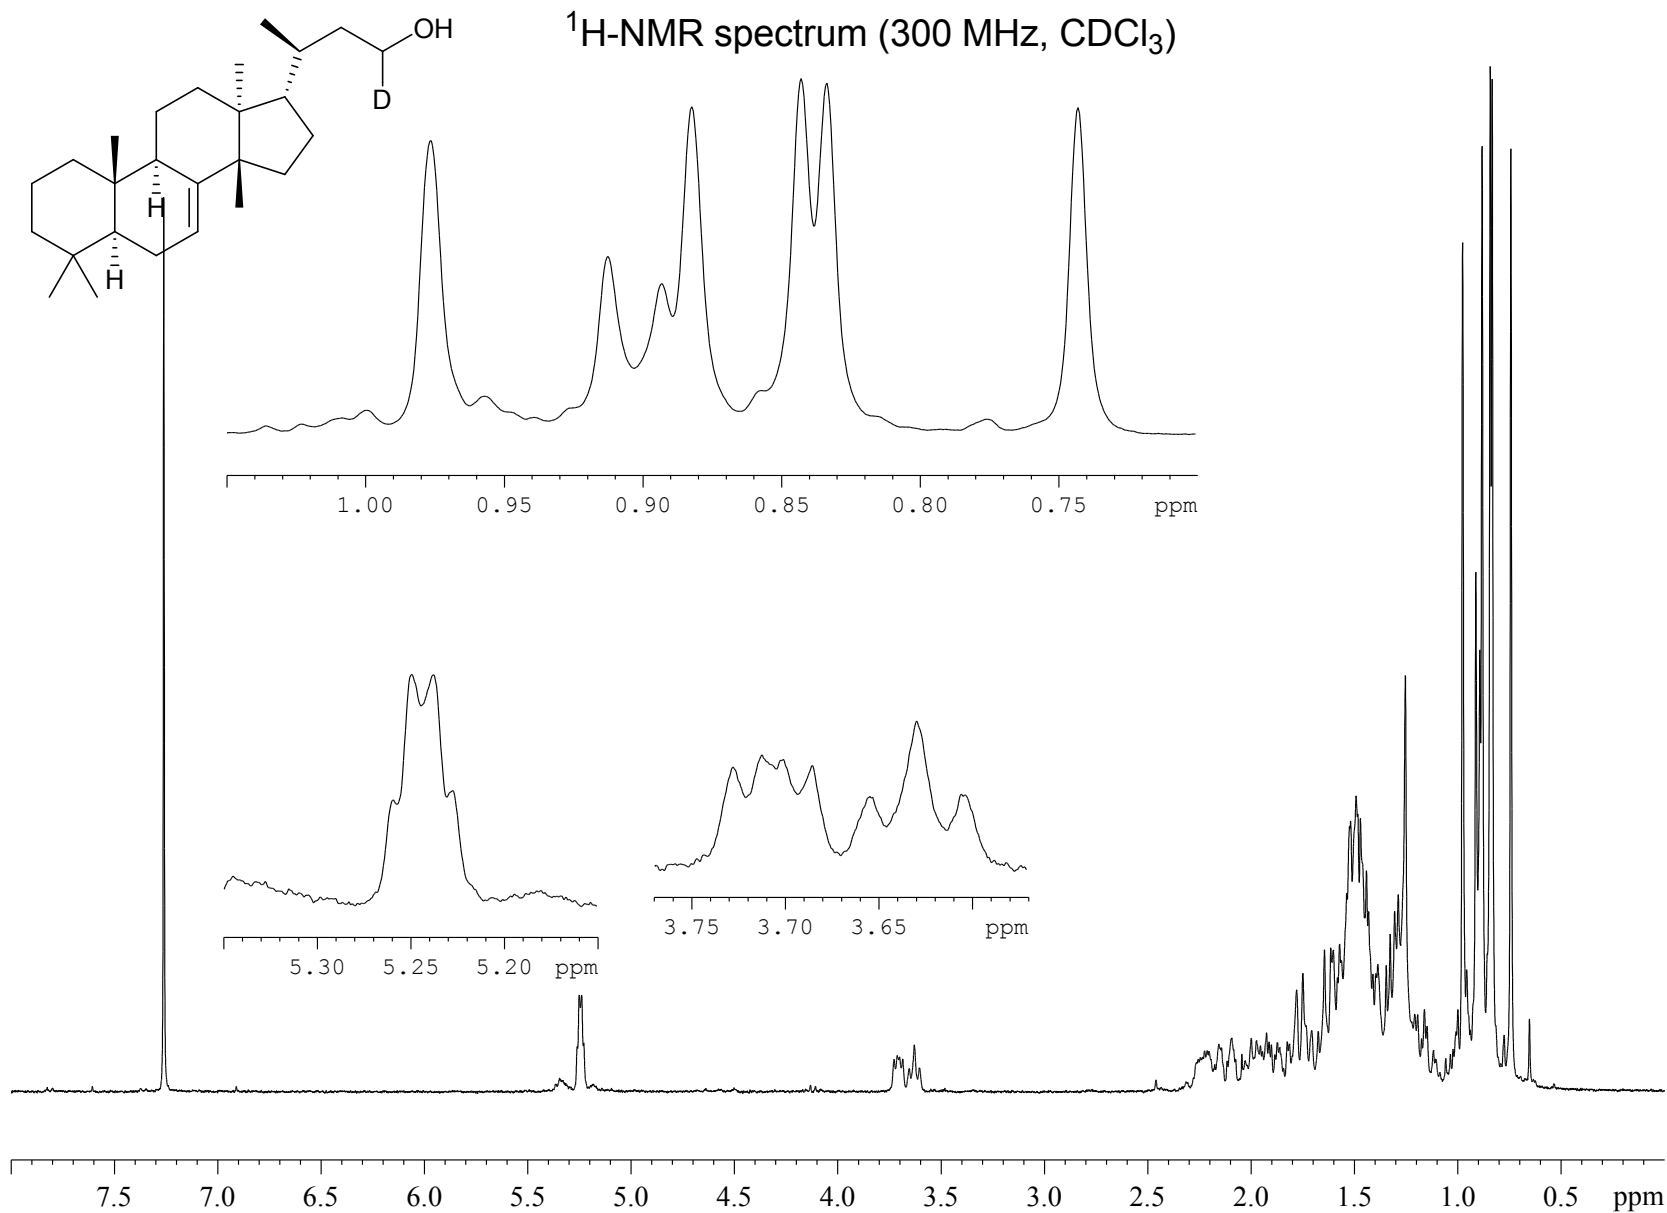

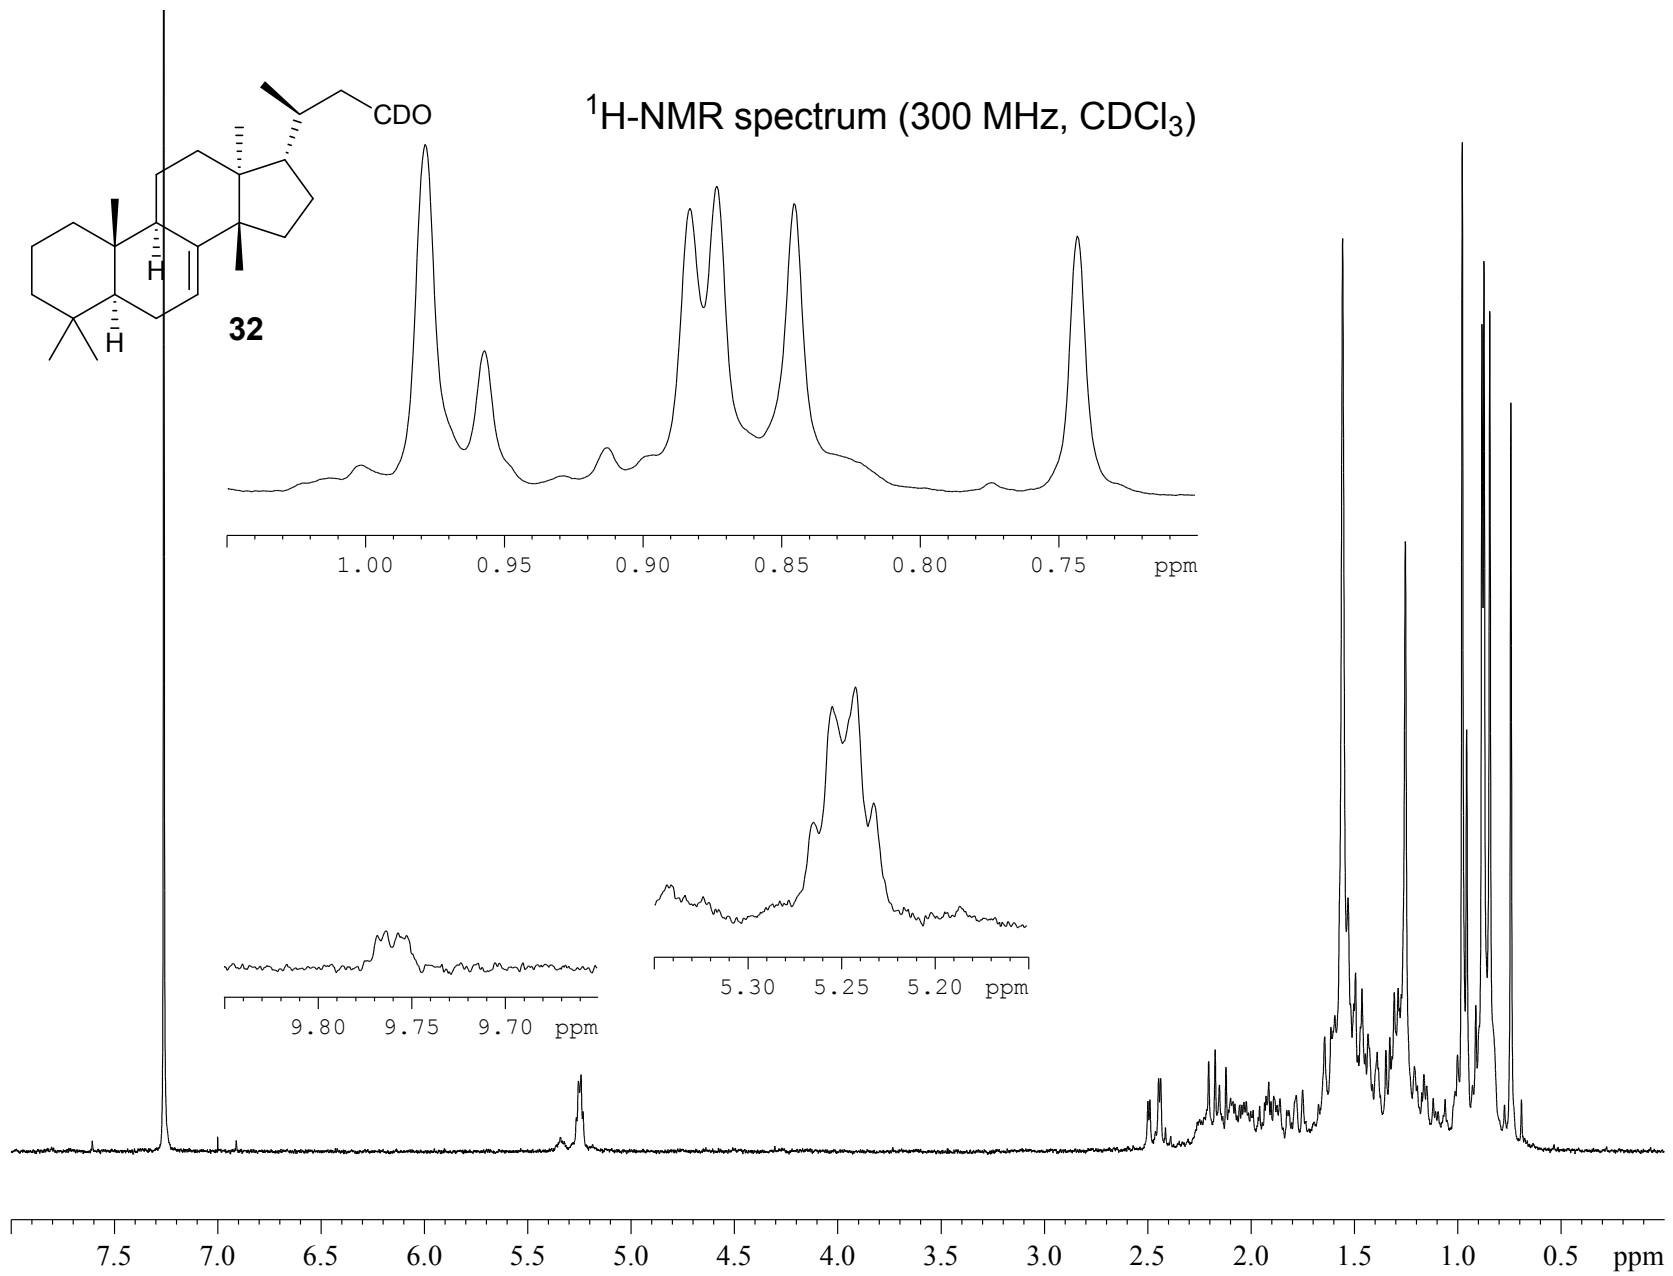

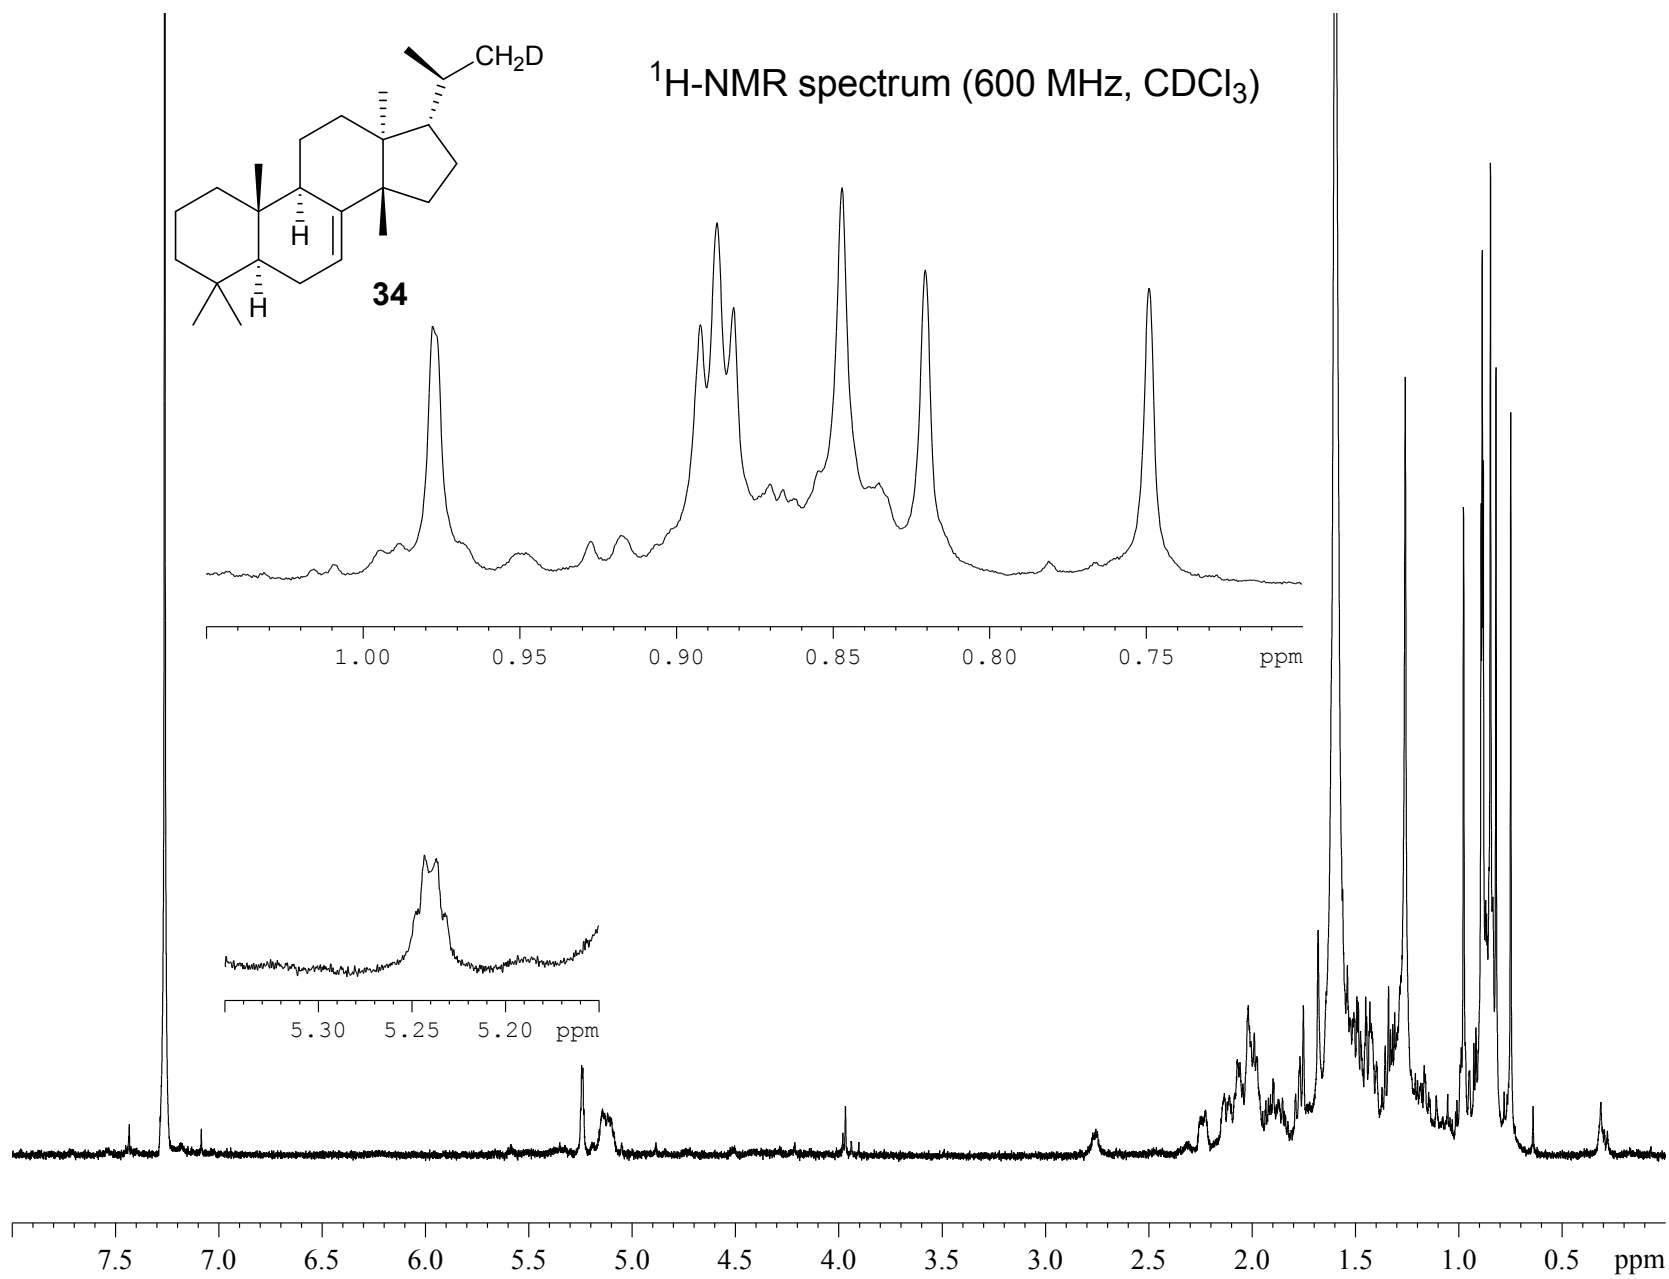

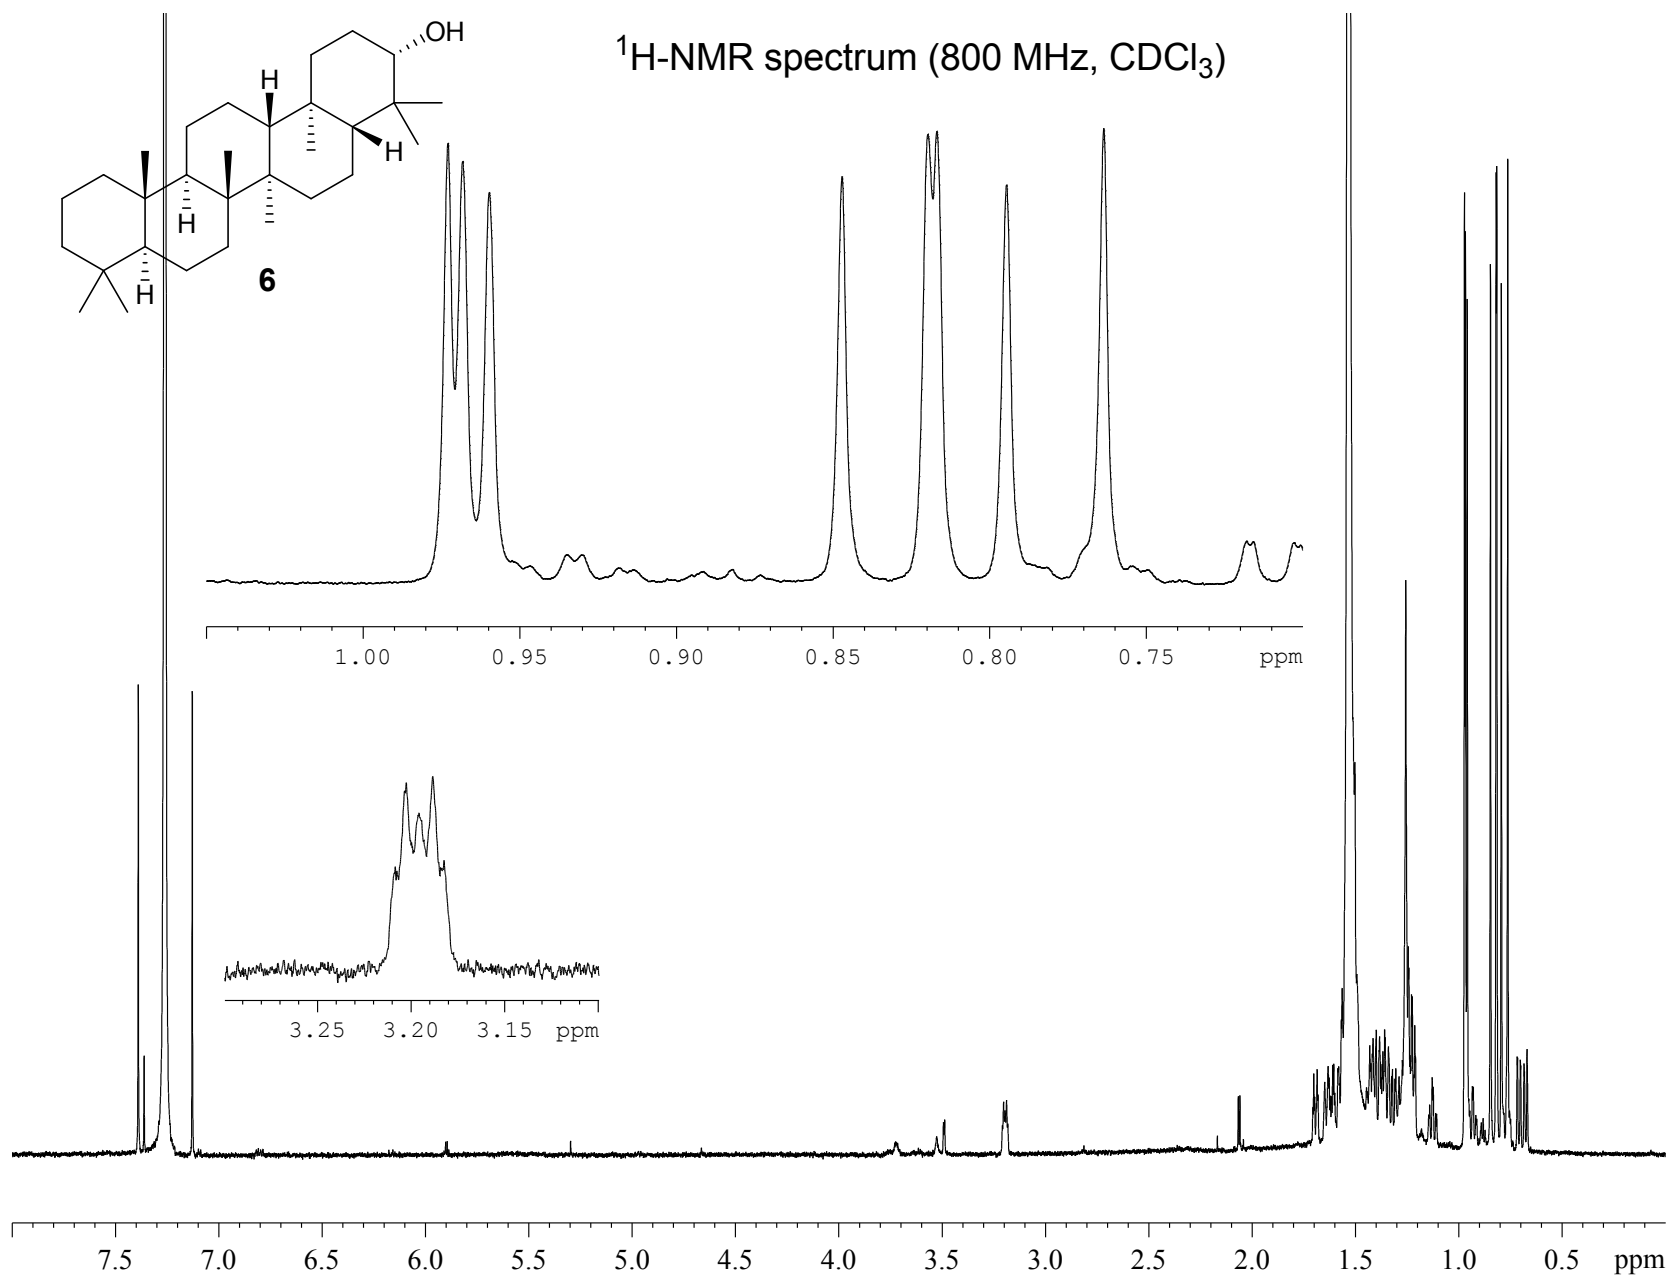

$^1\text{H-NMR}$  spectrum (800 MHz,  $\text{CDCl}_3$ )

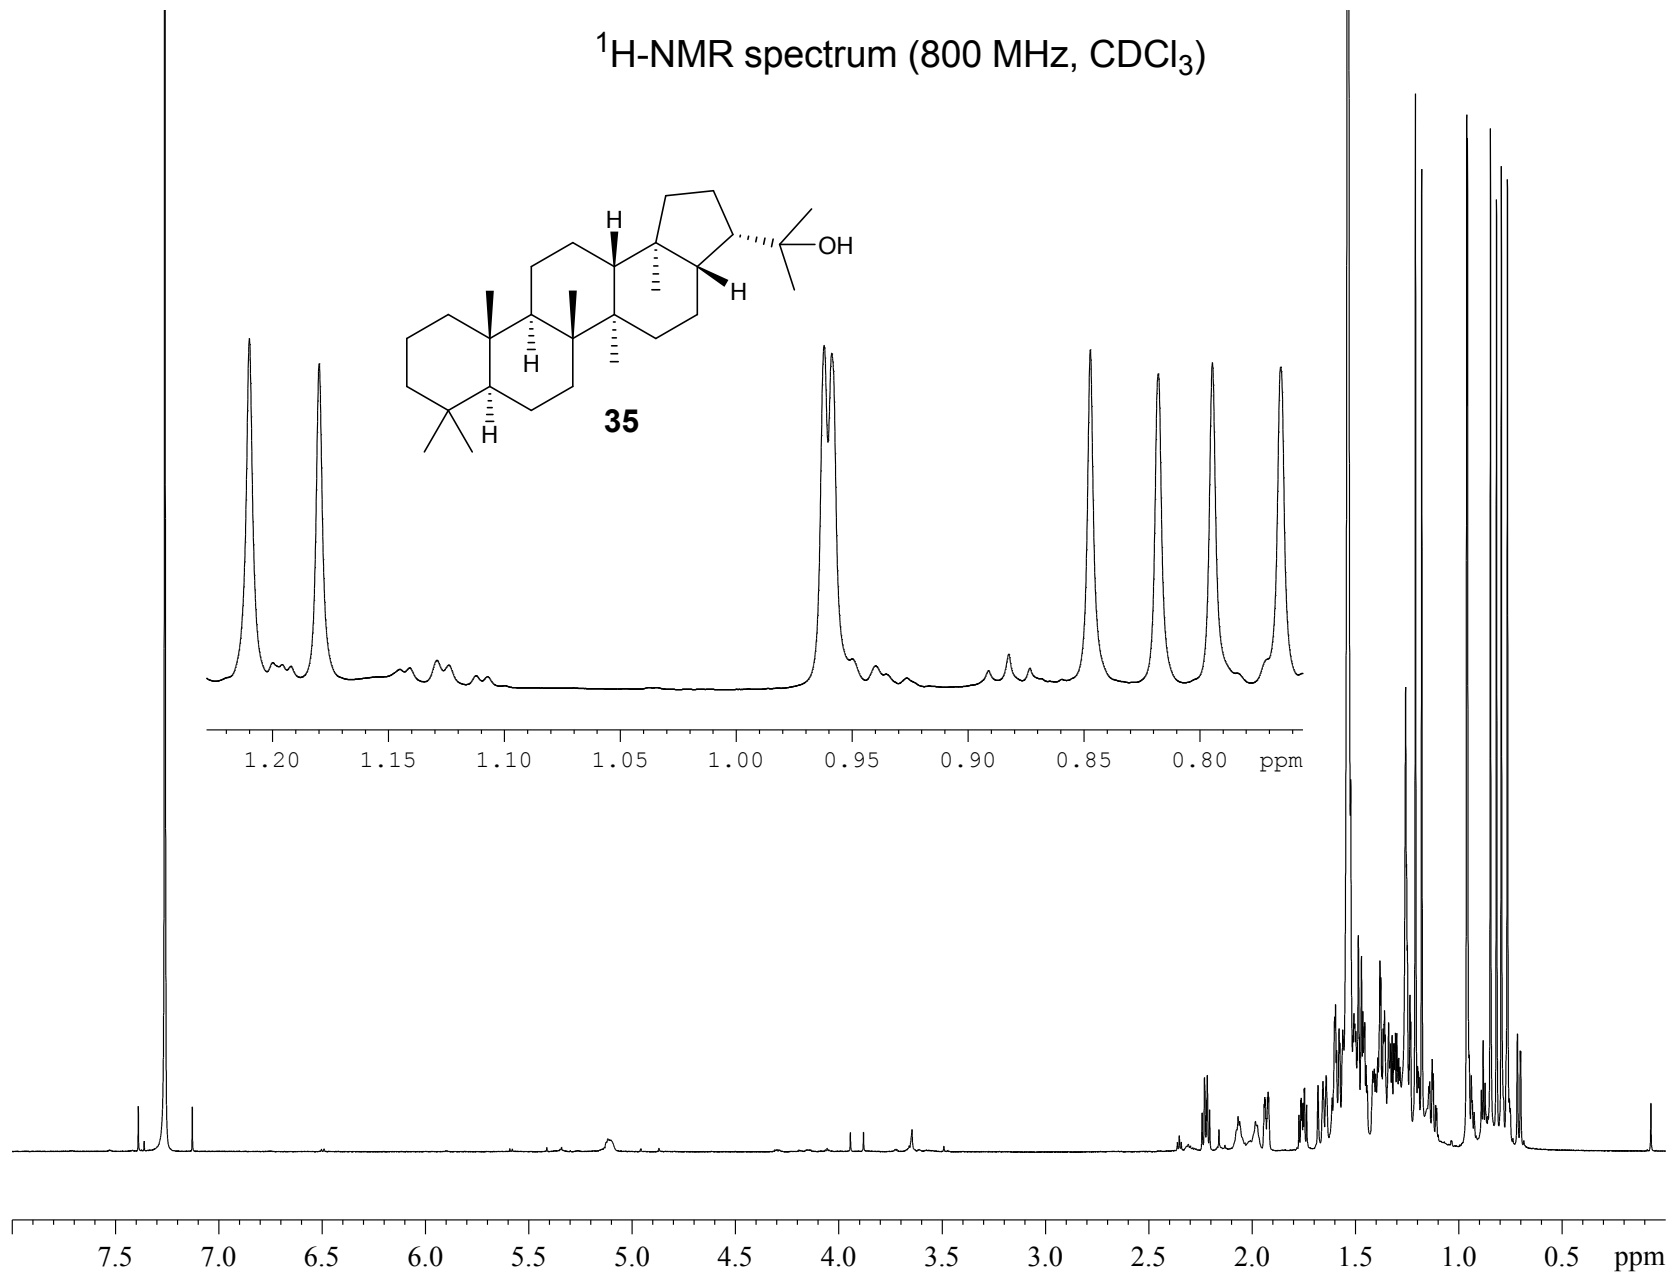



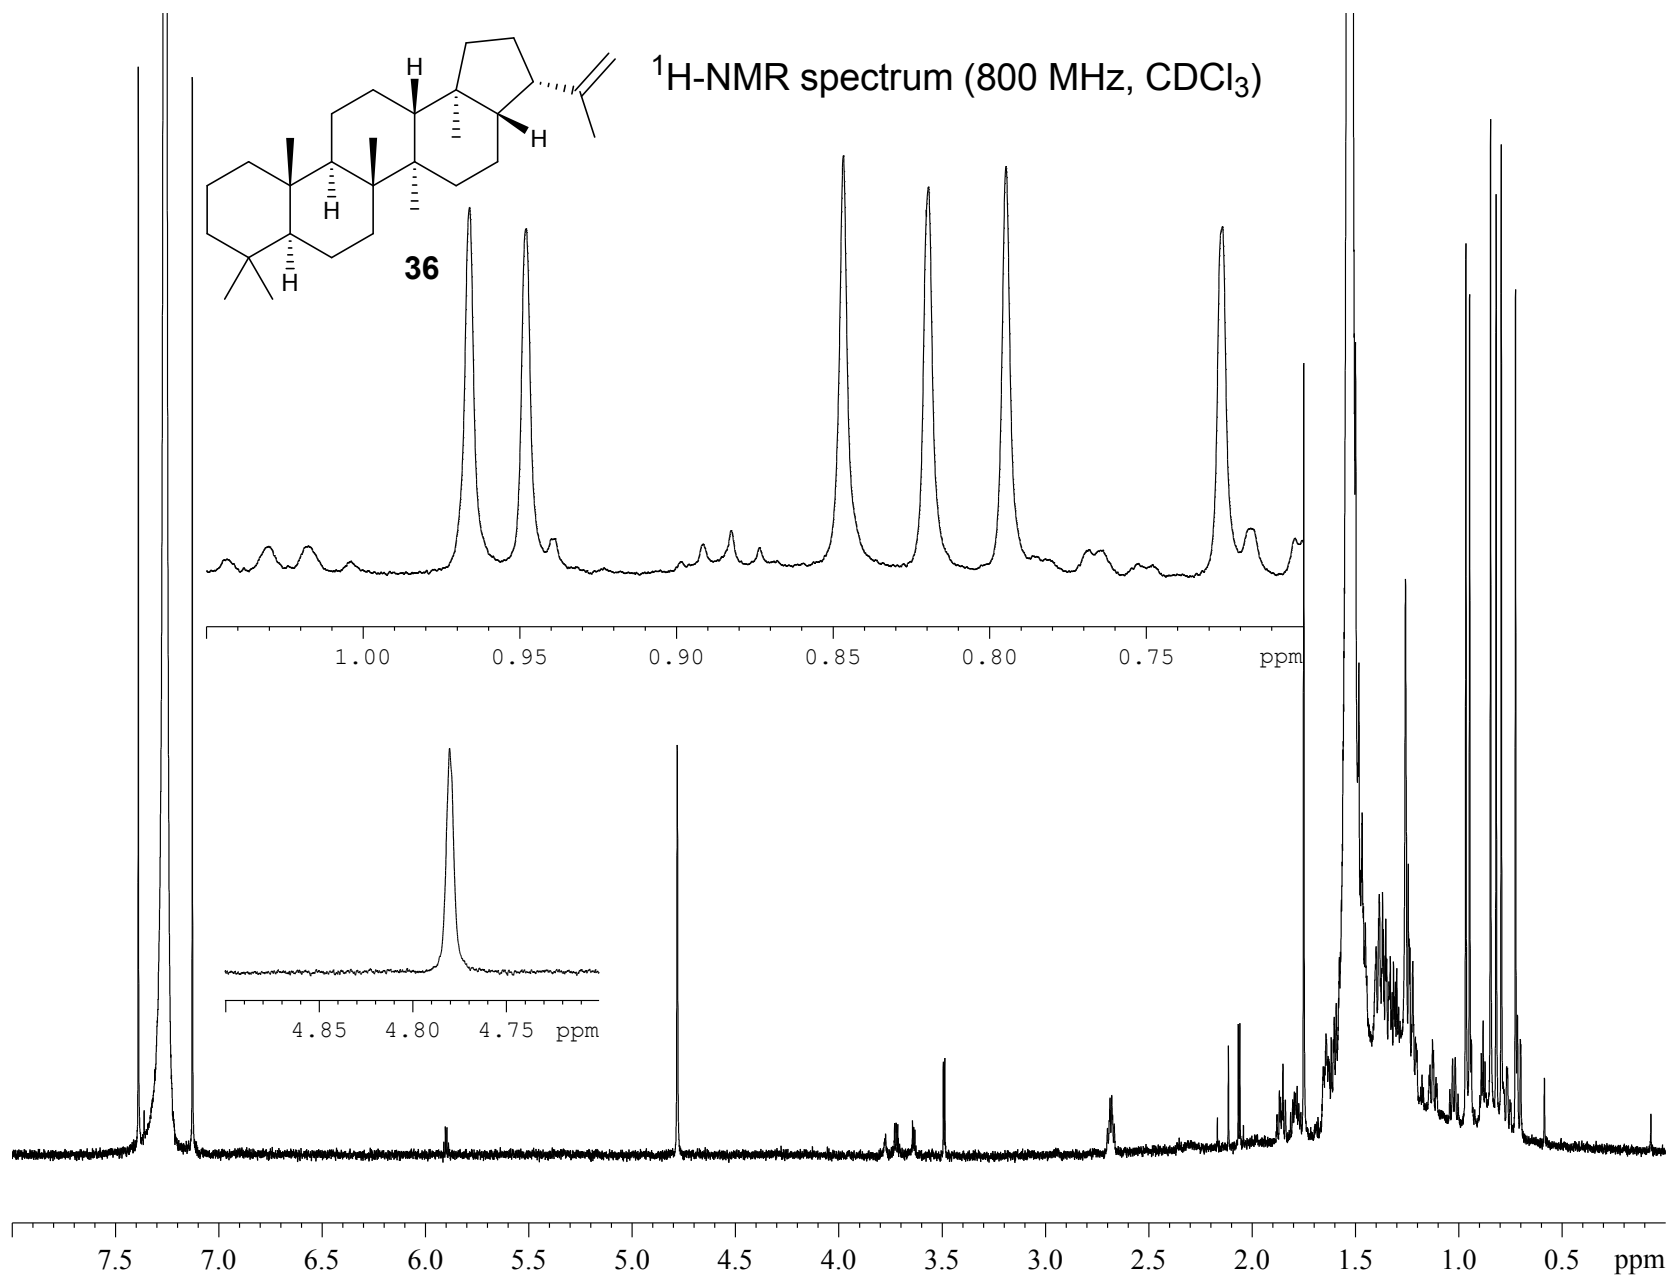

$^1\text{H-NMR}$  spectrum (800 MHz,  $\text{CDCl}_3$ )

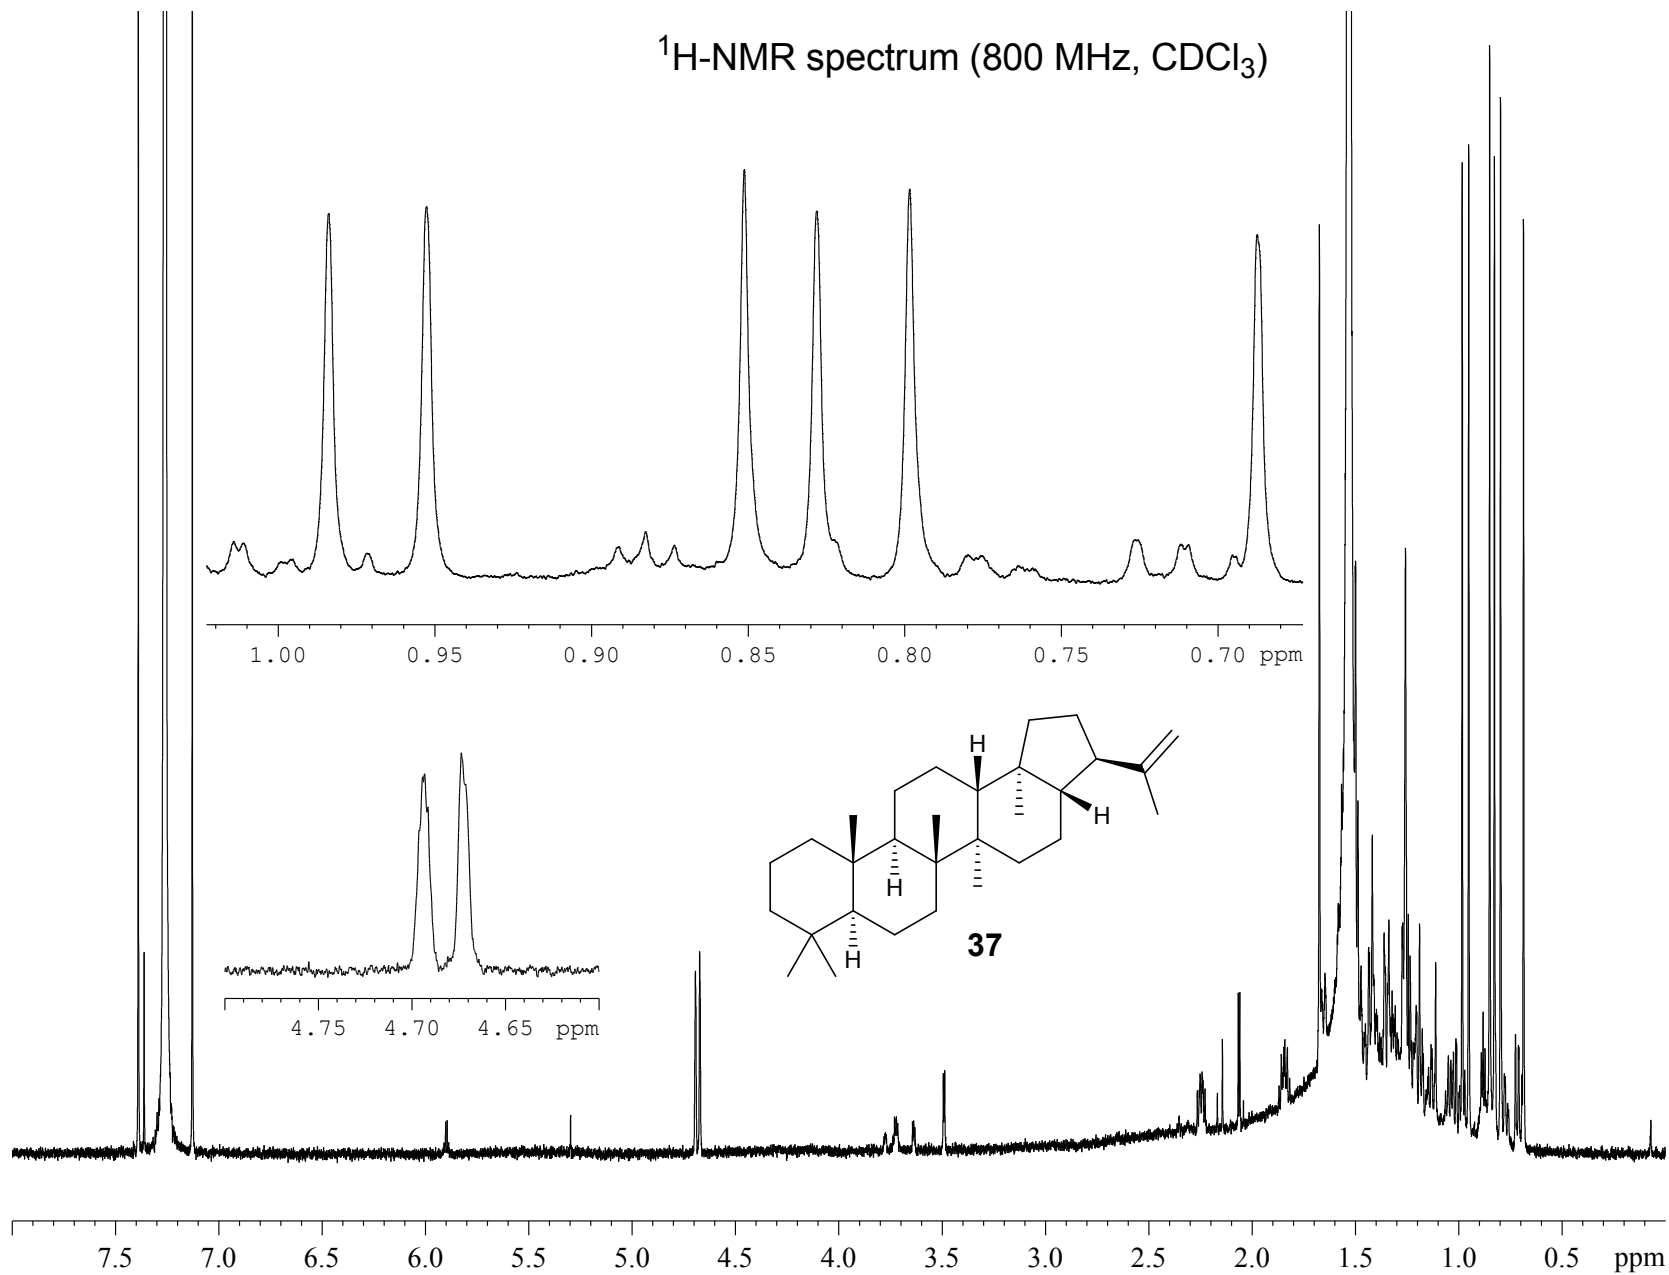

$^1\text{H-NMR}$  spectrum (800 MHz,  $\text{CDCl}_3$ )

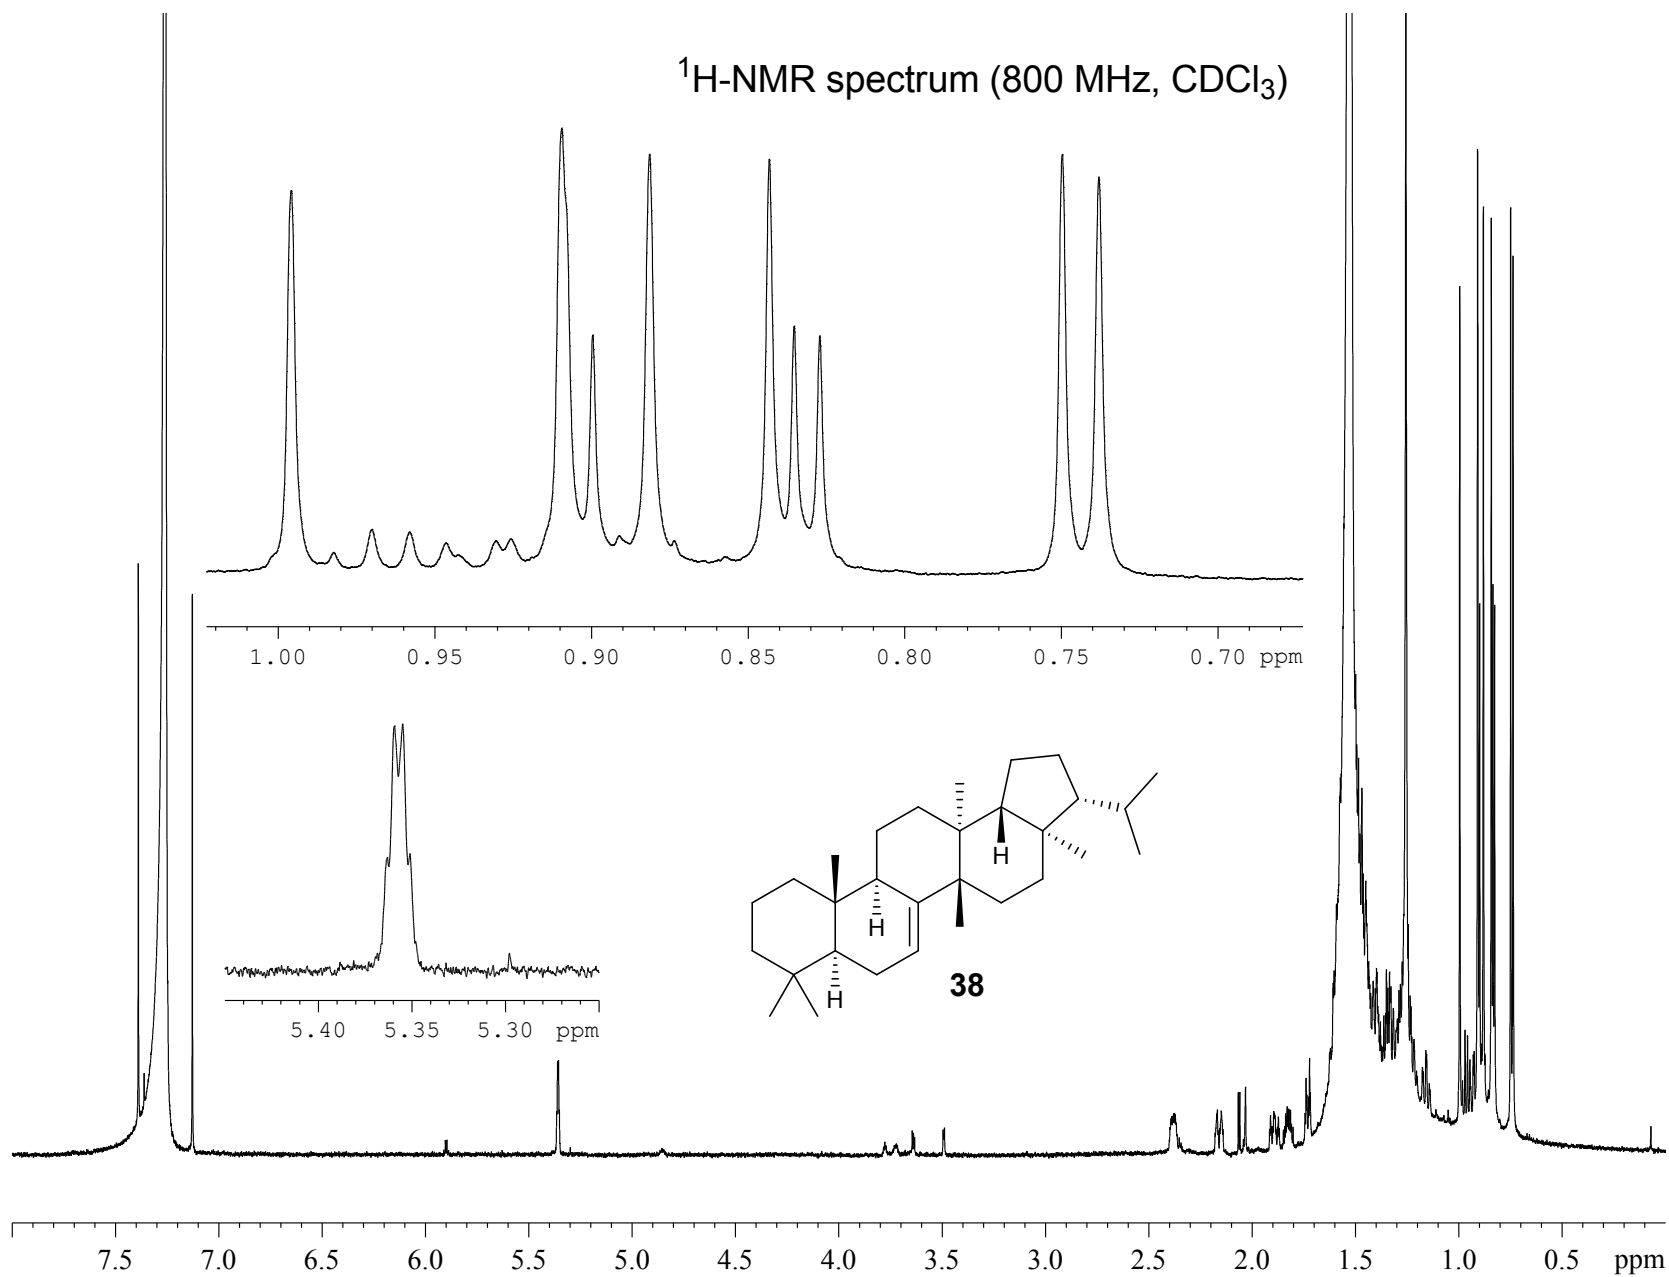

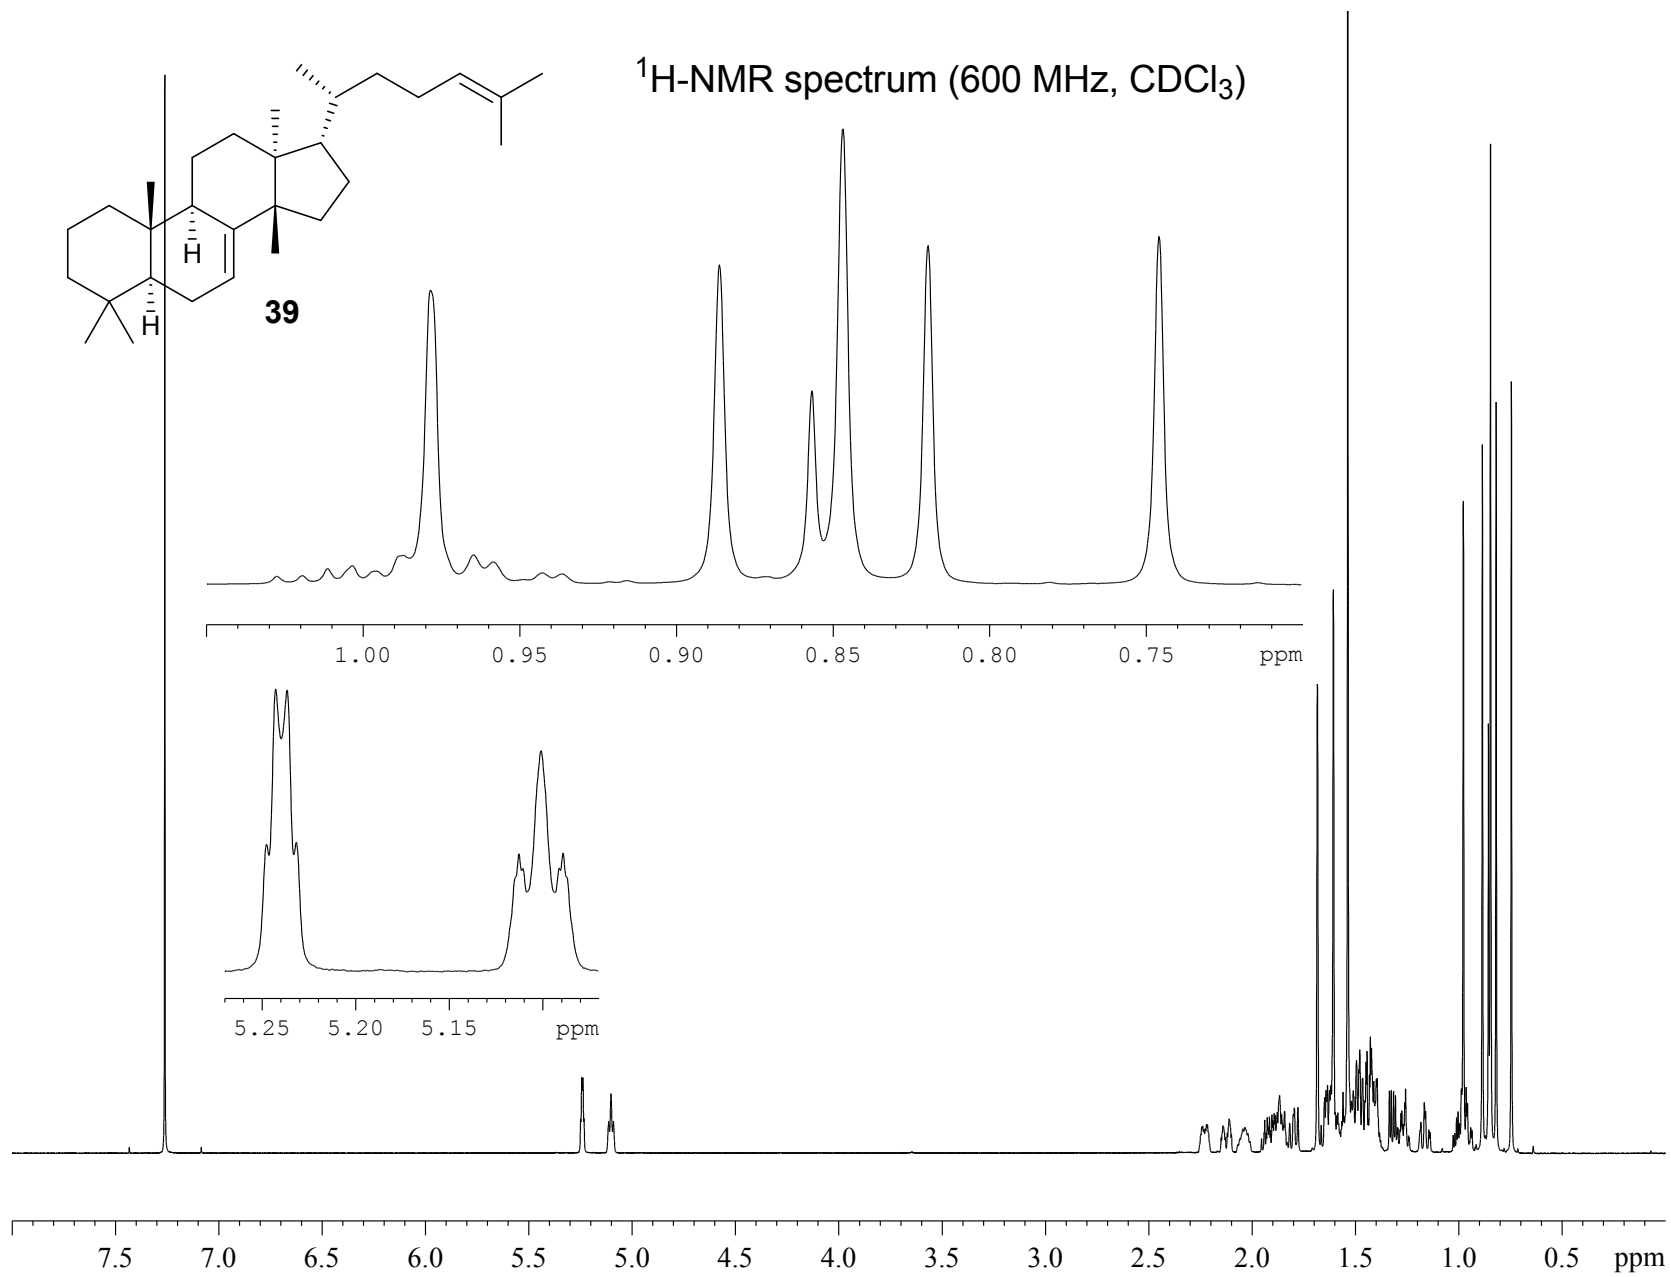

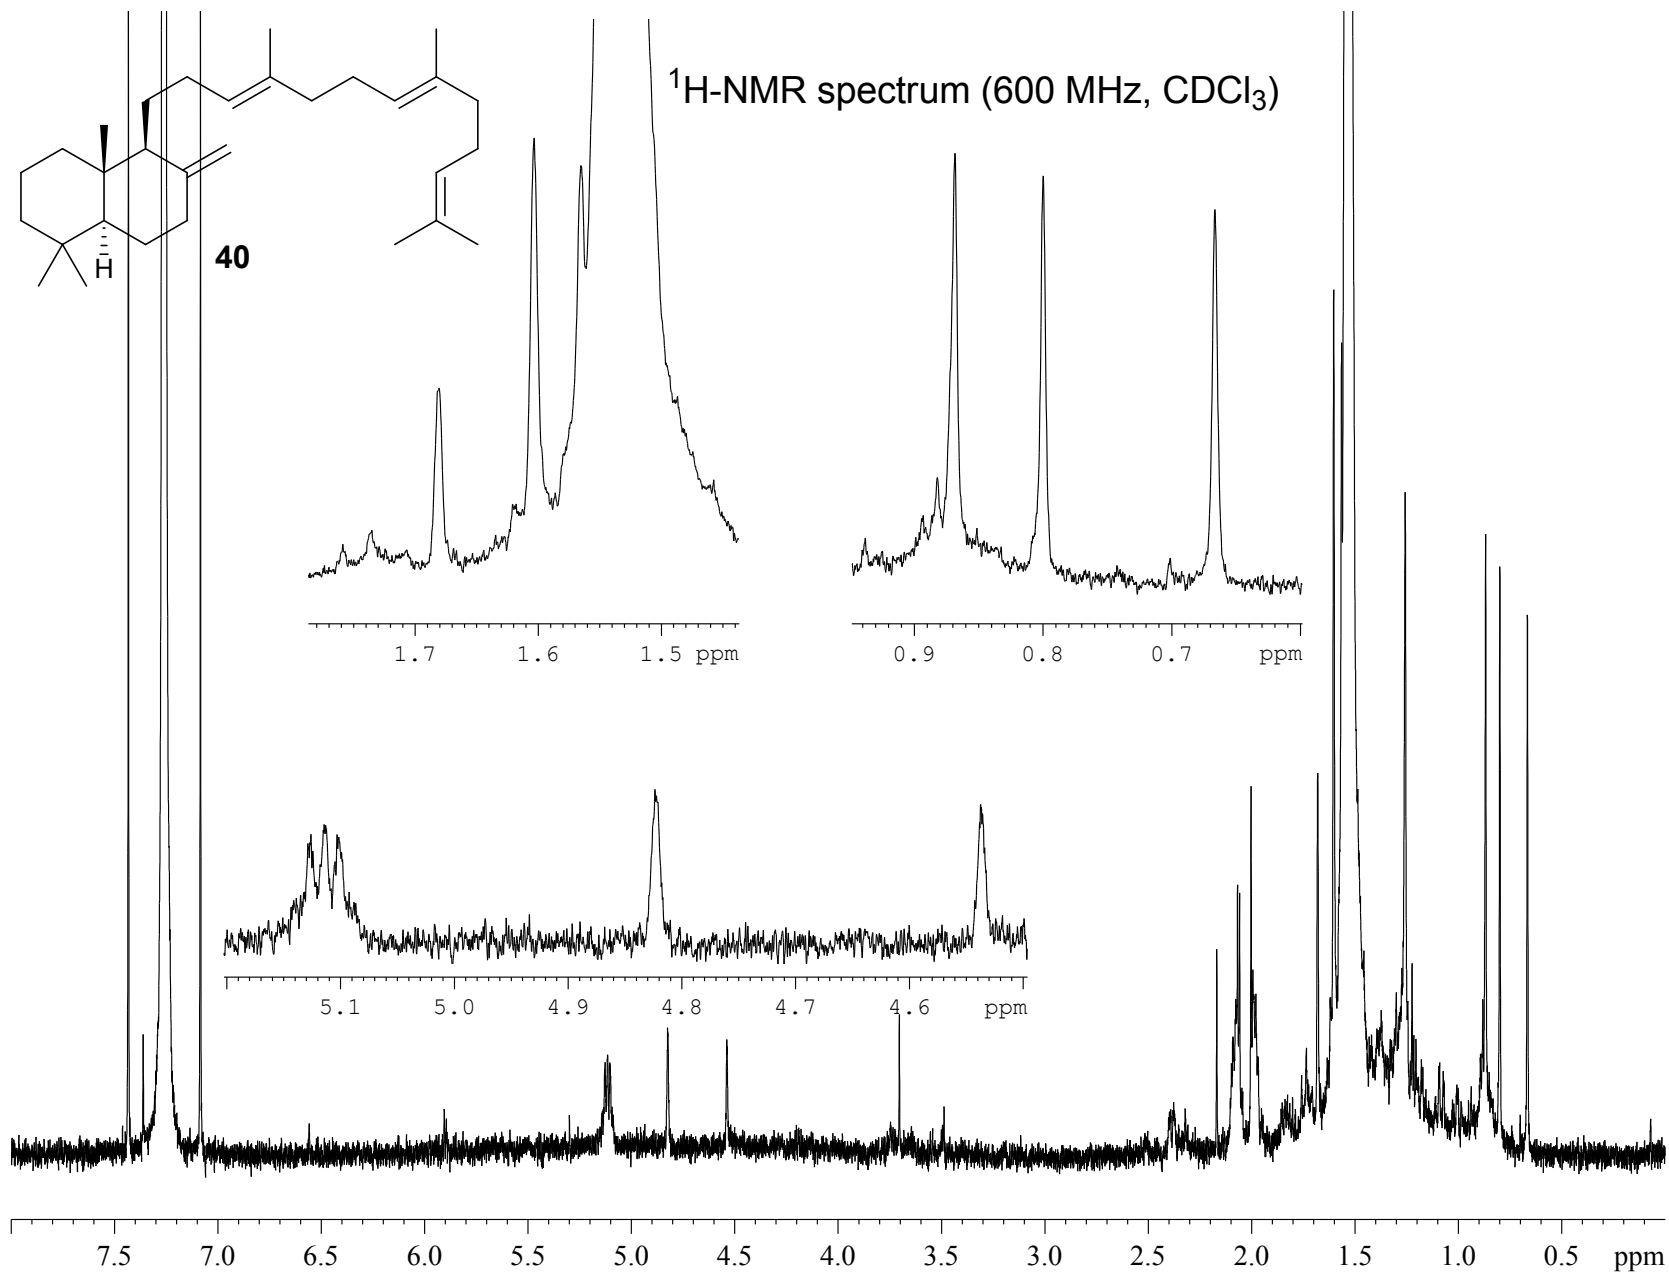

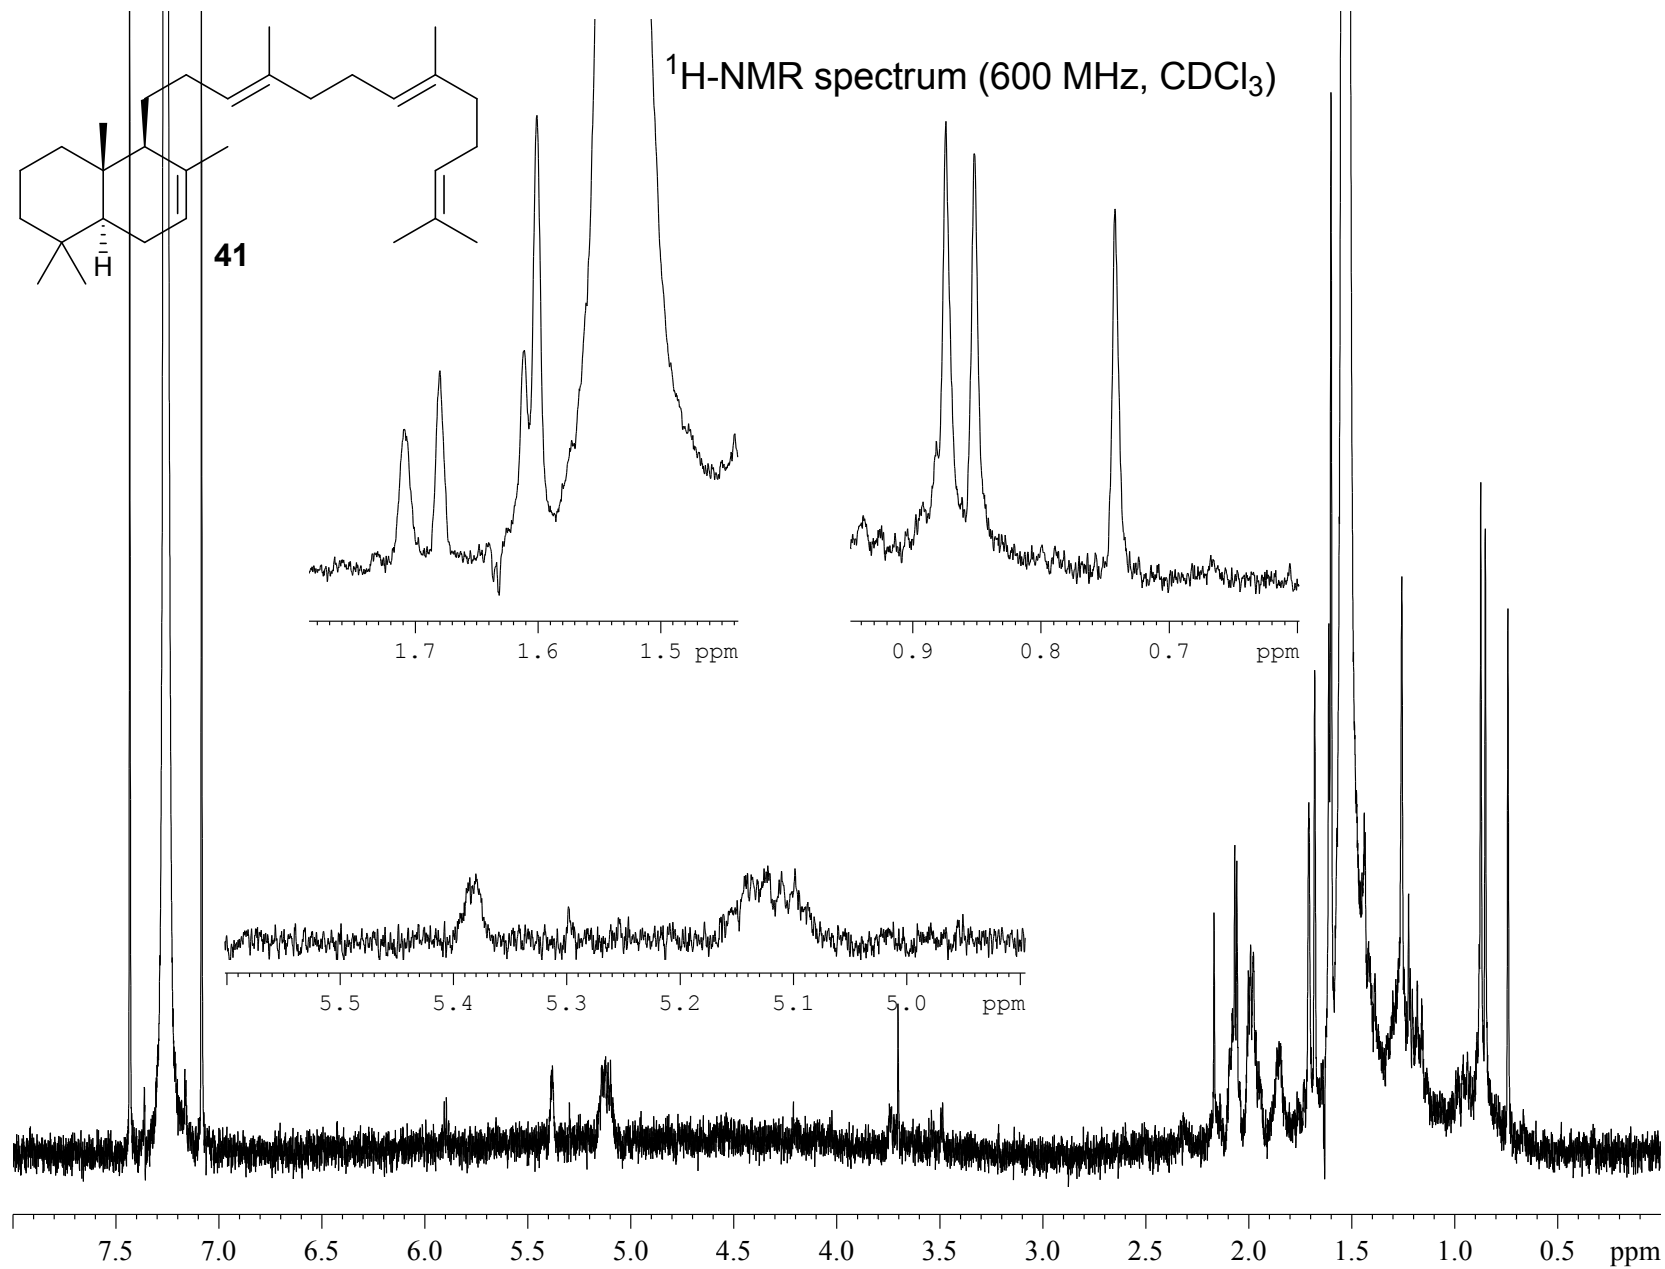

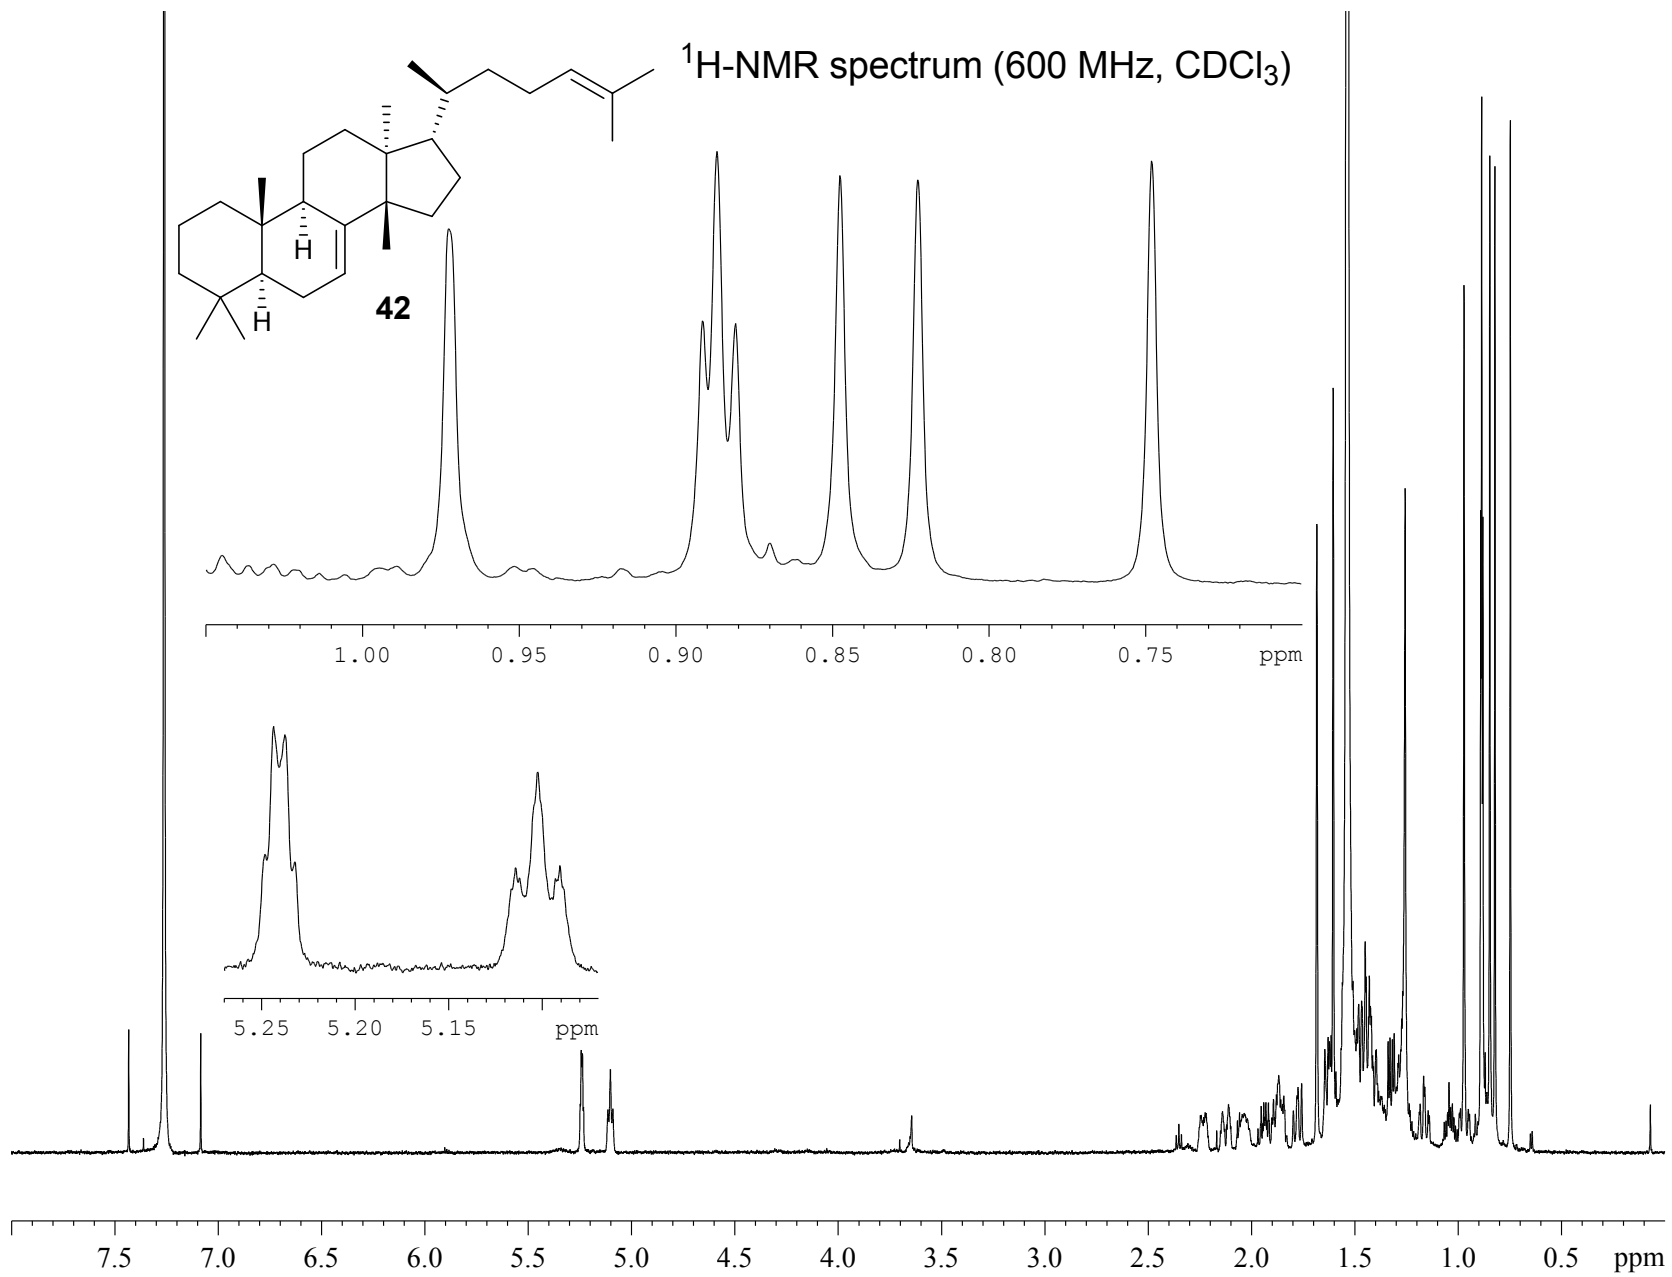

Supplement: c7ob00296c1.pdf [file c7ob00296c1.pdf]
